# Supplementary material
Source: Royal Society of Chemistry journal article supplement (doi:10.1039/d5su00883b)
Supplement: d5su00883b1.xlsx [file d5su00883b1.xlsx]

## Sheet: appendix 1
Dimension	Indicator	AI indicators' category	Final indicators' category	Tool
Environmental Sustainability Indicators	Will your novel material or product impact any of the selected SDG targets?	Contribution to SDGs	Contribution to SDGs	WASP
Economic sustainability Indicators	Will your novel material or product impact any of the selected SDG targets?	Contribution to SDGs	Contribution to SDGs	WASP
Social sustainability Indicators	Will your novel material or product impact any of the selected SDG targets?	Contribution to SDGs	Contribution to SDGs	WASP
Environmental Sustainability Indicators	energy consumption	Energy Consumption	Energy Consumption	NGRA framework
Environmental Sustainability Indicators	material consumption	material consumption	Resource Efficiency	NGRA framework
Environmental Sustainability Indicators	green-house gasses emissions	Emissions	Climate Change	NGRA framework
Environmental Sustainability Indicators	emission of hazardous substances in air, soil or water from manufacturing, use or recycling	Emissions	Emissions	NGRA framework
Environmental Sustainability Indicators	product lifetime	End of life information	Functionality	NGRA framework
Environmental Sustainability Indicators	environmental risk		Environment resilience and vulnerability	NGRA framework
Economic sustainability Indicators	innovation	Innovation and R&D	Innovation and R&D	NGRA framework
Economic sustainability Indicators	marketability		Market dimension and Application Potential	NGRA framework
Economic sustainability Indicators	increased of efficiency compared to bulk or other conventional alternative		Functionality	NGRA framework
Economic sustainability Indicators	profitability		Revenues	NGRA framework
Economic sustainability Indicators	time to market launch		Market dimension and Application Potential	NGRA framework
Economic sustainability Indicators	availability and suitability of alternative substances	Economic Benefits	Economic Benefits	NGRA framework
Economic sustainability Indicators	impact on trade, competitiveness and investment	Economic Impacts	Market dimension and Application Potential	NGRA framework
Social sustainability Indicators	capacity to improve quality of life		Social improvement	NGRA framework
Social sustainability Indicators	impact on next generation		Social improvement	NGRA framework
Social sustainability Indicators	occupational health risk		Occupational safety	NGRA framework
Social sustainability Indicators	consumer health risk		Consumer Health and Safety	NGRA framework
Social sustainability Indicators	public health and safety		Healthcare Access	NGRA framework
Social sustainability Indicators	employment opportunities	Employment	Employment	NGRA framework
Environmental Sustainability Indicators	Improvements in medical diagnostics and treatment	Other Environmental Impacts	Social improvement	AdMa_overview
Environmental Sustainability Indicators	Persistence and (biological) degradation	Material Stability	Persistent, bioaccumulative and toxic	AdMa_overview
Environmental Sustainability Indicators	Bioaccumulation	Eco-Toxicity	Persistent, bioaccumulative and toxic	AdMa_overview
Environmental Sustainability Indicators	Possibility to separate products (and/or their components) that contain advanced materials from the waste streams	Circular Economy	Circular Economy	AdMa_overview
Environmental Sustainability Indicators	Recyclability: ability to recover the advanced material with an intact (meta) structure	Circular Economy	Circular Economy	AdMa_overview
Environmental Sustainability Indicators	Disturbance of the recycling process and / or decrease in the quality of recyclates	Circular Economy	Circular Economy	AdMa_overview
Environmental Sustainability Indicators	Circularity of material flows in general	Circular Economy	Circular Economy	AdMa_overview
Environmental Sustainability Indicators	Potential to recover and recycle the advanced material from products at the end of their service life	Circular Economy	Circular Economy	AdMa_overview
Environmental Sustainability Indicators	Consumption of critical raw materials	Resource Efficiency	Critical materials	AdMa_overview
Environmental Sustainability Indicators	Contamination of material cycles; Eco toxicity and/or content of (eco-)toxic building blocks	Eco-Toxicity	Eco-Toxicity	AdMa_overview
Environmental Sustainability Indicators	Data for material and/or building blocks indicates SVHC propertiesand/or other hazards to human health or the environment	Eco-Toxicity	Eco-Toxicity	AdMa_overview
Environmental Sustainability Indicators	Emission potential	Emissions	Emissions	AdMa_overview
Environmental Sustainability Indicators	Energy use	Operating Costs	Energy Consumption	AdMa_overview
Environmental Sustainability Indicators	Substitution of hazardous substances or materials	Resource Efficiency	Hazardous substances or materials	AdMa_overview
Regulatory Indicators	Availability of information on uses and release	Information Availability	Data management and Transparency	AdMa_overview
Economic sustainability Indicators	Number of patents involving use of advanced materials	Innovation and R&D	Innovation and R&D	AdMa_overview
Economic sustainability Indicators	Number of funding programmes and/or specific research calls	Innovation and R&D	Innovation and R&D	AdMa_overview
Economic sustainability Indicators	Potential of the material to enter one or several applications or markets: products, processes and sectors of use	-	Market dimension and Application Potential	AdMa_overview
Economic sustainability Indicators	Known applications in products and processes	Market and Application Potential	Market dimension and Application Potential	AdMa_overview
Economic sustainability Indicators	Production and/or use amounts	Supply Chain and Production	Market dimension and Application Potential	AdMa_overview
Environmental Sustainability Indicators	Stability of the materials during use	Material Stability	Environmental exposure, fate, stability and transformation	AdMa_overview
Environmental Sustainability Indicators	Durability / longevity of products (positive = longer lifetime)	Product Quality	Functionality	AdMa_overview
Regulatory Indicators	Substance definition applies	Regulatory Scope	Chemical/material within the scope of availalbe legislations	AdMa_overview
Regulatory Indicators	The definition of a nanoform according to REACH Annex VI applies	Regulatory Scope	Chemical/material within the scope of availalbe legislations	AdMa_overview
Regulatory Indicators	Polymer definition applies	Regulatory Scope	Chemical/material within the scope of availalbe legislations	AdMa_overview
Regulatory Indicators	Mixture definition applies	Regulatory Scope	Chemical/material within the scope of availalbe legislations	AdMa_overview
Regulatory Indicators	Article definition applies	Regulatory Scope	Chemical/material within the scope of availalbe legislations	AdMa_overview
Regulatory Indicators	Availability of appropriate test methods and guidance;	Regulatory Scope	Recognised techniques for characterisation and exposure estimation	AdMa_overview
Regulatory Indicators	Availability of suitable modelling tools (QSARs etc.)	Regulatory Scope	Recognised techniques for characterisation and exposure estimation	AdMa_overview
Regulatory Indicators	Availability of approaches, tests and modelling tools to determine exposure levels for the material as such	-	Recognised techniques for characterisation and exposure estimation	AdMa_overview
Environmental Sustainability Indicators	Raw material use	Resource Efficiency	Resource Efficiency	AdMa_overview
Environmental Sustainability Indicators	Replacing the use of critical resources	Resource Efficiency	Resource Efficiency	AdMa_overview
Environmental Sustainability Indicators	Critical degradation products	Eco-Toxicity	Waste production and management	AdMa_overview
Environmental Sustainability Indicators	Can the raw materials be recycled? Is there a possibility to integrate these into a circular economy model?	Circular Economy	Circular Economy	AdMaCat
Environmental Sustainability Indicators	Are critical/non-renewable raw materials used?	Resource Efficiency	Critical materials	AdMaCat
Environmental Sustainability Indicators	Does the manufacturing process lead to emissions of other greenhouse gases than CO2?	Emissions	Emissions	AdMaCat
Environmental Sustainability Indicators	Does the manufacturing process lead to emissions of persistent organic pollutants (Stockholm Convention listed chemicals)?	Emissions	Emissions	AdMaCat
Environmental Sustainability Indicators	Does the manufacturing process lead to emissions of heavy metals?	Emissions	Emissions	AdMaCat
Environmental Sustainability Indicators	Does the manufacturing process require high energy consumption?	Energy Consumption	Energy Consumption	AdMaCat
Environmental Sustainability Indicators	Is the use of lightweight materials encouraged to reduce energy consumption during transportation?	Energy Consumption	Energy Consumption	AdMaCat
Environmental Sustainability Indicators	Does the manufacturing process require extensive land use?	Other Environmental Impacts	Land Consumption	AdMaCat
Environmental Sustainability Indicators	Does the manufacturing process lead to emissions of ozone depleting gases?	Emissions	Ozone depletion	AdMaCat
Environmental Sustainability Indicators	Has the future supply chain been addressed to consider the economic viability and industry concerns of producing and recovering the material on an industrial scale?	Resource Efficiency	Resource Efficiency	AdMaCat
Environmental Sustainability Indicators	Are alternative technologies promoted to reduce material waste?	Waste Management	Waste production and management	AdMaCat
Environmental Sustainability Indicators	Can the waste generated during production be recycled or reused?	Waste Management	Waste production and management	AdMaCat
Environmental Sustainability Indicators	Does the manufacturing process require high volumes of water or solvents?	Water Consumption	Water Consumption	AdMaCat
Social sustainability Indicators	mediation between conflicting parties	Conflict Management	Conflicts Management	Agent_network
Social sustainability Indicators	consumer requirements and acceptance	Consumer Satisfaction	Consumer Benefits	Agent_network
Economic sustainability Indicators	business-related R&D	Innovation and R&D	Innovation and R&D	Agent_network
Economic sustainability Indicators	market demand	Market and Application Potential	Market dimension and Application Potential	Agent_network
Economic sustainability Indicators	competition	Other Business Indicators	Market dimension and Application Potential	Agent_network
Economic sustainability Indicators	business opportunities	Other Business Indicators	Market dimension and Application Potential	Agent_network
Economic sustainability Indicators	process optimization	Supply Chain and Production	Process Optimization	Agent_network
Environmental Sustainability Indicators	Is there an indication of accumulation/persistence in one or more of the environmental compartments (of the AdMas or released substances/materials)?	Material Stability	Persistent, bioaccumulative and toxic	Early4AdMa
Environmental Sustainability Indicators	Is there an indication of bioaccumulation of the AdMa or released incorporated substances by animals or plants?	Eco-Toxicity	Persistent, bioaccumulative and toxic	Early4AdMa
Environmental Sustainability Indicators	Is a technically feasible and established process for recycling the raw material missing?	Circular Economy	Circular Economy	Early4AdMa
Environmental Sustainability Indicators	Are technically feasible and established possibilities for re-use and recycling of generated waste missing?	Circular Economy	Circular Economy	Early4AdMa
Environmental Sustainability Indicators	Is re-use of the materials in the same or another function technically infeasible/impractical?	Circular Economy	Circular Economy	Early4AdMa
Environmental Sustainability Indicators	Are different components used that are integrated, which might make recycling technically difficult?	-	Circular Economy	Early4AdMa
Environmental Sustainability Indicators	Is a concept or plan to recover and recycle the individual materials missing?	Circular Economy	Circular Economy	Early4AdMa
Environmental Sustainability Indicators	Is a technically feasible and established process to recycle the AdMa/products containing AdMa missing?	Circular Economy	Circular Economy	Early4AdMa
Environmental Sustainability Indicators	Is there an indication of potential of mobility across one or more environmental compartments (of the AdMas or released substances/materials)?	Material Stability	Environmental exposure, fate, stability and transformation	Early4AdMa
Environmental Sustainability Indicators	Is there an indication of uptake of the AdMa or released incorporated substances by animals or plants?	Eco-Toxicity	Environmental exposure, fate, stability and transformation	Early4AdMa
Environmental Sustainability Indicators	Is direct exposure of biota in one or more environmental compartments likely?	Eco-Toxicity	Environmental exposure, fate, stability and transformation	Early4AdMa
Environmental Sustainability Indicators	Is release of the AdMa itself or of incorporated substances/particles to one or more environmental compartments likely?	Eco-Toxicity	Environmental exposure, fate, stability and transformation	Early4AdMa
Environmental Sustainability Indicators	Is environmental exposure to the AdMa likely to occur, based on production, use, end-of-life or recycling considerations?	-	Environmental exposure, fate, stability and transformation	Early4AdMa
Environmental Sustainability Indicators	Is one of the environmental compartments likely to act as a sink for the material?	Eco-Toxicity	Environmental exposure, fate, stability and transformation	Early4AdMa
Environmental Sustainability Indicators	Are critical raw materials used?	Resource Efficiency	Critical materials	Early4AdMa
Environmental Sustainability Indicators	Are the raw materials used problematic substances?	Eco-Toxicity	Hazardous substances or materials	Early4AdMa
Environmental Sustainability Indicators	Do the processes of manufacturing and production include the use of problematic substances?	Eco-Toxicity	Hazardous substances or materials	Early4AdMa
Environmental Sustainability Indicators	Is there an indication of endocrine disruption?	Eco-Toxicity	Hazardous substances or materials	Early4AdMa
Environmental Sustainability Indicators	Is there an indication of another hazard or increased toxicity as compared to the conventional material(s)?	Eco-Toxicity	Hazardous substances or materials	Early4AdMa
Environmental Sustainability Indicators	Is the application of the AdMa short-lived, only?	-	Functionality	Early4AdMa
Environmental Sustainability Indicators	Is it likely that the AdMa will be produced in higher volumes, and/or in many applications?	-	Market dimension and Application Potential	Early4AdMa
Environmental Sustainability Indicators	Is there an indication that fate of multicomponent material differs from that of the individual components of the material?	Material Stability	Environmental exposure, fate, stability and transformation	Early4AdMa
Regulatory Indicators	If the material(s) or its application(s) falls within the scope of relevant (possibly sector-specific) legislation do the information requirements for substance identification lack provisions that explicitly address the nano/‌multicomponent/‌advanced character of the material?	-	Chemical/material within the scope of availalbe legislations	Early4AdMa
Regulatory Indicators	If the answer to the previous question is “yes”:	Regulatory Gaps	Chemical/material within the scope of availalbe legislations	Early4AdMa
Regulatory Indicators	If the material(s) or its application(s) falls within the scope of relevant (possibly sector-specific) legislation do the information requirements for substance identification lack provisions that allow addressing the nano/‌multicomponent/‌advanced character of the material?	-	Chemical/material within the scope of availalbe legislations	Early4AdMa
Regulatory Indicators	If the material(s) or its application(s) falls within the scope of relevant (possibly sector-specific) legislation, do the information requirements lack provisions that cover the potential human health safety issues (section 3.2) for the AdMa?	-	Chemical/material within the scope of availalbe legislations	Early4AdMa
Regulatory Indicators	If the material(s) or its application(s) falls within the scope of relevant (possibly sector-specific) legislation, do the information requirements lack provisions that cover the potential environmental safety issues (section 3.3) for the AdMa?	-	Chemical/material within the scope of availalbe legislations	Early4AdMa
Regulatory Indicators	Are any of the current existing test methods and assessment strategies (e.g. guidance) targeting potential human health safety issues considered unsuitable or are test methods missing applicable for the AdMa?	Testing and Guidance	Chemical/material within the scope of availalbe legislations	Early4AdMa
Regulatory Indicators	Are any of the current existing test methods and assessment strategies (e.g. guidance) targeting potential environmental safety issues considered unsuitable or a test methods missing applicable for the AdMa?	Testing and Guidance	Chemical/material within the scope of availalbe legislations	Early4AdMa
Regulatory Indicators	Is the material or its application outside of the scope of (possibly sector-specific) legislation or guidance that address sustainability aspects besides safety (e.g. waste, energy demand)?	Waste Management	Chemical/material within the scope of availalbe legislations	Early4AdMa
Regulatory Indicators	If the answer to the previous question is “no”:	Sustainability Gaps	Chemical/material within the scope of availalbe legislations	Early4AdMa
Regulatory Indicators	Does the legislation or guidance lacks provisions that address the AdMa of the material?	Regulatory Gaps	Chemical/material within the scope of availalbe legislations	Early4AdMa
Environmental Sustainability Indicators	Is a higher energy/material effort expected to achieve similar service performance than for a reference material/substance in a comparable application?	Product Quality	Resource Efficiency	Early4AdMa
Environmental Sustainability Indicators	Is waste generated during manufacturing, production, transport or use?	Waste Management	Waste production and management	Early4AdMa
Environmental Sustainability Indicators	Does the waste generated during manufacturing, production, transport and use contain problematic substances?	Waste Management	Waste production and management	Early4AdMa
Environmental Sustainability Indicators	Does the process of extracting the raw materials require high energy, water, or land consumption and/or have an impact on global warming potential (emission of greenhouse gases)?	Climate Change	Water Consumption	Early4AdMa
Environmental Sustainability Indicators	Does the process of extracting the raw materials require high energy, water, or land consumption and/or have an impact on global warming potential (emission of greenhouse gases)?	Climate Change	Energy Consumption	Early4AdMa
Environmental Sustainability Indicators	Does the process of extracting the raw materials require high energy, water, or land consumption and/or have an impact on global warming potential (emission of greenhouse gases)?	Climate Change	Land Consumption	Early4AdMa
Environmental Sustainability Indicators	Does the process of extracting the raw materials require high energy, water, or land consumption and/or have an impact on global warming potential (emission of greenhouse gases)?	Climate Change	Climate change	Early4AdMa
Environmental Sustainability Indicators	Does the process of manufacturing, production, transport, use or consumption require high energy, water or land consumption or have an impact on global warming potential (emission of greenhouse gases)?	Climate Change	Water Consumption	Early4AdMa
Environmental Sustainability Indicators	Does the process of manufacturing, production, transport, use or consumption require high energy, water or land consumption or have an impact on global warming potential (emission of greenhouse gases)?	Climate Change	Energy Consumption	Early4AdMa
Environmental Sustainability Indicators	Does the process of manufacturing, production, transport, use or consumption require high energy, water or land consumption or have an impact on global warming potential (emission of greenhouse gases)?	Climate Change	Land Consumption	Early4AdMa
Environmental Sustainability Indicators	Does the process of manufacturing, production, transport, use or consumption require high energy, water or land consumption or have an impact on global warming potential (emission of greenhouse gases)?	Climate Change	Climate change	Early4AdMa
Environmental Sustainability Indicators	Does the process of recycling require high amounts of energy, water, or land consumption and/or have an impact on global warming potential (emission of greenhouse gases)?	Climate Change	Water Consumption	Early4AdMa
Environmental Sustainability Indicators	Does the process of recycling require high amounts of energy, water, or land consumption and/or have an impact on global warming potential (emission of greenhouse gases)?	Climate Change	Energy Consumption	Early4AdMa
Environmental Sustainability Indicators	Does the process of recycling require high amounts of energy, water, or land consumption and/or have an impact on global warming potential (emission of greenhouse gases)?	Climate Change	Land Consumption	Early4AdMa
Environmental Sustainability Indicators	Does the process of recycling require high amounts of energy, water, or land consumption and/or have an impact on global warming potential (emission of greenhouse gases)?	Climate Change	Climate change	Early4AdMa
Economic sustainability Indicators	Types of consumer costs	Consumer Costs	Use costs	ECHA_SEA
Economic sustainability Indicators	Change in market price	Consumer Costs	Use costs	ECHA_SEA
Economic sustainability Indicators	Change in annual maintenance /repair costs (i.e. if the product is not as durable)	Consumer Costs	Use costs	ECHA_SEA
Economic sustainability Indicators	Change in effectiveness of the end product	Consumer Costs	Use costs	ECHA_SEA
Economic sustainability Indicators	Change in the availability and choice	Consumer Costs	Use costs	ECHA_SEA
Economic sustainability Indicators	Types of downstream user costs	Downstream User Costs	Use costs	ECHA_SEA
Economic sustainability Indicators	Change in the lifetime of the suppliers product (i.e. from a manufacturer/importer)	Downstream User Costs	Manufacturing costs	ECHA_SEA
Economic sustainability Indicators	Change in the market price of the suppliers product	Downstream User Costs	Manufacturing costs	ECHA_SEA
Economic sustainability Indicators	Change in effectiveness of the suppliers product	Downstream User Costs	Manufacturing costs	ECHA_SEA
Economic sustainability Indicators	Change in the availability and cost of using an alternative	Downstream User Costs	Manufacturing costs	ECHA_SEA
Environmental Sustainability Indicators	Air quality impairment	Air Quality	Air Quality	ECHA_SEA
Environmental Sustainability Indicators	Ecological impairment, i.e. biodiversity and functioning	Biodiversity	Biodiversity	ECHA_SEA
Environmental Sustainability Indicators	Habitat destruction	Biodiversity	Biodiversity	ECHA_SEA
Social sustainability Indicators	Change in labour required by upstream suppliers (including upstream suppliers for an alternative)	Labour Impact	Labour Impact	ECHA_SEA
Social sustainability Indicators	Change in labour required for manufacturers of the substance / alternative	Labour Impact	Labour Impact	ECHA_SEA
Social sustainability Indicators	Change in labour required for transporting the substance / alternative	Labour Impact	Labour Impact	ECHA_SEA
Social sustainability Indicators	Change in labour required for distributing the substance / alternative	Labour Impact	Labour Impact	ECHA_SEA
Social sustainability Indicators	Change in labour required for storing the substance / alternative	Labour Impact	Labour Impact	ECHA_SEA
Social sustainability Indicators	Change in labour required by downstream users	Labour Impact	Labour Impact	ECHA_SEA
Social sustainability Indicators	Location	Costs of Alternatives	Workplace Conditions	ECHA_SEA
Social sustainability Indicators	Change in the number of children employed	Child Labour	Child Labour	ECHA_SEA
Environmental Sustainability Indicators	Climate change (e.g. greenhouse gas emissions)	Emissions	Climate Change	ECHA_SEA
Economic sustainability Indicators	Cost difference of using a potential alternative (substance or technology) compared to the substance proposed to be restricted (cost differences for all affected industries)	-	Use costs	ECHA_SEA
Economic sustainability Indicators	Cost difference in case of relocation of production (costs of establishing production facilities, cost of raw materials, transport costs etc)	Geographical Impact	Capital costs	ECHA_SEA
Economic sustainability Indicators	Cost differences in case of change in quality of end-product (e.g. end product less energy efficient)	-	Use costs	ECHA_SEA
Economic sustainability Indicators	Loss in asset value based on best alternative use (if any) of production facilities that become redundant under the proposed restriction	-	Other costs	ECHA_SEA
Economic sustainability Indicators	Changes in the cost of compliance and monitoring	-	Other costs	ECHA_SEA
Economic sustainability Indicators	Changes in regulatory costs	Regulatory and Compliance Costs	Other costs	ECHA_SEA
Economic sustainability Indicators	Change in the lifetime of the end product	Consumer Costs	Use costs	ECHA_SEA
Economic sustainability Indicators	Change the market price	Consumer Costs	Use costs	ECHA_SEA
Economic sustainability Indicators	Change in costs to the end product consumer	Consumer Costs	Use costs	ECHA_SEA
Economic sustainability Indicators	Types of investment costs	Investment Costs	Capital costs	ECHA_SEA
Economic sustainability Indicators	Change in performance testing costs	Product Quality	Other costs	ECHA_SEA
Economic sustainability Indicators	Change in property rights costs	Regulatory and Compliance Costs	Other costs	ECHA_SEA
Economic sustainability Indicators	Change in equipment costs	Investment Costs	Capital costs	ECHA_SEA
Economic sustainability Indicators	Change in modification costs	Investment Costs	Other costs	ECHA_SEA
Economic sustainability Indicators	Change in general site and operations costs	Operating Costs	Manufacturing costs	ECHA_SEA
Economic sustainability Indicators	Change in decommissioning costs	Investment Costs	Other costs	ECHA_SEA
Economic sustainability Indicators	Types of operating costs	Operating Costs	Manufacturing costs	ECHA_SEA
Economic sustainability Indicators	Energy costs	Operating Costs	Manufacturing costs	ECHA_SEA
Economic sustainability Indicators	Change in electricity costs	Operating Costs	Manufacturing costs	ECHA_SEA
Economic sustainability Indicators	Change in natural gas costs	Operating Costs	Manufacturing costs	ECHA_SEA
Economic sustainability Indicators	Change in petroleum products costs	Operating Costs	Manufacturing costs	ECHA_SEA
Economic sustainability Indicators	Change in coal or other solid fuels costs	Operating Costs	Manufacturing costs	ECHA_SEA
Economic sustainability Indicators	Materials and services costs:	Operating Costs	Materials costs	ECHA_SEA
Economic sustainability Indicators	Change in transportation costs	Operating Costs	Transportation costs	ECHA_SEA
Economic sustainability Indicators	Change in storage costs	Operating Costs	Other costs	ECHA_SEA
Economic sustainability Indicators	Change in distribution costs	Operating Costs	Use costs	ECHA_SEA
Economic sustainability Indicators	Change in packaging and labelling costs	Operating Costs	Other costs	ECHA_SEA
Economic sustainability Indicators	Change in replacement part costs	Operating Costs	Maintenance costs	ECHA_SEA
Economic sustainability Indicators	Change in auxiliary costs, such as chemicals, water	-	Manufacturing costs	ECHA_SEA
Economic sustainability Indicators	Change in environmental service costs, such as waste treatment and disposal services	Waste Management	Waste management costs	ECHA_SEA
Economic sustainability Indicators	Labour costs:	Labour and Training Costs	Personell costs	ECHA_SEA
Economic sustainability Indicators	Change in operating costs, supervisory costs and maintenance staff costs	-	Personell costs	ECHA_SEA
Economic sustainability Indicators	Change in training costs of the above staff	Labour and Training Costs	Personell costs	ECHA_SEA
Economic sustainability Indicators	Types of maintenance costs	Maintenance and Repair Costs	Maintenance costs	ECHA_SEA
Economic sustainability Indicators	Change in sampling, testing and monitoring costs	-	Maintenance costs	ECHA_SEA
Economic sustainability Indicators	Change in insurance premium costs	Regulatory and Compliance Costs	Other costs	ECHA_SEA
Economic sustainability Indicators	Change in marketing costs, license fees and other regulatory compliance activities	-	Other costs	ECHA_SEA
Economic sustainability Indicators	Change in emergency provision costs	Regulatory and Compliance Costs	Other costs	ECHA_SEA
Economic sustainability Indicators	Change in other general overhead costs (e.g. administration)	Operating Costs	Other costs	ECHA_SEA
Economic sustainability Indicators	Revenue sources:	Revenue and Profitability	Revenues	ECHA_SEA
Economic sustainability Indicators	Change in sales	Revenue and Profitability	Revenues	ECHA_SEA
Economic sustainability Indicators	Change in production efficiency / downtime	Revenue and Profitability	Revenues	ECHA_SEA
Economic sustainability Indicators	Change in interest on working capital	Revenue and Profitability	Revenues	ECHA_SEA
Economic sustainability Indicators	Change in residual value of equipment	Revenue and Profitability	Revenues	ECHA_SEA
Economic sustainability Indicators	Change in administrative costs associated with, for example, licensing an activity	-	Other costs	ECHA_SEA
Economic sustainability Indicators	Change in inspection and monitoring costs (e.g. of imports, of emissions, etc.)	Emissions	Other costs	ECHA_SEA
Economic sustainability Indicators	Change in costs of any scientific modelling, sampling and testing	-	Other costs	ECHA_SEA
Economic sustainability Indicators	Change in enforcement costs	Regulatory and Compliance Costs	Other costs	ECHA_SEA
Environmental Sustainability Indicators	These impacts cover all possible effects directly related to the toxic, eco-toxic or physicochemical properties of the substance proposed for restriction or any alternative substance, as well as any other health and environmental impacts occurring in all affected supply chains in relation to the introduction of alternative substances or technologies.	-	Eco-Toxicity	ECHA_SEA
Social sustainability Indicators	Number of jobs	Employment	Employment	ECHA_SEA
Social sustainability Indicators	Occupational groups	Employment Categories	Employment	ECHA_SEA
Social sustainability Indicators	Change in employment for each Member State	Employment	Employment	ECHA_SEA
Social sustainability Indicators	Change in employment overall inside of the EU	Employment	Employment	ECHA_SEA
Social sustainability Indicators	Change in employment overall outside of the EU	Employment	Employment	ECHA_SEA
Social sustainability Indicators	Change in training available	Employee Development	Employment	ECHA_SEA
Social sustainability Indicators	Change in employment conditions	Employment	Employment	ECHA_SEA
Social sustainability Indicators	Workers	Labour Demand	Employment	ECHA_SEA
Environmental Sustainability Indicators	Resilience and vulnerability to environmental impacts	Other Environmental Impacts	Environment resilience and vulnerability	ECHA_SEA
Social sustainability Indicators	Change in the number of forced labour	Forced Labour	Forced Labour	ECHA_SEA
Social sustainability Indicators	Consumer welfare	Consumer Wellbeing	Consumer Benefits	ECHA_SEA
Social sustainability Indicators	Change in utility (satisfaction) - from loss in functionality of the product	-	Functionality	ECHA_SEA
Social sustainability Indicators	Change in utility (satisfaction) - from loss in durability of the product	Product Quality	Functionality	ECHA_SEA
Social sustainability Indicators	Change in utility (satisfaction) - from product no longer being available	-	Functionality	ECHA_SEA
Social sustainability Indicators	Change in utility (satisfaction) - for any other reason	-	Functionality	ECHA_SEA
Economic sustainability Indicators	Whether this is the only substance they produce/shell	Supply Chain and Production	Functionality	ECHA_SEA
Economic sustainability Indicators	Change in the lifetime of the end product	Consumer Costs	Functionality	ECHA_SEA
Economic sustainability Indicators	Change in innovation and research & development costs	Innovation and R&D	Innovation and R&D	ECHA_SEA
Social sustainability Indicators	Change in job security	Job Security	Workplace Conditions	ECHA_SEA
Social sustainability Indicators	Change in demand for unskilled workers	Labour Demand	Employment	ECHA_SEA
Social sustainability Indicators	Change in demand for manual workers	Labour Demand	Employment	ECHA_SEA
Social sustainability Indicators	Change in demand for skilled and specialist workers (particular relevant for niche industries)	Labour Demand	Employment	ECHA_SEA
Environmental Sustainability Indicators	Landscape/aesthetic quality of environment	Other Environmental Impacts	Land Consumption	ECHA_SEA
Social sustainability Indicators	Change in support given to families	Employee Welfare	Social improvement	ECHA_SEA
Economic sustainability Indicators	Change in annual maintenance/repair costs	Maintenance and Repair Costs	Maintenance costs	ECHA_SEA
Economic sustainability Indicators	Total turnover and employment for affected companies/industries	Revenue and Profitability	Employment	ECHA_SEA
Economic sustainability Indicators	The share of turnover under the proposed restriction for each company in the supply chain	Revenue and Profitability	Revenues	ECHA_SEA
Economic sustainability Indicators	Value added by end product and in intermediate steps	Revenue and Profitability	Revenues	ECHA_SEA
Economic sustainability Indicators	Change in income stemming from changes in permitting or taxed activities	Regulatory and Compliance Costs	Revenues	ECHA_SEA
Environmental Sustainability Indicators	Soil quality impairment	Soil Quality	Soil Quality	ECHA_SEA
Economic sustainability Indicators	Number of companies along the supply chain	Supply Chain and Production	Supply chain traceability	ECHA_SEA
Social sustainability Indicators	Change in average wages and salary	Wages and Salaries	Wages and Salaries	ECHA_SEA
Environmental Sustainability Indicators	Water consumption/abstraction	Water Consumption	Water Consumption	ECHA_SEA
Environmental Sustainability Indicators	Water quality impairment	Water Pollution	Water Pollution	ECHA_SEA
Social sustainability Indicators	Change in equality – gender, race, ethnic origin	-	Work Fairness	ECHA_SEA
Social sustainability Indicators	Change in worker rights and protection	Worker Rights	Worker Rights	ECHA_SEA
Social sustainability Indicators	Change in the good labour criteria of ILO	Labour Standards	Worker Rights	ECHA_SEA
Social sustainability Indicators	Change in demand for management positions	Labour Demand	Workplace Conditions	ECHA_SEA
Social sustainability Indicators	Working environment	Workplace Conditions	Workplace Conditions	ECHA_SEA
Social sustainability Indicators	Change in job quality	Workplace Conditions	Workplace Conditions	ECHA_SEA
Social sustainability Indicators	Change in working hours / patterns (e.g. more part time or shift work)	Workplace Conditions	Workplace Conditions	ECHA_SEA
Environmental Sustainability Indicators	Closure and rehabilitation	Other Environmental Impacts	Remediation of contamination activities/sites	GRI_standards
Environmental Sustainability Indicators	Asset integrity and critical incident management	Other Environmental Impacts	Asset integrity and critical incident management	GRI_standards
Environmental Sustainability Indicators	Biodiversity	Biodiversity	Biodiversity	GRI_standards
Environmental Sustainability Indicators	Climate adaptation resilience, and transition	-	Climate Change	GRI_standards
Social sustainability Indicators	Conflict and security	Conflict Management	Conflicts Management	GRI_standards
Social sustainability Indicators	describe the methodologies and assumptions used to compile the data	Data Transparency	Data management and Transparency	GRI_standards
Social sustainability Indicators	report contextual information necessary to understand the data reported	Data Transparency	Data management and Transparency	GRI_standards
Social sustainability Indicators	report contextual information necessary to understand the data and how the data has been compiled	-	Data management and Transparency	GRI_standards
Economic sustainability Indicators	Economic impacts	Other Business Indicators	Other costs	GRI_standards
Economic sustainability Indicators	describe significant changes compared to the previous reporting period.	-	Economic Benefits	GRI_standards
Environmental Sustainability Indicators	GHG Emissions	Emissions	Emissions	GRI_standards
Environmental Sustainability Indicators	Air emissions	Emissions	Emissions	GRI_standards
Social sustainability Indicators	Employment practices	Employment	Employment	GRI_standards
Social sustainability Indicators	Anti-corruption	Ethical Practices	Corporate Social Responsibility	GRI_standards
Economic sustainability Indicators	Anti-competitive behavior	Other Business Indicators	Corporate Social Responsibility	GRI_standards
Social sustainability Indicators	Forced labor and modern slavery	Labour Rights	Forced Labour	GRI_standards
Social sustainability Indicators	Rights of indigenous people	Indigenous Rights	Indigenous Rights	GRI_standards
Environmental Sustainability Indicators	Land and resource rights	Other Environmental Impacts	Land Consumption	GRI_standards
Social sustainability Indicators	Local communities	Community Engagement	Impacts on local communities	GRI_standards
Economic sustainability Indicators	the organization’s activities, products, services, and markets served	-	Supply chain traceability	GRI_standards
Economic sustainability Indicators	the organization’s supply chain	Supply Chain and Production	Supply chain traceability	GRI_standards
Economic sustainability Indicators	the entities downstream from the organization and their activities	Downstream User Costs	Supply chain traceability	GRI_standards
Economic sustainability Indicators	report the sector(s) in which it is active	Other Business Indicators	Supply chain traceability	GRI_standards
Economic sustainability Indicators	report other relevant business relationships	Other Business Indicators	Supply chain traceability	GRI_standards
Social sustainability Indicators	report the ratio of the annual total compensation for the organization’s highest-paid individual to the median annual total compensation for all employees(excluding the highest-paid individual);	-	Wages and Salaries	GRI_standards
Social sustainability Indicators	report the ratio of the percentage increase in annual total compensation for the organization’s highest-paid individual to the median percentage increase in annual total compensation for all employees (excluding the highest-paid individual)	-	Wages and Salaries	GRI_standards
Environmental Sustainability Indicators	Waste	Sustainability Gaps	Waste production and management	GRI_standards
Environmental Sustainability Indicators	Water and effluents	Water Pollution	Waste production and management	GRI_standards
Social sustainability Indicators	report the total number of workers who are not employees and whose work is controlled by the organization	Labour Force	Workplace Conditions	GRI_standards
Social sustainability Indicators	describe the process for designing its remuneration policies and for determining remuneration	-	Workplace Conditions	GRI_standards
Social sustainability Indicators	report the total number of employees, and a breakdown of this total by gender and by region	-	Work Fairness	GRI_standards
Social sustainability Indicators	permanent employees, and a breakdown by gender and by region	-	Work Fairness	GRI_standards
Social sustainability Indicators	temporary employees, and a breakdown by gender and by region	-	Work Fairness	GRI_standards
Social sustainability Indicators	non-guaranteed hours employees, and a breakdown by gender and by region	-	Work Fairness	GRI_standards
Social sustainability Indicators	full-time employees, and a breakdown by gender and by region	-	Work Fairness	GRI_standards
Social sustainability Indicators	part-time employees, and a breakdown by gender and by region	-	Work Fairness	GRI_standards
Social sustainability Indicators	Non-discrimination and equal opportunity	Social Equity	Work Fairness	GRI_standards
Social sustainability Indicators	describe significant fluctuations in the number of employees during the reporting period and between reporting periods	-	Employment	GRI_standards
Environmental Sustainability Indicators	photochemical oxidation potential (PCOP),	Climate Change	Air Quality	ISA_chemicals
Environmental Sustainability Indicators	global warming potential (GWP)	Climate Change	Climate Change	ISA_chemicals
Economic sustainability Indicators	raw material costs (feedstock, catalysts, gases, oxidants, solvents, etc.)	-	Materials costs	ISA_chemicals
Economic sustainability Indicators	process operation costs (water, energy requirements, labor, etc.)	-	Manufacturing costs	ISA_chemicals
Economic sustainability Indicators	capital cost (waste treatment infrastructure is included)	Investment Costs	Capital costs	ISA_chemicals
Environmental Sustainability Indicators	aquatic toxicity potential (ATP)	Aquatic Toxicity	Eco-Toxicity	ISA_chemicals
Environmental Sustainability Indicators	terrestrial toxicity potential (TTP)	Terrestrial Toxicity	Eco-Toxicity	ISA_chemicals
Environmental Sustainability Indicators	eutrophication potential (EP)	Water Pollution	Eutrophication	ISA_chemicals
Environmental Sustainability Indicators	human toxicity potential by ingestion (HTPI)	Human Toxicity	Human Toxicity	ISA_chemicals
Environmental Sustainability Indicators	human toxicity potential by exposure both dermal and inhalation (HTPE)	Human Toxicity	Human Toxicity	ISA_chemicals
Environmental Sustainability Indicators	ozone depletion potential (ODP)	Climate Change	Ozone depletion	ISA_chemicals
Environmental Sustainability Indicators	acidiﬁcation potential (AP)	Soil Quality	Soil Quality	ISA_chemicals
Social sustainability Indicators	are there any positive impacts (opportunities) that can be related with the new materials? e.g. technology development, local employment, decrease health and safety risk		Innovation and R&D	ivl_LCBROM
Social sustainability Indicators	any opportunity during risk handling?		Innovation and R&D	ivl_LCBROM
Social sustainability Indicators	can the use of new materials have a negative or positive impact on consumer's and/or children's health & safety?		Consumer Benefits	ivl_LCBROM
Social sustainability Indicators	can the use of new materials have a negative or positive impact on consumer's and/or children's health & safety?		Child Welfare	ivl_LCBROM
Environmental Sustainability Indicators	recycling potential?		Circular Economy	ivl_LCBROM
Economic Sustainability Indicators	are there any potential economic benefits for end-users, such as lower maintainance or operational costs?		Use costs	ivl_LCBROM
Economic Sustainability Indicators	will the new material or process increase/save production costs? if so, how?		Manufacturing costs	ivl_LCBROM
Environmental Sustainability Indicators	are some of the ingredients toxic in production? how closed is the process, is there a risk of leakage?		Eco-Toxicity	ivl_LCBROM
Environmental Sustainability Indicators	any release of toxic chemicals during use or maintenance of the product?		Eco-Toxicity	ivl_LCBROM
Environmental Sustainability Indicators	emissions from material production?		Emissions	ivl_LCBROM
Environmental Sustainability Indicators	energy for activation and production of the products, transportation?		Energy Consumption	ivl_LCBROM
Environmental Sustainability Indicators	electricity for operation (how much or energy-intensive process?)		Energy Consumption	ivl_LCBROM
Economic Sustainability Indicators	could the new material or process enable new market opportunities or applications?		Market dimension and Application Potential	ivl_LCBROM
Environmental Sustainability Indicators	any non-renewable resources such as scarce metals?		Critical materials	ivl_LCBROM
Social sustainability Indicators	are there any occupational health & safety risks for workers that will raise with new materials?		Occupational safety	ivl_LCBROM
Social sustainability Indicators	will the new materials bring risks for the workers during the waste handling?		Occupational safety	ivl_LCBROM
Economic Sustainability Indicators	how will the materials affect supply chain dynamic and market competitiveness?		Supply chain traceability	ivl_LCBROM
Economic Sustainability Indicators	how will the materials affect supply chain dynamic and market competitiveness?		Market dimension and Application Potential	ivl_LCBROM
Environmental Sustainability Indicators	landfill? toxic emissions from incineration?		Waste production and management	ivl_LCBROM
Economic Sustainability Indicators	will the disposal of the new materials require additional costs? e.g new recycling infrastructure		Waste management costs	ivl_LCBROM
Economic Sustainability Indicators	could the use of the new material reduce long-term costs for waste management, such as lower emissions or improved recyclability?		Waste management costs	ivl_LCBROM
Environmental Sustainability Indicators	incineration? landfill? recycling? energy use or potential energy recovery?		Waste production and management	ivl_LCBROM
Environmental Sustainability Indicators	incineration? landfill? recycling? energy use or potential energy recovery?		Energy Consumption	ivl_LCBROM
Environmental Sustainability Indicators	any process chemicals, cleaning?		Innovation and R&D	ivl_LCBROM
Environmental Sustainability Indicators	Has your company implemented measures to address the product's impact on animals?		Animal Welfare	SUNRISE_WP3
Environmental Sustainability Indicators	Is your company aware how the product influences animal wellbeing?		Animal Welfare	SUNRISE_WP3
Environmental Sustainability Indicators	Does the production of the to-be-developed product emit bioaccumulative substances?		Persistent, bioaccumulative and toxic	SUNRISE_WP3
Environmental Sustainability Indicators	Does the waste treatment of the to-be-developed product emit bioaccumulative substances?		Persistent, bioaccumulative and toxic	SUNRISE_WP3
Environmental Sustainability Indicators	Is the product bioaccumulative?		Persistent, bioaccumulative and toxic	SUNRISE_WP3
Economic Sustainability Indicators	Has your company implemented measures to address end-of-life concerns of the product?		Circular Economy	SUNRISE_WP3
Environmental Sustainability Indicators	Is the to-be-developed product designed for easy disassembly to improve recyclability?		Circular Economy	SUNRISE_WP3
Environmental Sustainability Indicators	Does the product design allow for easy disassembly and separation of components for recycling?		Circular Economy	SUNRISE_WP3
Environmental Sustainability Indicators	Is the product recyclable at the end of its life?		Circular Economy	SUNRISE_WP3
Environmental Sustainability Indicators	Is the product under development designed to integrate recyclability considerations?		Circular Economy	SUNRISE_WP3
Environmental Sustainability Indicators	Is the to-be-developed product designed for easy repair and maintenance to extend its lifespan?		Circular Economy	SUNRISE_WP3
Environmental Sustainability Indicators	Is the product designed for straightforward repair?		Circular Economy	SUNRISE_WP3
Environmental Sustainability Indicators	Is the to-be-developed product designed for reusability or remanufacturing to support a circular economy?		Circular Economy	SUNRISE_WP3
Environmental Sustainability Indicators	Is the product suitable for reuse without significant modifications?		Circular Economy	SUNRISE_WP3
Environmental Sustainability Indicators	Are any by-products or co-products from the production process being reused or sold?		Circular Economy	SUNRISE_WP3
Environmental Sustainability Indicators	Can by-products or co-products from the production be utilized again?		Circular Economy	SUNRISE_WP3
Social Sustainability Indicators	Has your company implemented measures to ensure consumer benefits?		Consumer Benefits	SUNRISE_WP3
Social Sustainability Indicators	Has your company implemented measures to ensure consumer privacy?		Consumer Benefits	SUNRISE_WP3
Economic Sustainability Indicators	Is the to-be-developed product eligible for sustainability certification or eco-labeling?		Corporate Social Responsibility	SUNRISE_WP3
Environmental Sustainability Indicators	Has your company implemented measures to reduce dangerous emissions for non-living environment?		Corporate Social Responsibility	SUNRISE_WP3
Economic sustainability Indicators	Has your company implemented measures to improve other efficiency and performance indicators?		Other costs	SUNRISE_WP3
Environmental Sustainability Indicators	Has your company implemented measures to address the product's impact on humans?		Corporate Social Responsibility	SUNRISE_WP3
Environmental Sustainability Indicators	Has your company implemented measures to address the product's impact on plants?		Corporate Social Responsibility	SUNRISE_WP3
Social Sustainability Indicators	Has your company implemented measures to improve livelihood and well-being?		Corporate Social Responsibility	SUNRISE_WP3
Social Sustainability Indicators	Is the to-be-developed product designed to be cost-effective while maintaining high sustainability standards?		Cost-effectiveness	SUNRISE_WP3
Environmental Sustainability Indicators	Are other critical materials used? See EU List		Critical materials	SUNRISE_WP3
Environmental Sustainability Indicators	Is the product under development designed to include biodegradable components to reduce environmental impact?		Environmental exposure, fate, stability and transformation	SUNRISE_WP3
Social Sustainability Indicators	Are there any direct economic benefits for the user in using the innovative product?		Consumer Benefits	SUNRISE_WP3
Social Sustainability Indicators	Does the product contribute to the provision of a basic social service? E.g., Food, Energy, Communication, Transport, Health?		Social improvement	SUNRISE_WP3
Social Sustainability Indicators	Is the to-be-developed product designed for long-term durability and an extended lifespan?		Functionality	SUNRISE_WP3
Environmental Sustainability Indicators	Has your company implemented measures to reduce the use of dangerous materials for living environment?		Eco-Toxicity	SUNRISE_WP3
Environmental Sustainability Indicators	Does the product contain substances that may cause acute environmental toxicity?		Eco-Toxicity	SUNRISE_WP3
Environmental Sustainability Indicators	Does the product contain substances linked to chronic environmental toxicity?		Eco-Toxicity	SUNRISE_WP3
Environmental Sustainability Indicators	Does the product exhibit fiber-like properties (e.g., high aspect ratio ≥ 3)?		Eco-Toxicity	SUNRISE_WP3
Environmental Sustainability Indicators	Does the product include persistent, mobile, and toxic (PMT), very persistent and very bioaccumulative (vPvB) or very persistent and very mobile (vPvM) materials?		Environmental exposure, fate, stability and transformation	SUNRISE_WP3
Environmental Sustainability Indicators	Does the product pose physical hazards such as being flammable, explosive, or corrosive?		Eco-Toxicity	SUNRISE_WP3
Environmental Sustainability Indicators	Has your company implemented measures to reduce dangerous pollution for living environment?		Eco-Toxicity	SUNRISE_WP3
Environmental Sustainability Indicators	Can emissions of chemicals and NM to air be minimized during manufacturing?		Emissions	SUNRISE_WP3
Environmental Sustainability Indicators	Were greenhouse gas emissions considered in designing the use of the product?		Emissions	SUNRISE_WP3
Environmental Sustainability Indicators	Were emissions of greenhouse gases considered in the material design phase?		Emissions	SUNRISE_WP3
Environmental Sustainability Indicators	Was the reduction of greenhouse gases taken into account in the product design?		Emissions	SUNRISE_WP3
Environmental Sustainability Indicators	Were air emissions considered during the design for product use?		Emissions	SUNRISE_WP3
Environmental Sustainability Indicators	Is the to-be-developed product designed to minimize carbon emissions during the manufacturing process?		Emissions	SUNRISE_WP3
Environmental Sustainability Indicators	Is the product under development designed to minimize Volatile Organic Compounds emissions during production?		Emissions	SUNRISE_WP3
Environmental Sustainability Indicators	Can chemical and NM Emissions to Water during manufacturing be reduced?		Emissions	SUNRISE_WP3
Environmental Sustainability Indicators	Can you reduce emissions of chemical and of NM to water generated during manufacturing?		Emissions	SUNRISE_WP3
Environmental Sustainability Indicators	Are there strategies to lower chemical and NM Emissions to Water during production?		Emissions	SUNRISE_WP3
Environmental Sustainability Indicators	Can you reduce emissions of chemical and of NM to water generated during the production process?		Emissions	SUNRISE_WP3
Environmental Sustainability Indicators	Can you reduce emissions of chemicals and of NM to air generated during manufacturing?		Emissions	SUNRISE_WP3
Environmental Sustainability Indicators	Are there strategies to reduce chemicals and NM Emissions to Air during production?		Emissions	SUNRISE_WP3
Environmental Sustainability Indicators	Can you reduce emissions of chemicals and of NM to air generated during the production process?		Emissions	SUNRISE_WP3
Environmental Sustainability Indicators	Does the to-be-developed product reduce soil emissions during its manufacturing?		Emissions	SUNRISE_WP3
Environmental Sustainability Indicators	Does the to-be-developed product reduce soil emissions during its use phase?		Emissions	SUNRISE_WP3
Environmental Sustainability Indicators	Were emissions to water considered during the design for product use?		Emissions	SUNRISE_WP3
Environmental Sustainability Indicators	Will there be emissions of synthetic, i.e. non-natural substances during production, manufacture, use or end-of life of the product?		Emissions	SUNRISE_WP3
Environmental Sustainability Indicators	Is the product under development designed to integrate energy-efficient design for reduced energy consumption during use?		Energy Consumption	SUNRISE_WP3
Environmental Sustainability Indicators	Was energy efficiency considered in the material design (e.g., by optimizing temperature or pressure)?		Energy Consumption	SUNRISE_WP3
Environmental Sustainability Indicators	Was energy consumption optimized in the design of product usage?		Energy Consumption	SUNRISE_WP3
Environmental Sustainability Indicators	Is energy consumption optimized in the production of the product?		Energy Consumption	SUNRISE_WP3
Economic Sustainability Indicators	Has your company implemented measures to ensure production benefits of the to-be-developed product?		Functionality	SUNRISE_WP3
Social sustainability Indicators	Will the to-be-developed product meet societal needs?		Functionality	SUNRISE_WP3
Social sustainability Indicators	Does the to-be-developed product meet the social needs explicitly mentioned in the future agenda of the EU or the respective member state?		Functionality	SUNRISE_WP3
Social sustainability Indicators	Does the to-be-developed product offer a benefit for society?		Functionality	SUNRISE_WP3
Social sustainability Indicators	Is the product under development designed to meet existing customer needs?		Functionality	SUNRISE_WP3
Economic sustainability Indicators	Has your company implemented measures to ensure the geographical accessibility of the product?		Geographical Accessibility of the Product	SUNRISE_WP3
Economic sustainability Indicators	Has your company evaluated the economic potential of the to-be-developed product?		Market dimension and Application Potential	SUNRISE_WP3
Social sustainability Indicators	Has your company estimated the market potential of the to-be-developed product?		Market dimension and Application Potential	SUNRISE_WP3
Social sustainability Indicators	Has your company checked the to-be-developed product's potential for dual use?		Market dimension and Application Potential	SUNRISE_WP3
Environmental Sustainability Indicators	Is renewable energy utilized in general for production?		Renewable Energy	SUNRISE_WP3
Environmental Sustainability Indicators	Is renewable energy used during manufacturing?		Renewable Energy	SUNRISE_WP3
Environmental Sustainability Indicators	Does the product contribute to ozone layer depletion?		Ozone depletion	SUNRISE_WP3
Environmental Sustainability Indicators	Do you use bio-based materials for packaging?		Packaging optimization	SUNRISE_WP3
Environmental Sustainability Indicators	Can packaging usage be minimized?		Packaging optimization	SUNRISE_WP3
Environmental Sustainability Indicators	Is the to-be-developed product designed to minimize packaging waste?		Packaging optimization	SUNRISE_WP3
Environmental Sustainability Indicators	Are there opportunities to improve the material or process yield?		Process Optimization	SUNRISE_WP3
Economic sustainability Indicators	Are you expecting reduced production costs?		Manufacturing costs	SUNRISE_WP3
Environmental Sustainability Indicators	Is it possible to decrease the use of primary raw materials?		Resource Efficiency	SUNRISE_WP3
Environmental Sustainability Indicators	Has your company implemented decrease the total Resource use?		Resource Efficiency	SUNRISE_WP3
Economic sustainability Indicators	Has your company implemented measures to ensure profitability with the to-be-developed product?		Revenues	SUNRISE_WP3
Economic sustainability Indicators	Is the product under development a technological novelty?		Innovation and R&D	SUNRISE_WP3
Social sustainability Indicators	Is the product under development designed to provide clear and transparent sustainability information to consumers?		Data management and Transparency	SUNRISE_WP3
Social sustainability Indicators	Is clear end-of-life information provided through labels or documentation?		Data management and Transparency	SUNRISE_WP3
Environmental Sustainability Indicators	Is the product under development designed to use renewable or recycled materials in its raw material extraction phase?		Waste production and management	SUNRISE_WP3
Environmental Sustainability Indicators	Is it possible to recycle waste generated during production?		Waste production and management	SUNRISE_WP3
Environmental Sustainability Indicators	Can the waste produced during the production process be recycled?		Waste production and management	SUNRISE_WP3
Environmental Sustainability Indicators	Is the product under development designed to minimize raw material waste during production?		Waste production and management	SUNRISE_WP3
Environmental Sustainability Indicators	Can waste generated during product usage be reduced?		Waste production and management	SUNRISE_WP3
Environmental Sustainability Indicators	Can production-related waste be minimized?		Waste production and management	SUNRISE_WP3
Environmental Sustainability Indicators	Is the product under development designed to incorporate features to reduce water consumption operation?		Water Consumption	SUNRISE_WP3
Environmental Sustainability Indicators	Is water consumption during manufacturing reduced?		Water Consumption	SUNRISE_WP3
Environmental Sustainability Indicators	Can water use be reduced during the production process?		Water Consumption	SUNRISE_WP3
Environmental Sustainability Indicators	Was water efficiency a factor in the product use design?		Water Consumption	SUNRISE_WP3
Environmental Sustainability Indicators	Is the product under development designed to minimize water usage manufacturing and processing phase?		Water Consumption	SUNRISE_WP3
Social sustainability Indicators	Has your company implemented measures to ensure high quality of labor development?		Workplace Conditions	SUNRISE_WP3
Social sustainability Indicators	Is your company processing nanomaterial for the product?		Consumer Health and Safety	SUNRISE_WP3
Social sustainability Indicators	Is your company producing nanomaterial for the product?		Consumer Health and Safety	SUNRISE_WP3
Social sustainability Indicators	Does the production of the application lead to a substantial improvement in the development of a highly qualified labour force compared to the conventional alternative?	Labour Development	Employment	LicaraNanoSCAN
Environmental Sustainability Indicators	Established recycling systems (glass, PET, paper, carton, batteries, biowaste, electronic devices, etc.) exposed to the nanomaterial in the product?	Waste Management	Circular Economy	LicaraNanoSCAN
Environmental Sustainability Indicators	Emissions to the air or (waste) water from the manufacturing process itself?	Emissions	Emissions	LicaraNanoSCAN
Environmental Sustainability Indicators	Emissions of hazardous substances to air, water and/or solid?	Emissions	Emissions	LicaraNanoSCAN
Environmental Sustainability Indicators	Energy consumption of the manufacturing process?	Energy Consumption	Energy Consumption	LicaraNanoSCAN
Economic sustainability Indicators	What are the operational costs (i.e. maintenance, energy use etc) during the use phase of the nanobased product or application compared to those of the conventional one? (Think of advantages due to nanoproperties in the manufacturing process)	Energy Consumption	Manufacturing costs	LicaraNanoSCAN
Environmental Sustainability Indicators	use phase of the nanoproduct versus that of the conventional product (only for final products and articles)	Product Lifecycle	Functionality	LicaraNanoSCAN
Environmental Sustainability Indicators	Product life time (use phase)?	Circular Economy	Functionality	LicaraNanoSCAN
Environmental Sustainability Indicators	Need for maintenance?	Circular Economy	Functionality	LicaraNanoSCAN
Environmental Sustainability Indicators	Efficiency of use?	Resource Efficiency	Functionality	LicaraNanoSCAN
Environmental Sustainability Indicators	End-of-life of the nanoproduct versus that of the conventional product (only for final products and articles).	Product Lifecycle	Functionality	LicaraNanoSCAN
Environmental Sustainability Indicators	End-of-life of the nanoproduct versus that of the conventional product (only for final products and articles).	Product Lifecycle	Functionality	LicaraNanoSCAN
Social sustainability Indicators	nanoproduct versus those of the conventional product.	Product Comparison	Functionality	LicaraNanoSCAN
Economic sustainability Indicators	Does the nanoproduct have increased marketability due to an improved functionality or a new functionality (for example: UV-protection, enhanced photolytical self-cleaning/ self-cleaning capacity/property, conductible, antimicrobial function), or a clear image advantage compared to that of the conventional product (e.g.: more resistant to environmental effects, prolonged lifetime/persistence, redu…	Product Improvement	Functionality	LicaraNanoSCAN
Environmental Sustainability Indicators	Amounts of hazardous substances used in the manufacture?	Eco-Toxicity	Hazardous substances or materials	LicaraNanoSCAN
Environmental Sustainability Indicators	Amounts of hazardous substances used in maintenance?	Eco-Toxicity	Hazardous substances or materials	LicaraNanoSCAN
Economic sustainability Indicators	development stage of the nanoproduct versus that of the conventional product	Innovation and R&D	Innovation and R&D	LicaraNanoSCAN
Environmental Sustainability Indicators	manufacturing phase of the nanoproduct versus that of the conventional product.	Manufacturing Comparison	Manufacturing Comparison	LicaraNanoSCAN
Economic sustainability Indicators	market potential of the nanoproduct versus that of the conventional product	Market and Application Potential	Market dimension and Application Potential	LicaraNanoSCAN
Economic sustainability Indicators	What is the foreseen market potential of the nanoproduct or -application in Europe?	Market and Application Potential	Market dimension and Application Potential	LicaraNanoSCAN
Economic sustainability Indicators	What is the time-to-market to manufacture the nanoproduct on a commercial scale?	Market and Application Potential	Market dimension and Application Potential	LicaraNanoSCAN
Environmental Sustainability Indicators	Efforts needed to produce the product using the nanomaterial?	Process Optimization	Process Optimization	LicaraNanoSCAN
Economic sustainability Indicators	What is the (expected) purchase price per unit of the nanobased product or material compared to that of the conventional one?	Consumer Costs	Use costs	LicaraNanoSCAN
Regulatory Indicators	Is your nanomaterial approved or notified according to relevant EU-legislation (e.g. EU Nr. 1907/2006 (REACH), The EU Biocides Regulation 528/2012 (EU BPR), Regulation (EC) No 1223/2009 on cosmetic products …)	-	Chemical/material within the scope of availalbe legislations	LicaraNanoSCAN
Regulatory Indicators	Do you use the nanomaterial below its specific concentration limits recommended in the legal framework (e.g. http://ec.europa.eu/environment/chemicals/biocides/active-substances/approved-substances_en.htm)	Regulatory Compliance	Chemical/material within the scope of availalbe legislations	LicaraNanoSCAN
Environmental Sustainability Indicators	Materials consumption in this manufacturing process?	Resource Efficiency	Resource Efficiency	LicaraNanoSCAN
Economic sustainability Indicators	profitability of the nanoproduct versus that of the conventional product	Revenue and Profitability	Revenues	LicaraNanoSCAN
Social sustainability Indicators	Does the use or application of the nano-based product lead to improvements in feeding the world's population, a marked increase in food production and/or the nutritional value of food? OR Does the use or application of the nano-based product lead to improvements in people's health, particularly the direct user, e.g. by improvements in water purity, sanitation or medicines and pharmaceuticals?	-	Social improvement	LicaraNanoSCAN
Social sustainability Indicators	Could the use or application of the nanoproduct be considered a technological breakthrough compared to the conventional alternative?	Technological Innovation	Innovation and R&D	LicaraNanoSCAN
Environmental Sustainability Indicators	Amount of solid waste from the manufacturing process?	Waste Management	Waste production and management	LicaraNanoSCAN
Environmental Sustainability Indicators	Amount of waste water from the manufacturing process?	Waste Management	Waste production and management	LicaraNanoSCAN
Environmental Sustainability Indicators	Amount of solid waste from using the product?	Waste Management	Waste production and management	LicaraNanoSCAN
Environmental Sustainability Indicators	Amount of waste water resulting from use of the product?	Waste Management	Waste production and management	LicaraNanoSCAN
Environmental Sustainability Indicators	Volume of waste (due to e.g. longer lifetime, less weight, less material used)?	Waste Management	Waste production and management	LicaraNanoSCAN
Environmental Sustainability Indicators	Amounts of other hazardous substances released from the waste water treatment?	Waste Management	Waste production and management	LicaraNanoSCAN
Environmental Sustainability Indicators	Amounts of other hazardous substances released during incineration?	Eco-Toxicity	Waste production and management	LicaraNanoSCAN
Environmental Sustainability Indicators	Can the waste water treatment facility eliminate the nanoproduct's emissions?	Emissions	Waste production and management	LicaraNanoSCAN
Environmental Sustainability Indicators	Can the waste incineration facility eliminate the nanoproduct's emissions?	Emissions	Waste production and management	LicaraNanoSCAN
Regulatory Indicators	Are you aware of existing legisation (e.g. EU Nr. 1907/2006 (REACH), The EU Biocides Regulation 528/2012 (EU BPR), Regulation (EC) No 1223/2009 on cosmetic products …)	-	Chemical/material within the scope of availalbe legislations	LicaraNanoSCAN
Social sustainability Indicators	price of the product	Affordability	Use costs	Screening MCDA NANORIGO
Economic sustainability Indicators	accessibility to consumers	Consumer Costs	Use costs	Screening MCDA NANORIGO
Economic sustainability Indicators	additional costs for users	Consumer Costs	Use costs	Screening MCDA NANORIGO
Environmental Sustainability Indicators	recyclability	Circular Economy	Circular Economy	Screening MCDA NANORIGO
Environmental Sustainability Indicators	special treatments for recycling	Circular Economy	Circular Economy	Screening MCDA NANORIGO
Economic sustainability Indicators	contribution to circular economy	Environmental and Social Costs	Circular Economy	Screening MCDA NANORIGO
Environmental Sustainability Indicators	greenhouse gas contribution	Climate Change	Climate Change	Screening MCDA NANORIGO
Social sustainability Indicators	contribution to sustainable development goals	Sustainable Development	Contribution to SDGs	Screening MCDA NANORIGO
Environmental Sustainability Indicators	rare element usage	Resource Efficiency	Critical materials	Screening MCDA NANORIGO
Social sustainability Indicators	diversity of technological options for important societal services	Technological Diversity	Diversity of technological options	Screening MCDA NANORIGO
Environmental Sustainability Indicators	emissions	Regulatory and Compliance Costs	Emissions	Screening MCDA NANORIGO
Environmental Sustainability Indicators	overall hazardous emissions	Emissions	Emissions	Screening MCDA NANORIGO
Environmental Sustainability Indicators	emissions to air	Emissions	Emissions	Screening MCDA NANORIGO
Environmental Sustainability Indicators	emissions to water	Emissions	Emissions	Screening MCDA NANORIGO
Environmental Sustainability Indicators	emissions to soil	Emissions	Emissions	Screening MCDA NANORIGO
Environmental Sustainability Indicators	overall hazardous emissions	Emissions	Emissions	Screening MCDA NANORIGO
Social sustainability Indicators	employment	Revenue and Profitability	Employment	Screening MCDA NANORIGO
Social sustainability Indicators	employee safety	Workplace Safety	Workplace Conditions	Screening MCDA NANORIGO
Social sustainability Indicators	special measures for employees	Employee Welfare	Employment	Screening MCDA NANORIGO
Environmental Sustainability Indicators	energy consumption	Energy Consumption	Energy Consumption	Screening MCDA NANORIGO
Environmental Sustainability Indicators	energy consumption from renewable energy	Energy Consumption	Chemical/material within the scope of availalbe legislations	Screening MCDA NANORIGO
Social sustainability Indicators	reduction of dependency/ies on energy	Resource Independence	Resource Independence	Screening MCDA NANORIGO
Environmental Sustainability Indicators	water eutrophication through nitrogen and phosphorus	Water Pollution	Eutrophication	Screening MCDA NANORIGO
Social sustainability Indicators	improved functionality	Market and Application Potential	Functionality	Screening MCDA NANORIGO
Economic sustainability Indicators	novel/innovative functionality	Technological Innovation	Functionality	Screening MCDA NANORIGO
Social sustainability Indicators	effect on product's service life	Product Lifecycle	Functionality	Screening MCDA NANORIGO
Economic sustainability Indicators	potential for dual use	Dual-Use Technology	Functionality	Screening MCDA NANORIGO
Economic sustainability Indicators	human life insurance costs	Environmental and Social Costs	Other costs	Screening MCDA NANORIGO
Economic sustainability Indicators	qualifies labour force	Labour and Training Costs	Personell costs	Screening MCDA NANORIGO
Social sustainability Indicators	geographical accessibility of the product	Product Accessibility	Impacts on local communities	Screening MCDA NANORIGO
Environmental Sustainability Indicators	ozone depletion	Climate Change	Ozone depletion	Screening MCDA NANORIGO
Environmental Sustainability Indicators	resource consumption	Resource Efficiency	Resource Efficiency	Screening MCDA NANORIGO
Environmental Sustainability Indicators	mineral resource depletion	Resource Efficiency	Resource Efficiency	Screening MCDA NANORIGO
Social sustainability Indicators	reduction of dependency/ies on resources	Resource Independence	Resource Independence	Screening MCDA NANORIGO
Social sustainability Indicators	effect on social/economic inequity	Social Equity	Work Fairness	Screening MCDA NANORIGO
Social sustainability Indicators	societal resilience	Community Resilience	Community Resilience	Screening MCDA NANORIGO
Social sustainability Indicators	societal needs or objectives	Societal Impact	Functionality	Screening MCDA NANORIGO
Social sustainability Indicators	reduction of dependency/ies	Resource Independence	Resource Independence	Screening MCDA NANORIGO
Social sustainability Indicators	societal needs or objectives	Societal Impact	Functionality	Screening MCDA NANORIGO
Environmental Sustainability Indicators	soil acidification	Soil Quality	Soil Quality	Screening MCDA NANORIGO
Economic sustainability Indicators	vertical range of manufacture	Supply Chain and Production	Supply chain traceability	Screening MCDA NANORIGO
Economic sustainability Indicators	ratio of in-house/external manufacturing of NM	Supply Chain and Production	Supply chain traceability	Screening MCDA NANORIGO
Economic sustainability Indicators	technological advancement	Technological Innovation	Innovation and R&D	Screening MCDA NANORIGO
Economic sustainability Indicators	specil manufacturing technology	-	Innovation and R&D	Screening MCDA NANORIGO
Economic sustainability Indicators	contribution to an enabling technology	Enabling Technologies	Innovation and R&D	Screening MCDA NANORIGO
Social sustainability Indicators	breakthrough potential	Technological Breakthrough	Innovation and R&D	Screening MCDA NANORIGO
Environmental Sustainability Indicators	disposal management	Waste Management	Waste production and management	Screening MCDA NANORIGO
Environmental Sustainability Indicators	waste production	Waste Management	Waste production and management	Screening MCDA NANORIGO
Environmental Sustainability Indicators	special measures for disposal	Waste Management	Waste production and management	Screening MCDA NANORIGO
Environmental Sustainability Indicators	non-recyclable solid waste	Waste Management	Waste production and management	Screening MCDA NANORIGO
Environmental Sustainability Indicators	wastewater	Water Pollution	Waste production and management	Screening MCDA NANORIGO
Environmental Sustainability Indicators	water consumption	Water Consumption	Water Consumption	Screening MCDA NANORIGO
Environmental Sustainability Indicators	use of water in a water-scarce region	Water Consumption	Water Consumption	Screening MCDA NANORIGO
Environmental Sustainability Indicators	availability of fresch water for ecosystems	Water Consumption	Water Consumption	Screening MCDA NANORIGO
Social sustainability Indicators	reduction of dependency/ies on time	Resource Independence	Water Consumption	Screening MCDA NANORIGO
Environmental Sustainability Indicators	freedom from stress (animals)	Other Environmental Impacts	Animal Welfare	SAFA_FAO
Economic sustainability Indicators	stability of marketing	Other Business Indicators	Market dimension and Application Potential	SAFA_FAO
Economic sustainability Indicators	liquidity and insurance	Other Business Indicators	Other costs	SAFA_FAO
Environmental Sustainability Indicators	air pollution	Air Quality	Air Quality	SAFA_FAO
Environmental Sustainability Indicators	wild biodiversity	Biodiversity	Biodiversity	SAFA_FAO
Environmental Sustainability Indicators	agricultural biodiversity	Biodiversity	Biodiversity	SAFA_FAO
Environmental Sustainability Indicators	threatened species	Biodiversity	Biodiversity	SAFA_FAO
Environmental Sustainability Indicators	species-appropriate conditions	Other Environmental Impacts	Biodiversity	SAFA_FAO
Social sustainability Indicators	child labour	Child Labour	Child Labour	SAFA_FAO
Social sustainability Indicators	capacity building	Community Development	Capacity building	SAFA_FAO
Social sustainability Indicators	physical and psycho-social health	Health and Safety	Impacts on local communities	SAFA_FAO
Social sustainability Indicators	health resources	Health and Safety	Impacts on local communities	SAFA_FAO
Social sustainability Indicators	food security	Food Security	Impacts on local communities	SAFA_FAO
Good Governance Indicators	due diligence	Corporate Governance	Corporate Social Responsibility	SAFA_FAO
Good Governance Indicators	responsibility	Corporate Governance	Corporate Social Responsibility	SAFA_FAO
Good Governance Indicators	conflict resolution	Conflict Management	Conflicts Management	SAFA_FAO
Good Governance Indicators	remedy	Conflict Management	Corporate Social Responsibility	SAFA_FAO
Good Governance Indicators	restoration and prevention	Conflict Management	Corporate Social Responsibility	SAFA_FAO
Good Governance Indicators	co-responsibility	Corporate Governance	Corporate Social Responsibility	SAFA_FAO
Good Governance Indicators	resource appropriation	Resource Management	Corporate Social Responsibility	SAFA_FAO
Good Governance Indicators	certified production and sourcing	Sustainability Practices	Corporate Social Responsibility	SAFA_FAO
Environmental Sustainability Indicators	ecosystem integrity	Biodiversity	Biodiversity	SAFA_FAO
Environmental Sustainability Indicators	greenhouse gases	Climate Change	Emissions	SAFA_FAO
Social sustainability Indicators	employment	Revenue and Profitability	Employment	SAFA_FAO
Economic sustainability Indicators	employment	Revenue and Profitability	Employment	SAFA_FAO
Environmental Sustainability Indicators	energy supply	Energy Consumption	Energy Consumption	SAFA_FAO
Good Governance Indicators	corporate ethics	Corporate Governance	Corporate Social Responsibility	SAFA_FAO
Good Governance Indicators	grievance producers	Conflict Management	Corporate Social Responsibility	SAFA_FAO
Good Governance Indicators	commitment to fairness and legitimacy	Ethical Practices	Corporate Social Responsibility	SAFA_FAO
Good Governance Indicators	sustainability in quality management	Sustainability Practices	Corporate Social Responsibility	SAFA_FAO
Social sustainability Indicators	forced labour	Forced Labour	Forced Labour	SAFA_FAO
Good Governance Indicators	full-cost accounting	Transparency	Other costs	SAFA_FAO
Environmental Sustainability Indicators	habitat diversity and connectivity	Biodiversity	Habitat diversity and connectivity	SAFA_FAO
Good Governance Indicators	holistic audits	Accountability	Corporate Social Responsibility	SAFA_FAO
Social sustainability Indicators	indigenous people	Indigenous Rights	Indigenous Rights	SAFA_FAO
Economic sustainability Indicators	internal investment	Investment Costs	Other costs	SAFA_FAO
Economic sustainability Indicators	community investment	Investment Costs	Other costs	SAFA_FAO
Economic sustainability Indicators	long-ranging investment	Investment Costs	Other costs	SAFA_FAO
Social sustainability Indicators	freedom of association and bargaining	Labour Rights	Worker Rights	SAFA_FAO
Economic sustainability Indicators	local procurement	Other Business Indicators	Employment	SAFA_FAO
Environmental Sustainability Indicators	non-renewable resources	Resource Efficiency	Renewable resources	SAFA_FAO
Environmental Sustainability Indicators	eco-efficiency	Resource Efficiency	Resource Efficiency	SAFA_FAO
Environmental Sustainability Indicators	organic matter	Soil Quality	Soil Quality	SAFA_FAO
Environmental Sustainability Indicators	land physical structure	Soil Quality	Soil Quality	SAFA_FAO
Environmental Sustainability Indicators	land chemical quality	Soil Quality	Soil Quality	SAFA_FAO
Environmental Sustainability Indicators	land degradation and desertification	Soil Quality	Soil Quality	SAFA_FAO
Good Governance Indicators	stakeholders dialogue	Stakeholders Engagement	Stakeholders Engagement	SAFA_FAO
Economic sustainability Indicators	stability of supply	Supply Chain and Production	Supply chain traceability	SAFA_FAO
Economic sustainability Indicators	stability of production	Supply Chain and Production	Supply chain traceability	SAFA_FAO
Economic sustainability Indicators	traceability	Other Business Indicators	Supply chain traceability	SAFA_FAO
Social sustainability Indicators	support to vulnerable people	Community Support	Support to vulnerable people	SAFA_FAO
Social sustainability Indicators	wage level	Wages and Salaries	Wages and Salaries	SAFA_FAO
Environmental Sustainability Indicators	waste disposal	Direct Costs	Waste production and management	SAFA_FAO
Environmental Sustainability Indicators	water quantity	Water Consumption	Water Consumption	SAFA_FAO
Environmental Sustainability Indicators	water quality	Water Pollution	Water Pollution	SAFA_FAO
Social sustainability Indicators	non-discrimination	Social Equity	Work Fairness	SAFA_FAO
Social sustainability Indicators	gender equality	Social Equity	Work Fairness	SAFA_FAO
Social sustainability Indicators	working hours	Workplace Conditions	Workplace Conditions	SAFA_FAO
Economic sustainability Indicators	product information	Other Business Indicators	Data management and Transparency	SAFA_FAO
Economic sustainability Indicators	food safety	Other Business Indicators	Food quality and safety	SAFA_FAO
Economic sustainability Indicators	food quality	Other Business Indicators	Food quality and safety	SAFA_FAO
Economic sustainability Indicators	value creation	Other Business Indicators	Market dimension and Application Potential	SAFA_FAO
Social sustainability Indicators	Nutritional status of children Mortality rate under 5 years old Life expectancy at birth	Child Welfare	Child Welfare	SLCA_exploration
Social sustainability Indicators	Life expectancy at birth	Child Welfare	Child Welfare	SLCA_exploration
Social sustainability Indicators	Immunization against infectious childhood diseases	Child Welfare	Child Welfare	SLCA_exploration
Social sustainability Indicators	Number of recorded crimes per 100,000 population Population growth rate	Demographic Trends	Criminality	SLCA_exploration
Social sustainability Indicators	Contraceptive prevalence rate Children reaching grade 5 of primary education	Education Access	Education Access	SLCA_exploration
Social sustainability Indicators	Adult secondary education achievement level	Education Access	Education Access	SLCA_exploration
Social sustainability Indicators	Adult literacy rate Floor area per person	Education Access	Education Access	SLCA_exploration
Social sustainability Indicators	Unemployment rate	Employment	Employment	SLCA_exploration
Social sustainability Indicators	Percent of population with adequate sewage disposal facilities	Sanitation Access	Healthcare Access	SLCA_exploration
Social sustainability Indicators	Percent of population with access to primary healthcare facilities	Healthcare Access	Healthcare Access	SLCA_exploration
Social sustainability Indicators	Floor area per person	Housing Quality	Housing Quality	SLCA_exploration
Social sustainability Indicators	Population with access to safe drinking water	Water Access	Impacts on local communities	SLCA_exploration
Social sustainability Indicators	Percent of population living below poverty line	Poverty Alleviation	Poverty Alleviation	SLCA_exploration
Social sustainability Indicators	Gini index of income inequality	Social Equity	Work Fairness	SLCA_exploration
Social sustainability Indicators	Population of urban formal and informal settlements	Urbanization	Capacity building	SLCA_exploration
Social sustainability Indicators	Ratio of average female wage to male wage	Gender Equity	Work Fairness	SLCA_exploration
Environmental Sustainability Indicators	Mobility	Material Stability	Environmental exposure, fate, stability and transformation	SMM
Environmental Sustainability Indicators	resource criticality	Resource Efficiency	Critical materials	SMM
Environmental Sustainability Indicators	resource efﬁciency	Resource Efficiency	Resource Efficiency	SMM
Environmental Sustainability Indicators	dissipation and release.	Resource Efficiency	Waste production and management	SMM
Social sustainability Indicators	Product impact on consumers		Consumer Benefits	Socio_economic_SSbD
Social sustainability Indicators	Local community		Impacts on local communities	Socio_economic_SSbD
Social sustainability Indicators	Value created		Market dimension and Application Potential	Socio_economic_SSbD
Social sustainability Indicators	Animal welfare		Animal Welfare	Socio_economic_SSbD
Social sustainability Indicators	Child labor		Child Labour	Socio_economic_SSbD
Social sustainability Indicators	High conflict zones		Conflict-Free Sourcing	Socio_economic_SSbD
Social sustainability Indicators	Conflict-free operations		Conflict-Free Sourcing	Socio_economic_SSbD
Social sustainability Indicators	Unemployment		Employment	Socio_economic_SSbD
Social sustainability Indicators	Corruption		Corporate Social Responsibility	Socio_economic_SSbD
Social sustainability Indicators	Corruption-free operations		Corporate Social Responsibility	Socio_economic_SSbD
Social sustainability Indicators	Forced labor		Forced Labour	Socio_economic_SSbD
Social sustainability Indicators	Access to sanitation		Healthcare Access	Socio_economic_SSbD
Social sustainability Indicators	Indigenous rights		Indigenous Rights	Socio_economic_SSbD
Social sustainability Indicators	R&D partnerships		Innovation and R&D	Socio_economic_SSbD
Social sustainability Indicators	Excessive working time		Worker Rights	Socio_economic_SSbD
Social sustainability Indicators	Access to drinking water		Impacts on local communities	Socio_economic_SSbD
Social sustainability Indicators	Migrant labour		Migrant Labour	Socio_economic_SSbD
Social sustainability Indicators	Occupational toxics and hazards		Occupational safety	Socio_economic_SSbD
Social sustainability Indicators	Poverty		Poverty Alleviation	Socio_economic_SSbD
Social sustainability Indicators	Suppliers’ assessment		Supply chain traceability	Socio_economic_SSbD
Social sustainability Indicators	Legal system		Violation of regulations	Socio_economic_SSbD
Social sustainability Indicators	Wage		Wages and Salaries	Socio_economic_SSbD
Social sustainability Indicators	End-of-life management		Waste production and management	Socio_economic_SSbD
Social sustainability Indicators	Discrimination		Work Fairness	Socio_economic_SSbD
Social sustainability Indicators	Gender equity		Work Fairness	Socio_economic_SSbD
Social sustainability Indicators	Injuries and fatalities		Workplace Conditions	Socio_economic_SSbD
Social sustainability Indicators	Non-Communicable diseases		Workplace Conditions	Socio_economic_SSbD
Social sustainability Indicators	Communicable diseases		Workplace Conditions	Socio_economic_SSbD
Environmental Sustainability Indicators	Reuse of by-product/co-product	Circular Economy	Circular Economy	TIER1B_SUNSHINE
Environmental Sustainability Indicators	Reuse of by-product/co-product	Circular Economy	Circular Economy	TIER1B_SUNSHINE
Environmental Sustainability Indicators	Repairability of product	Circular Economy	Circular Economy	TIER1B_SUNSHINE
Environmental Sustainability Indicators	Reuse of chemical substances in product	Circular Economy	Circular Economy	TIER1B_SUNSHINE
Environmental Sustainability Indicators	Recyclability: use of recycled raw materials and production of a recyclable innovative product	Circular Economy	Circular Economy	TIER1B_SUNSHINE
Environmental Sustainability Indicators	Impact on climate change from production process	Climate Change	Climate Change	TIER1B_SUNSHINE
Environmental Sustainability Indicators	Impact on climate change (LCA midpoint) from manufacturing and production process	Climate Change	Climate Change	TIER1B_SUNSHINE
Environmental Sustainability Indicators	Impact on climate change from manufacturing	Climate Change	Climate Change	TIER1B_SUNSHINE
Environmental Sustainability Indicators	Impact on climate change from product use	Climate Change	Climate Change	TIER1B_SUNSHINE
Social sustainability Indicators	Absence of armed conflicts	Conflict-Free Sourcing	Conflict-Free Sourcing	TIER1B_SUNSHINE
Social sustainability Indicators	Health and safety improvement	Health and Safety	Impacts on local communities	TIER1B_SUNSHINE
Environmental Sustainability Indicators	Critical materials	Resource Efficiency	Critical materials	TIER1B_SUNSHINE
Economic sustainability Indicators	Direct costs for raw material	Direct Costs	Materials costs	TIER1B_SUNSHINE
Economic sustainability Indicators	Direct costs of transportation for raw materials	Direct Costs	Transportation costs	TIER1B_SUNSHINE
Economic sustainability Indicators	Direct costs of waste disposal in production	Direct Costs	Waste management costs	TIER1B_SUNSHINE
Economic sustainability Indicators	Direct costs of maintenance for production	Direct Costs	Maintenance costs	TIER1B_SUNSHINE
Economic sustainability Indicators	Direct costs of installation (heating, lighting) for production	-	Manufacturing costs	TIER1B_SUNSHINE
Economic sustainability Indicators	Direct costs of waste disposal in manufacturing	Direct Costs	Waste management costs	TIER1B_SUNSHINE
Economic sustainability Indicators	Direct costs of water treatment for manufacturing	Direct Costs	Manufacturing costs	TIER1B_SUNSHINE
Economic sustainability Indicators	Direct costs of maintenance for manufacturing	Direct Costs	Maintenance costs	TIER1B_SUNSHINE
Economic sustainability Indicators	Direct costs of installation (heating, lighting) for manufacturing	Direct Costs	Manufacturing costs	TIER1B_SUNSHINE
Economic sustainability Indicators	Direct costs of end-of-life	Direct Costs	Waste management costs	TIER1B_SUNSHINE
Economic sustainability Indicators	Economic benefits of by-product/co-product	Economic Benefits	Economic Benefits	TIER1B_SUNSHINE
Economic sustainability Indicators	Direct benefits of production	Economic Benefits	Economic Benefits	TIER1B_SUNSHINE
Economic sustainability Indicators	Direct benefits of product	Economic Benefits	Economic Benefits	TIER1B_SUNSHINE
Economic sustainability Indicators	Direct benefits of use of product	Economic Benefits	Economic Benefits	TIER1B_SUNSHINE
Environmental Sustainability Indicators	Emissions to water	Emissions	Emissions	TIER1B_SUNSHINE
Environmental Sustainability Indicators	Emissions to air	Emissions	Emissions	TIER1B_SUNSHINE
Environmental Sustainability Indicators	Emissions to water	Emissions	Emissions	TIER1B_SUNSHINE
Environmental Sustainability Indicators	Emissions to air	Emissions	Emissions	TIER1B_SUNSHINE
Environmental Sustainability Indicators	Emissions to water from product use	Emissions	Emissions	TIER1B_SUNSHINE
Environmental Sustainability Indicators	Emissions to air from product use	Emissions	Emissions	TIER1B_SUNSHINE
Social sustainability Indicators	End-of-life information	Product Lifecycle	Functionality	TIER1B_SUNSHINE
Environmental Sustainability Indicators	Energy consumption during production process	Energy Consumption	Energy Consumption	TIER1B_SUNSHINE
Environmental Sustainability Indicators	Energy consumption during manufacturing	Energy Consumption	Energy Consumption	TIER1B_SUNSHINE
Environmental Sustainability Indicators	Energy consumption from product use	Energy Consumption	Energy Consumption	TIER1B_SUNSHINE
Functionality Indicators	Durability	Product Quality	Functionality	TIER1B_SUNSHINE
Functionality Indicators	Performance	Product Quality	Functionality	TIER1B_SUNSHINE
Functionality Indicators		Regulatory Scope	Functionality	TIER1B_SUNSHINE
Functionality Indicators	Reliability	Product Quality	Functionality	TIER1B_SUNSHINE
Functionality Indicators	Useability	User Experience	Functionality	TIER1B_SUNSHINE
Functionality Indicators	Versatility	Product Adaptability	Functionality	TIER1B_SUNSHINE
Functionality Indicators	Customer needs	Customer Focus	Functionality	TIER1B_SUNSHINE
Functionality Indicators	Target customer	Customer Focus	Functionality	TIER1B_SUNSHINE
Functionality Indicators	Durability	Product Quality	Functionality	TIER1B_SUNSHINE
Functionality Indicators	Performance	Product Quality	Functionality	TIER1B_SUNSHINE
Functionality Indicators	Reliability	Product Quality	Functionality	TIER1B_SUNSHINE
Functionality Indicators	Useability	User Experience	Functionality	TIER1B_SUNSHINE
Functionality Indicators	Versatility	Product Adaptability	Functionality	TIER1B_SUNSHINE
Functionality Indicators	Customer needs	Customer Focus	Functionality	TIER1B_SUNSHINE
Functionality Indicators	Target customer	Customer Focus	Functionality	TIER1B_SUNSHINE
Functionality Indicators	Service issues	Customer Support	Functionality	TIER1B_SUNSHINE
Social sustainability Indicators	Local employment	Employment	Employment	TIER1B_SUNSHINE
Social sustainability Indicators	Local employment	Employment	Employment	TIER1B_SUNSHINE
Social sustainability Indicators	Material resources access	Resource Access	Impacts on local communities	TIER1B_SUNSHINE
Environmental Sustainability Indicators	Less waste, less use of plastic in product use	Waste Management	Packaging optimization	TIER1B_SUNSHINE
Environmental Sustainability Indicators	Increase the yield of your process	Process Optimization	Process Optimization	TIER1B_SUNSHINE
Functionality Indicators	Process scalability	Process Optimization	Process Optimization	TIER1B_SUNSHINE
Environmental Sustainability Indicators	Use of raw materials derived from renewable resources	Resource Efficiency	Renewable resources	TIER1B_SUNSHINE
Environmental Sustainability Indicators	Reduce the use of raw materials	Resource Efficiency	Resource Efficiency	TIER1B_SUNSHINE
Social sustainability Indicators	Traceability of raw materials	Other Business Indicators	Supply chain traceability	TIER1B_SUNSHINE
Social sustainability Indicators	Raw materials coming from underdeveloped, developing or third world countries	-	Supply chain traceability	TIER1B_SUNSHINE
Social sustainability Indicators	Assessment of suppliers	Supply Chain Management	Supply chain traceability	TIER1B_SUNSHINE
Social sustainability Indicators	Assessment of suppliers	Supply Chain Management	Supply chain traceability	TIER1B_SUNSHINE
Social sustainability Indicators	Raw materials coming from underdeveloped, developing or third world countries	-	Supply chain traceability	TIER1B_SUNSHINE
Environmental Sustainability Indicators	Use of bio-based materials	Resource Efficiency	Use of bio-based materials	TIER1B_SUNSHINE
Environmental Sustainability Indicators	Waste production during production process	Waste Management	Waste production and management	TIER1B_SUNSHINE
Environmental Sustainability Indicators	Recyclability of waste produced in production process		Waste production and management	TIER1B_SUNSHINE
Environmental Sustainability Indicators	Waste production during manufacturing	Waste Management	Waste production and management	TIER1B_SUNSHINE
Environmental Sustainability Indicators	Recyclability of waste produced in manufacturing	Circular Economy	Waste production and management	TIER1B_SUNSHINE
Environmental Sustainability Indicators	Waste production from product use	Waste Management	Waste production and management	TIER1B_SUNSHINE
Environmental Sustainability Indicators	Consumption of water resources in production process	Water Consumption	Water Consumption	TIER1B_SUNSHINE
Environmental Sustainability Indicators	Consumption of water resources in manufacturing	Water Consumption	Water Consumption	TIER1B_SUNSHINE
Environmental Sustainability Indicators	Consumption of water resources in product use	Water Consumption	Water Consumption	TIER1B_SUNSHINE
Social sustainability Indicators	Technological development, economic impact, education opportunities	-	Capacity building	TIER1B_SUNSHINE
Social sustainability Indicators	Presence of unions within the organization is adequately supported (availability of facilities to union, posting of union notices, time to exercise the representation functions on paid work hours)	-	Corporate Social Responsibility	UNEP_categories
Social sustainability Indicators	Check the availability of collective bargaining agreement and meeting minutes (e.g. copies of collective bargaining negotiations and agreements are kept on file)	Labour Rights	Corporate Social Responsibility	UNEP_categories
Social sustainability Indicators	Employee/union representatives are invited to contribute to planning of larger changes in the company, which will affect the working conditions	-	Corporate Social Responsibility	UNEP_categories
Social sustainability Indicators	Birth certificate, passport, identity card, work per-mit, or other original documents belonging to the worker are not retained or kept for safety reasons by the organization neither upon hiring nor during employment	Employment	Worker rights	UNEP_categories
Social sustainability Indicators	Workers are free to terminate their employment within the prevailing limits	Employment	Worker rights	UNEP_categories
Social sustainability Indicators	announcements of open positions happen through national/regional newspapers, public job data- bases on the internet, employment services, or other publicly available media ensuring a broad announcement.	Employment	Employment	UNEP_categories
Social sustainability Indicators	ownership of the farm/company	Ownership Rights	Company governace	UNEP_categories
Social sustainability Indicators	evidence of access to services (e.g., inputs such as fertilizer and seeds (planting material); affordable credit and capital; use of credit (in a given year); to agronomic assistance)	-	Impacts on local communities	UNEP_categories
Social sustainability Indicators	management oversight of structural integrity	Infrastructure Management	Infrastructure Management	UNEP_categories
Social sustainability Indicators	Strength of internal management system to protect consumer privacy, in general	-	Consumer Benefits	UNEP_categories
Social sustainability Indicators	Presence of mechanisms to follow-up the realization of promises	Accountability	Corporate Social Responsibility	UNEP_categories
Social sustainability Indicators	Presence of systems promoting human and financial resources	Resource Management	Corporate Social Responsibility	UNEP_categories
Social sustainability Indicators	evidence of crop yield (e.g., crop yield calculated by estimated production/ estimated cultivation area; crop revenue calculated from farmer estimated sales; net crop income)	-	Agricultural Productivity	UNEP_categories
Social sustainability Indicators	evidence of production per year	Agricultural Productivity	Agricultural Productivity	UNEP_categories
Social sustainability Indicators	Presence of regular check-ups and frequency of animals welfare conducted by specialists (veteri- naries, animal biologists, or others)	-	Animal Welfare	UNEP_categories
Social sustainability Indicators	complaints from consumers or civil society organi- zations representing animal welfare issues	Animal Welfare	Animal Welfare	UNEP_categories
Social sustainability Indicators	actions in response to complaints or serious unforeseen cases putting the lives or welfare of the animals at risk	Animal Welfare	Animal Welfare	UNEP_categories
Social sustainability Indicators	Presence of any label certifying the fair treatment of animals	Animal Welfare Certification	Animal Welfare	UNEP_categories
Social sustainability Indicators	improvements over time concerning the prevention of injuries, illnesses, and unforeseen fatal casualties	-	Animal Welfare	UNEP_categories
Social sustainability Indicators	improvements over time concerning the prevention of behavioral disorders and occupational diseases	Animal Welfare	Animal Welfare	UNEP_categories
Social sustainability Indicators	Quality, dimension and hygiene of livestock farming conditions; livestock density	-	Animal Welfare	UNEP_categories
Social sustainability Indicators	Percentage of working children under the legal age or 15 years old (14 years old for developing economies (%))	Child Labour	Child Labour	UNEP_categories
Social sustainability Indicators	Children are not performing work during the night (an example of unauthorized work by the ILO conventions C138 and C182)	Child Labour	Child Labour	UNEP_categories
Social sustainability Indicators	Working children younger than 15 and under the local compulsory age are attending school	Child Labour	Child Labour	UNEP_categories
Social sustainability Indicators	the organization carries out programs to promote leisure and family time for the children	Child Welfare Programs	Child Welfare	UNEP_categories
Social sustainability Indicators	the organization carries out programs to promote health impact to children	Child Health Programs	Child Welfare	UNEP_categories
Social sustainability Indicators	formalized commitment of the organization to improve the health of children	Child Health Commitment	Child Welfare	UNEP_categories
Social sustainability Indicators	the organization carries out programs that provide an understanding or information about the impact of products on children’s health, physical and psy- chological development	-	Consumer Health and Safety	UNEP_categories
Social sustainability Indicators	Presence/strength of community education initiatives	-	Stakeholders Engagement	UNEP_categories
Social sustainability Indicators	Presence of relevant organizational information to community members in their spoken language(s)	Community Communication	Stakeholders Engagement	UNEP_categories
Social sustainability Indicators	Presence of policy, leadership, and budget for early learning	-	Capacity building	UNEP_categories
Social sustainability Indicators	Presence of systems promoting community and student participation	Community Engagement	Capacity building	UNEP_categories
Social sustainability Indicators	organizational support (volunteer-hours or financial) for community initiatives	Community Support	Stakeholders Engagement	UNEP_categories
Social sustainability Indicators	Strength of organizational risk assessment with regard to potential for material resource conflict	Conflict Management	Conflict-Free Sourcing	UNEP_categories
Social sustainability Indicators	Presence of management measures to assess consumer health and safety	Consumer Health and Safety	Consumer Health and Safety	UNEP_categories
Social sustainability Indicators	Quality of labels of health and safety requirements	Consumer Health and Safety	Consumer Health and Safety	UNEP_categories
Social sustainability Indicators	number of legal complaints per year against the organization with regard to security concerns	Legal Compliance	Occupational safety	UNEP_categories
Social sustainability Indicators	contribution of the product/service/organization to economic progress (e.g., annual growth rate of real gDP per employed person)	-	Market dimension and Application Potential	UNEP_categories
Social sustainability Indicators	organization efforts to strengthen community health (e.g. through shared community access to organization health resources)	Health and Safety	Impacts on local communities	UNEP_categories
Social sustainability Indicators	Does the organization have a certified environmental management system	-	Corporate Social Responsibility	UNEP_categories
Social sustainability Indicators	Annual arrests connected to protests of organization actions	-	Conflicts Management	UNEP_categories
Social sustainability Indicators	Do policies related to intellectual property respect moral and economic rights of the community	Intellectual Property Rights	Impacts on local communities	UNEP_categories
Social sustainability Indicators	Percentage of suppliers the enterprise has audited with regard to social responsibility in the last year	Corporate Governance	Corporate Social Responsibility	UNEP_categories
Social sustainability Indicators	membership in an initiative that promotes social responsibility along the supply chain	Corporate Governance	Corporate Social Responsibility	UNEP_categories
Social sustainability Indicators	Support to suppliers in terms of consciousness- raising and counselling concerning the social responsibility issues	Corporate Governance	Corporate Social Responsibility	UNEP_categories
Social sustainability Indicators	Organization’s policy and practice	Corporate Governance	Corporate Social Responsibility	UNEP_categories
Social sustainability Indicators	Publication of a sustainability report	Sustainability Reporting	Corporate Social Responsibility	UNEP_categories
Social sustainability Indicators	Quality and comprehensiveness of the information available in the sustainability report or other documents regarding the social and environmental performance of the organization	Product Quality	Corporate Social Responsibility	UNEP_categories
Social sustainability Indicators	communication of the results of social and environmental life cycle impact assessment	Sustainability Reporting	Corporate Social Responsibility	UNEP_categories
Social sustainability Indicators	Certification/label the organization obtained for the product/site	Sustainability Certification	Corporate Social Responsibility	UNEP_categories
Social sustainability Indicators	company rating in sustainability indices (Dow Jones Sustainability index, ftSe4good, eSi, HSbc, corporate Sustainability index, etc.)	-	Corporate Social Responsibility	UNEP_categories
Social sustainability Indicators	Presence of publicly available documents as promises or agreements on sustainability issues	Sustainability Practices	Corporate Social Responsibility	UNEP_categories
Social sustainability Indicators	contingency planning measures, disaster, emer- gency management plan, training programs, and recovery/ restoration plans	-	Corporate Social Responsibility	UNEP_categories
Social sustainability Indicators	evidence of policies/management plan(s) in place to protect and/or support cultural heritage	Cultural Heritage Protection	Cultural Heritage Protection	UNEP_categories
Social sustainability Indicators	Presence of organizational program to include cultural heritage expression in product design/ production	Cultural Heritage Protection	Cultural Heritage Protection	UNEP_categories
Social sustainability Indicators	Presence of documented initiatives and activities oriented to support and promote cultural heritage (e.g., funding of cultural activities and events)	-	Cultural Heritage Protection	UNEP_categories
Social sustainability Indicators	Records on all workers stating names and ages or dates of birth are kept on file	Labour Force	Data management and Transparency	UNEP_categories
Social sustainability Indicators	Presence of strategies addressing demand-side gender-related and disability barriers to education	Education Access	Capacity building	UNEP_categories
Social sustainability Indicators	Presence of equitable access to education	Education Access	Capacity building	UNEP_categories
Social sustainability Indicators	Presence of education systems promoting accountability to communities	Education Accountability	Capacity building	UNEP_categories
Social sustainability Indicators	Employment is not conditioned by any restrictions on the right to collective bargaining	Employment	Worker rights	UNEP_categories
Social sustainability Indicators	Percentage of permanent workers receiving paid time-off	Labour Force	Worker rights	UNEP_categories
Social sustainability Indicators	Presence of a written contract which defines the relationship between the employers and workers (rights and responsibilities of each)	Labour Force	Worker rights	UNEP_categories
Social sustainability Indicators	level of education completed by house- hold/family members	-	Education Access	UNEP_categories
Social sustainability Indicators	age of farm/company manager or the per- son who generally makes the decisions	-	Worker rights	UNEP_categories
Social sustainability Indicators	age of household/family members concerning for example age of member doing primary work in target commodity or agribusiness chain; attending training around the target; receiving the money from the sale; receiving credit around the target, joining the farmer group/cooperative	-	Worker rights	UNEP_categories
Social sustainability Indicators	Proportion of informal employment in non-agricul- ture employment, by sex	Employment	Work Fairness	UNEP_categories
Social sustainability Indicators	Do internal management systems ensure that clear information is provided to consumers on end-of- life options (if applicable)?	-	End-of-life information	UNEP_categories
Social sustainability Indicators	legal actions pending or completed during the reporting period regarding anti-competitive behavior and violations of anti-trust and monopoly legislation in which the reporting organization has been identified as a participant (GRI SO7)	Other Business Indicators	Corporate Social Responsibility	UNEP_categories
Social sustainability Indicators	membership in alliances that behave in an anti- competitive way	-	Corporate Social Responsibility	UNEP_categories
Social sustainability Indicators	Documented statement or procedures (policy, strategy etc.) to prevent engaging in or being complicit in anti-competitive behavior	Other Business Indicators	Corporate Social Responsibility	UNEP_categories
Social sustainability Indicators	absence of coercive communication with suppliers	Ethical Practices	Corporate Social Responsibility	UNEP_categories
Social sustainability Indicators	the organization has pledged to comply with the global compact principles and has engaged itself to present yearly; communication on progress	Ethical Practices	Corporate Social Responsibility	UNEP_categories
Social sustainability Indicators	implementation/signing of principles or other codes of conduct (Sullivan Principles, caux round table, un principles, etc.)	-	Corporate Social Responsibility	UNEP_categories
Social sustainability Indicators	Organization’s role in the development of conflicts	Conflict Management	Corporate Social Responsibility	UNEP_categories
Social sustainability Indicators	Disputed products	Ethical Practices	Corporate Social Responsibility	UNEP_categories
Social sustainability Indicators	formalized commitment of the organization to pre- vent corruption, referring to recognized standards	-	Corporate Social Responsibility	UNEP_categories
Social sustainability Indicators	the organization carries out an anti-corruption program	Ethical Practices	Corporate Social Responsibility	UNEP_categories
Social sustainability Indicators	the organization installs or co-operates with inter- nal and external controls to prevent corruption	Anti-Corruption	Corporate Social Responsibility	UNEP_categories
Social sustainability Indicators	Written documents on active involvement of the organization in corruption and bribery; convictions related to corruption and bribery	Anti-Corruption	Corporate Social Responsibility	UNEP_categories
Social sustainability Indicators	the organization has a policy on responsible marketing	Responsible Marketing	Corporate Social Responsibility	UNEP_categories
Social sustainability Indicators	the organization performs audit on the implementation of responsible marketing	-	Corporate Social Responsibility	UNEP_categories
Social sustainability Indicators	the organization receives monitoring and evaluation from the governing body on the implementa- tion of responsible marketing	-	Corporate Social Responsibility	UNEP_categories
Social sustainability Indicators	number of consumer complaints	Consumer Satisfaction	Functionality	UNEP_categories
Social sustainability Indicators	number of defects detected per production batch	Product Quality	Functionality	UNEP_categories
Social sustainability Indicators	Presence of a mechanism for customers to provide feedback	Customer Feedback	Functionality	UNEP_categories
Social sustainability Indicators	management measures to improve feedback mechanisms	Customer Feedback	Functionality	UNEP_categories
Social sustainability Indicators	GRI PR5. Practices related to customer satisfaction, including results of surveys measuring customer satisfaction	-	Functionality	UNEP_categories
Social sustainability Indicators	number of consumer complaints related to breach of privacy or loss of data within the last year	Consumer Satisfaction	Functionality	UNEP_categories
Social sustainability Indicators	number of complaints by regulatory bodies related to breach of consumer privacy or loss of data within the last year	Consumer Privacy	Functionality	UNEP_categories
Social sustainability Indicators	management effort to minimize use of hazardous substances	Hazardous Substances Management	Hazardous substances or materials	UNEP_categories
Social sustainability Indicators	Strength of policies in place to protect the rights of indigenous community members	Indigenous Rights	Indigenous Rights	UNEP_categories
Social sustainability Indicators	annual meetings held with indigenous community members	Indigenous Rights	Indigenous Rights	UNEP_categories
Social sustainability Indicators	the organization committed to accepting indigenous land rights	Indigenous Rights	Indigenous Rights	UNEP_categories
Social sustainability Indicators	response to charges of discrimination against indigenous community members	Indigenous Rights	Indigenous Rights	UNEP_categories
Social sustainability Indicators	Partnerships in research and development	Research and Development	Innovation and R&D	UNEP_categories
Social sustainability Indicators	investments in technology development/ technology transfer	-	Innovation and R&D	UNEP_categories
Social sustainability Indicators	Number of hours effectively worked by employees (at each level of employment)	Employment	Worker Rights	UNEP_categories
Social sustainability Indicators	Number of holidays effectively used by employees (at each level of employment)	Employment	Worker Rights	UNEP_categories
Social sustainability Indicators	Workers voluntarily agree upon employment terms. Employment contracts stipulate wage, working time, holidays, and terms of resignation. Employ-ment contracts are comprehensible to the workers and are kept on file	Employment	Worker Rights	UNEP_categories
Social sustainability Indicators	Workers are not bonded by debts exceeding legal limits to the employer	Labour Force	Worker Rights	UNEP_categories
Social sustainability Indicators	List and provide short description of social benefits provided to the workers (e.g., health insurance, pension fund, child care, education, accommoda- tion, etc.)	Labour Force	Worker Rights	UNEP_categories
Social sustainability Indicators	Presence of contracts’ essential elements	Worker Rights	Worker Rights	UNEP_categories
Social sustainability Indicators	Workers have a copy of the signed contract	Labour Force	Worker Rights	UNEP_categories
Social sustainability Indicators	Percentage of workforce hired locally	Local Employment	Employment	UNEP_categories
Social sustainability Indicators	Strength of policies on local hiring preferences	Local Employment	Employment	UNEP_categories
Social sustainability Indicators	Percentage of spending on locally-based suppliers	Local Procurement	Employment	UNEP_categories
Social sustainability Indicators	Days and months without sufficient food in past year	Food Security	Impacts on local communities	UNEP_categories
Social sustainability Indicators	access to domestic services (e.g., water for domestic use; electricity)	-	Impacts on local communities	UNEP_categories
Social sustainability Indicators	Strength of organizational procedures for integra- ting migrant workers into the community	Labour Force	Migrant Integration	UNEP_categories
Social sustainability Indicators	Number/percentage of injuries or fatal accidents in the organization by job qualification inside the company	Health and Safety	Occupational safety	UNEP_categories
Social sustainability Indicators	Hours of injuries per level of employees	Health and Safety	Occupational safety	UNEP_categories
Social sustainability Indicators	Presence of a formal policy concerning health and safety	Health and Safety	Occupational safety	UNEP_categories
Social sustainability Indicators	adequate general occupational safety measures	Health and Safety	Occupational safety	UNEP_categories
Social sustainability Indicators	Preventive measures and emergency protocols exist regarding accidents and injuries	Health and Safety	Occupational safety	UNEP_categories
Social sustainability Indicators	Preventive measures and emergency protocols exist regarding pesticide and chemical exposure	Health and Safety	Occupational safety	UNEP_categories
Social sustainability Indicators	appropriate protective gear required in all appli- cable situations	Health and Safety	Occupational safety	UNEP_categories
Social sustainability Indicators	number of (serious/non-serious) occupational Safety and Health administration (oSHa) viola- tions reported within the past 3 years and status of violations	Health and Safety	Occupational safety	UNEP_categories
Social sustainability Indicators	number of casualties and injuries per year ascribed to the organization	Workplace Safety	Occupational safety	UNEP_categories
Social sustainability Indicators	Number of employees earning wages below poverty line	Poverty Alleviation	Poverty Alleviation	UNEP_categories
Social sustainability Indicators	the organization carries out a poverty alleviation program	Poverty Alleviation	Poverty Alleviation	UNEP_categories
Social sustainability Indicators	formalized commitment of the organization to reduce poverty	Poverty Alleviation	Poverty Alleviation	UNEP_categories
Social sustainability Indicators	Presence of a Quality and/or Product Safety management System such as iSo 9001:2015, british retail consortium (brc), Halal, international food Standard (ifS), iSo 10377:2013, etc.	-	Chemical/material within the scope of availalbe legislations	UNEP_categories
Social sustainability Indicators	annual incidents of non-compliance with regulatory labeling requirements	Regulatory Compliance	Chemical/material within the scope of availalbe legislations	UNEP_categories
Social sustainability Indicators	the number of incidents of non-compliances with regulations and/or voluntary codes concerning product and service information/ marketing/ advertising and labeling, by incidents of non- compliance with regulations resulting in a fine	-	Chemical/material within the scope of availalbe legislations	UNEP_categories
Social sustainability Indicators	or penalty; incidents of non-compliance with regulations resulting in a warning; and incidents of non-compliance with voluntary codes	Regulatory Compliance	Chemical/material within the scope of availalbe legislations	UNEP_categories
Social sustainability Indicators	number of individuals who resettle (voluntarily and involuntarily) that can be attributed to the organization	Resettlement Impact	Chemical/material within the scope of availalbe legislations	UNEP_categories
Social sustainability Indicators	Strength of organizational policies related to resettlement (e.g. due diligence and procedural safeguards)	Corporate Governance	Chemical/material within the scope of availalbe legislations	UNEP_categories
Social sustainability Indicators	management policies related to private security personnel	Security Management	Workplace Conditions	UNEP_categories
Social sustainability Indicators	Number of sexual harassment incidents reported on a grievance helpline	Workplace Conditions	Sexual harassment	UNEP_categories
Social sustainability Indicators	Existence of clear responsibilities for matters of sexual harassment within the organization	Workplace Conditions	Sexual harassment	UNEP_categories
Social sustainability Indicators	Efforts by the organization to reduce the risk of sexual harassment	Workplace Conditions	Sexual harassment	UNEP_categories
Social sustainability Indicators	Participation in farmers organization	Community Engagement	Stakeholders Engagement	UNEP_categories
Social sustainability Indicators	membership in or access to a farmer organization	Community Engagement	Stakeholders Engagement	UNEP_categories
Social sustainability Indicators	Strength of written policies on community engagement at organization level	Community Engagement	Stakeholders Engagement	UNEP_categories
Social sustainability Indicators	Diversity of community stakeholder groups that engage with the organization	Community Engagement	Stakeholders Engagement	UNEP_categories
Social sustainability Indicators	number and quality of meetings with community stakeholders	Community Engagement	Stakeholders Engagement	UNEP_categories
Social sustainability Indicators	use of local intellectual property	Intellectual Property Rights	Stakeholders Engagement	UNEP_categories
Social sustainability Indicators	Complaints issued related to the non-fulfilment of promises or agreements by the organization by the local community or other stakeholders at oecD contact points or global reporting initiative	Stakeholder Grievances	Stakeholders Engagement	UNEP_categories
Social sustainability Indicators	community involvement programs and opportuni- ties as a consistent goal for schools	Community Engagement	Stakeholders Engagement	UNEP_categories
Social sustainability Indicators	Presence of provisions of local community involvement in monitoring of school activities	-	Stakeholders Engagement	UNEP_categories
Social sustainability Indicators	evidence of quality of relationship with primary buyer (e.g., length of relationship; number of options for buyers; presence of benefits from trade; percent of harvest sold; knowledge of certifications held)	-	Supply chain traceability	UNEP_categories
Social sustainability Indicators	traceability and understanding of quality standards & price premiums (if they exist)	Other Business Indicators	Supply chain traceability	UNEP_categories
Social sustainability Indicators	Presence of explicit code of conduct that protect human rights of workers among suppliers	Labour Force	Supply chain traceability	UNEP_categories
Social sustainability Indicators	Sufficient lead time	Supply Chain Management	Supply chain traceability	UNEP_categories
Social sustainability Indicators	reasonable volume fluctuations	Supply Chain Management	Supply chain traceability	UNEP_categories
Social sustainability Indicators	Presence of contractual instruments within the supply /value chain that ensure the distribution of the value among the actors	Supply Chain Management	Supply chain traceability	UNEP_categories
Social sustainability Indicators	Presence of interbranch / professional organizations that represent the interest of segment of the value chains	-	Supply chain traceability	UNEP_categories
Social sustainability Indicators	number of reported and/or documented illegal activities	Legal Compliance	Data management and Transparency	UNEP_categories
Social sustainability Indicators	non-compliance with regulations regarding transparency	Transparency	Data management and Transparency	UNEP_categories
Social sustainability Indicators	consumer complaints regarding transparency	Transparency	Data management and Transparency	UNEP_categories
Social sustainability Indicators	Evidence of violations of obligations to workers under labor or social security laws and employment regulations	Employment	Violation of regulations	UNEP_categories
Social sustainability Indicators	Lowest paid worker, compared to the minimum wage and/or living wage	-	Wages and Salaries	UNEP_categories
Social sustainability Indicators	Presence of suspicious deductions on wages	Wages and Salaries	Wages and Salaries	UNEP_categories
Social sustainability Indicators	Presence of formal policies on equal opportunities	Social Equity	Work Fairness	UNEP_categories
Social sustainability Indicators	total numbers of incidents of discrimination and actions taken	Social Equity	Work Fairness	UNEP_categories
Social sustainability Indicators	composition of governance bodies and breakdown of employees per category according to gender, age group, minority, group membership, and other indicators of diversity	Group	Work Fairness	UNEP_categories
Social sustainability Indicators	ratio of basic salary of men to women by em- ployee category	Gender Equity	Work Fairness	UNEP_categories
Social sustainability Indicators	integration of ethical, social, environmental, and regarding gender equality criterions in purchasing policy, distribution policy, and contract signatures	Social Equity	Work Fairness	UNEP_categories
Social sustainability Indicators	average hourly earnings of female and male employees, by occupation, age, and persons with disabilities	-	Work Fairness	UNEP_categories
Social sustainability Indicators	Workers have access to a neutral, binding, and independent dispute resolution procedure	Labour Force	Work Fairness	UNEP_categories
Social sustainability Indicators	Regular and documented payment of workers (weekly, bi-weekly)	Labour Force	Workplace Conditions	UNEP_categories
Social sustainability Indicators	Respect of contractual agreements concerning overtime	Workplace Conditions	Workplace Conditions	UNEP_categories
Social sustainability Indicators	The organization provides flexibility	Workplace Conditions	Workplace Conditions	UNEP_categories
Social sustainability Indicators	Presence/number of serious injuries, illnesses, and unforeseen fatal casualties reported by workers and animal specialists	Labour Force	Occupational safety	UNEP_categories
Social sustainability Indicators	Presence/number of behavioral disorders or occupational diseases reported by workers, animal specialists, and/or civil society members	Labour Force	Occupational safety	UNEP_categories
Social sustainability Indicators	Has the organization developed project-related infrastructure with mutual community access and benefit	Community Development	Capacity building	UNEP_categories
Social sustainability Indicators	Definition of a fair price, i.e., a price that covers all the production costs and returns an acceptable profit margin; this indicator can be either qualita- tive and quantitative, the latter calculated through a detailed cost assessment	Group	Work Fairness	UNEP_categories
Social sustainability Indicators	involvement in technology transfer program or projects	Technology Transfer	Innovation and R&D	UNEP_categories
Environmental Sustainability Indicators	Comparative Toxic Unit for humans (CTUh)		Human Toxicity	JRC-SSbD framework
Environmental Sustainability Indicators	Comparative Toxic Unit for humans (CTUh)		Human Toxicity	JRC-SSbD framework
Environmental Sustainability Indicators	Comparative Toxic Unit for ecosystems (CTUe)		Human Toxicity	JRC-SSbD framework
Environmental Sustainability Indicators	Global warming potentia (GWP100)		Climate change	JRC-SSbD framework
Environmental Sustainability Indicators	Ozone Depletion Potential (ODP)		Ozone depletion	JRC-SSbD framework
Environmental Sustainability Indicators	Human health effects associatedwith exposure to PM2.5		Air Quality	JRC-SSbD framework
Environmental Sustainability Indicators	Human exposure to U		Ozone depletion	JRC-SSbD framework
Environmental Sustainability Indicators	Tropospheric ozone concentration increase:		Air Quality	JRC-SSbD framework
Environmental Sustainability Indicators	Accumulated Exceedance (AE):		Water acidification	JRC-SSbD framework
Environmental Sustainability Indicators	Accumulated Exceedance (AE):		Eutrophication	JRC-SSbD framework
Environmental Sustainability Indicators	Fraction of nutrients reaching freshwater end compartment (P):		Eutrophication	JRC-SSbD framework
Environmental Sustainability Indicators	Fraction of nutrients reaching marine end compartment (N):		Eutrophication	JRC-SSbD framework
Environmental Sustainability Indicators	Soil quality index aggregating: Biotic production, Erosion resistance, Mechanical filtration, and Groundwater replenishment		Soil Quality	JRC-SSbD framework
Environmental Sustainability Indicators	User deprivation potential (deprivation weighted water consumption)		Water Consumption	JRC-SSbD framework
Environmental Sustainability Indicators	Abiotic resource depletion (ADP ultimate reserves)		Resource Efficiency	JRC-SSbD framework
Environmental Sustainability Indicators	Abiotic resource depletion – fossil fuels (ADP-fossil)		Resource Efficiency	JRC-SSbD framework
Social sustainability Indicators	Fair Salary		Wages and Salaries	JRC-SSbD framework
Social sustainability Indicators	Forced Lbour		Forced Labour	JRC-SSbD framework
Social sustainability Indicators	Health and Safety		Occupational safety	JRC-SSbD framework
Social sustainability Indicators	Child labour		Child Labour	JRC-SSbD framework
Social sustainability Indicators	Freedom of association and collective bargain		Worker Rights	JRC-SSbD framework
Social sustainability Indicators	Working hours		Worker Rights	JRC-SSbD framework
Social sustainability Indicators	Equal opportunities / discrimination		Work Fairness	JRC-SSbD framework
Social sustainability Indicators	Skills, knowledge and employability		Employment	JRC-SSbD framework
Social sustainability Indicators	Social benefits / social security		Social improvement	JRC-SSbD framework
Social sustainability Indicators	Smallholders including farmers		Stakeholders Engagement	JRC-SSbD framework
Social sustainability Indicators	Management of reorganization		Stakeholders Engagement	JRC-SSbD framework
Social sustainability Indicators	Employment relationships		Employment	JRC-SSbD framework
Social sustainability Indicators	Human rights due diligence		Corporate Social Responsibility	JRC-SSbD framework
Social sustainability Indicators	Sexual harassment		Sexual harassment	JRC-SSbD framework
Social sustainability Indicators	Working conditions		Workplace Conditions	JRC-SSbD framework
Social sustainability Indicators	Job satisfaction		Workplace Conditions	JRC-SSbD framework
Social sustainability Indicators	Management of workers individual health		Occupational safety	JRC-SSbD framework
Social sustainability Indicators	Noise reduction		Workplace Conditions	JRC-SSbD framework
Social sustainability Indicators	Measures to attract women into the workforce or to break down gender segregation in jobs		Corporate Social Responsibility	JRC-SSbD framework
Social sustainability Indicators	Pay gap between executives and the average worker not excessive		Work Fairness	JRC-SSbD framework
Social sustainability Indicators	Implementation of ILO conventions		Worker Rights	JRC-SSbD framework
Social sustainability Indicators	Fair competition		Conflicts Management	JRC-SSbD framework
Social sustainability Indicators	Promoting social responsibility		Corporate Social Responsibility	JRC-SSbD framework
Social sustainability Indicators	Respect of intellectual property rights		Worker Rights	JRC-SSbD framework
Social sustainability Indicators	Supplier relationship		Supply chain traceability	JRC-SSbD framework
Social sustainability Indicators	Whealth distribution		Wages and Salaries	JRC-SSbD framework
Social sustainability Indicators	Corruption		Corporate Social Responsibility	JRC-SSbD framework
Social sustainability Indicators	Prevention and mitigation of armed conflicts		Conflict-Free Sourcing	JRC-SSbD framework
Social sustainability Indicators	Technology Development		Innovation and R&D	JRC-SSbD framework
Social sustainability Indicators	Public commitments to sustainability issues		Social improvement	JRC-SSbD framework
Social sustainability Indicators	Contribution to economic development		Social improvement	JRC-SSbD framework
Social sustainability Indicators	Ethical treatment of animals		Animal Welfare	JRC-SSbD framework
Social sustainability Indicators	Poverty alleviation		Poverty Alleviation	JRC-SSbD framework
Social sustainability Indicators	Taxation		Social improvement	JRC-SSbD framework
Social sustainability Indicators	Meeting basisc needs		Functionality	JRC-SSbD framework
Social sustainability Indicators	Access to services and inputs		Stakeholders Engagement	JRC-SSbD framework
Social sustainability Indicators	Women's empowerment		Work Fairness	JRC-SSbD framework
Social sustainability Indicators	Child labour		Child Labour	JRC-SSbD framework
Social sustainability Indicators	Health and Safety		Consumer Health and Safety	JRC-SSbD framework
Social sustainability Indicators	Land rights		Stakeholders Engagement	JRC-SSbD framework
Social sustainability Indicators	Trading relationship		Supply chain traceability	JRC-SSbD framework
Social sustainability Indicators	Community engagement		Stakeholders Engagement	JRC-SSbD framework
Social sustainability Indicators	Local employment		Employment	JRC-SSbD framework
Social sustainability Indicators	Safe and healthy living conditions		Impacts on local communities	JRC-SSbD framework
Social sustainability Indicators	Access to material resources (water, minerals, land, biological resources)		Impacts on local communities	JRC-SSbD framework
Social sustainability Indicators	Respect of indigenous rights		Indigenous Rights	JRC-SSbD framework
Social sustainability Indicators	Access to immaterial resources (e.g., community services, intellectual property rights, freedom of expression, and access to information)		Impacts on local communities	JRC-SSbD framework
Social sustainability Indicators	Promotion of skills and knowledge		Innovation and R&D	JRC-SSbD framework
Social sustainability Indicators	Secure living conditions		Impacts on local communities	JRC-SSbD framework
Social sustainability Indicators	Inclusion of people with disabilities		Support to vulnerable people	JRC-SSbD framework
Social sustainability Indicators	Nuisance reduction		Impacts on local communities	JRC-SSbD framework
Social sustainability Indicators	Creating and preserving decent jobs		Employment	JRC-SSbD framework
Social sustainability Indicators	Delocalization and migration		Impacts on local communities	JRC-SSbD framework
Social sustainability Indicators	Cultural heritage		Cultural Heritage Protection	JRC-SSbD framework
Social sustainability Indicators	Access to basic needs for sustainable development		Impacts on local communities	JRC-SSbD framework
Social sustainability Indicators	Contribution to economic development		Social improvement	JRC-SSbD framework
Social sustainability Indicators	Access to infrastructure		Impacts on local communities	JRC-SSbD framework
Social sustainability Indicators	Child care		Child Welfare	JRC-SSbD framework
Social sustainability Indicators	Promoting community-driven development		Stakeholders Engagement	JRC-SSbD framework
Social sustainability Indicators	Promoting gender equality		Work Fairness	JRC-SSbD framework
Social sustainability Indicators	Avoiding and addressing negative impacts on communities affected by business operations		Impacts on local communities	JRC-SSbD framework
Social sustainability Indicators	Health and Safety		Occupational safety	JRC-SSbD framework
Social sustainability Indicators	Responsible communication		Data management and Transparency	JRC-SSbD framework
Social sustainability Indicators	Consumer privacy		Consumer Benefits	JRC-SSbD framework
Social sustainability Indicators	Transparency		Data management and Transparency	JRC-SSbD framework
Social sustainability Indicators	Promotion of skills and knowledge		Stakeholders Engagement	JRC-SSbD framework
Social sustainability Indicators	Consumer product experience		Consumer Benefits	JRC-SSbD framework
Social sustainability Indicators	Accessibility		Consumer Benefits	JRC-SSbD framework
Social sustainability Indicators	Feedback mechanism		Consumer Benefits	JRC-SSbD framework
Social sustainability Indicators	Direct impact on basic needs (healthcare, clean water, healthy food, shelter, education)		Consumer Benefits	JRC-SSbD framework
Social sustainability Indicators	Impact on vulnerable consumers		Support to vulnerable people	JRC-SSbD framework
Social sustainability Indicators	End-of-life responsibility		End-of-life information	JRC-SSbD framework
Social sustainability Indicators	Affordability		Use costs	JRC-SSbD framework
Social sustainability Indicators	Effectiveness and comfort		Functionality	JRC-SSbD framework
Social sustainability Indicators	Designing products to be durable and repairable		Functionality	JRC-SSbD framework
Social sustainability Indicators	Ensuring access to quality healthcare		Healthcare Access	JRC-SSbD framework
Social sustainability Indicators	Improving access to healthy and highly nutritious food		Child Welfare	JRC-SSbD framework
Social sustainability Indicators	Improving access to goodquality drinking water		Child Welfare	JRC-SSbD framework
Social sustainability Indicators	Improving access to goodquality housing		Housing Quality	JRC-SSbD framework
Social sustainability Indicators	Improving access to education and lifelong learning		Education Access	JRC-SSbD framework
Social sustainability Indicators	Education provided in local community		Education Access	JRC-SSbD framework
Social sustainability Indicators	Health issues for children		Child Welfare	JRC-SSbD framework
Social sustainability Indicators	Children concerns regarding marketing practices		Child Welfare	JRC-SSbD framework
Environmental Sustainability Indicators	Impacts on the environment		Environment resilience and vulnerability	Australian_impact_analysis
Environmental Sustainability Indicators	Changes that may reduce or increase pollution and/or carbon emissions		Emissions	Australian_impact_analysis
Environmental Sustainability Indicators	Increasing or limiting economic development affecting threatened species or World Heritage sites		Animal Welfare	Australian_impact_analysis
Social sustainability Indicators	Impacts on Indigenous Australians		Indigenous Rights	Australian_impact_analysis
Social sustainability Indicators	Measures to close the gap between Indigenous and non-Indigenous Australians		Social improvement	Australian_impact_analysis
Social sustainability Indicators	Changes to criminal and civil laws, such as:		Criminality	Australian_impact_analysis
Social sustainability Indicators	Creation of new criminal or civil offences		Criminality	Australian_impact_analysis
Social sustainability Indicators	Amending elements of existing offences		Criminality	Australian_impact_analysis
Social sustainability Indicators	Changing the applicability of criminal or civil offenses		Criminality	Australian_impact_analysis
Social sustainability Indicators	Impacts on community organisations		Impacts on local communities	Australian_impact_analysis
Social sustainability Indicators	Changes to a grants process		Innovation and R&D	Australian_impact_analysis																																											Changes to a grants process	Changes to a grants process	Changes to a grants process
Social sustainability Indicators	Changing requirements for community organisations to keep records or provide documents		Data management and Transparency	Australian_impact_analysis
Social sustainability Indicators	Increasing or decreasing the income or social welfare payment an individual receives		Wages and Salaries	Australian_impact_analysis
Social sustainability Indicators	Changing access to goods and services		Social improvement	Australian_impact_analysis
Social sustainability Indicators	Banning products or services with adverse health outcomes		Consumer Health and Safety	Australian_impact_analysis
Social sustainability Indicators	Improving or limiting people’s access to health services or products		Healthcare Access	Australian_impact_analysis
Social sustainability Indicators	changing the information available to consumers		Data management and Transparency	Australian_impact_analysis
Social sustainability Indicators	Improving or limiting employment opportunities		Employment	Australian_impact_analysis
Social sustainability Indicators	Changing licencing or training requirements for employees in particular industries		Labour Impact	Australian_impact_analysis
Social sustainability Indicators	Incentivising healthy lifestyle changes		Social improvement	Australian_impact_analysis
Economic sustainability Indicators	impacts on the ability of businesses to compete in the market or on their incentives to compete		Market dimension and Application Potential	Australian_impact_analysis
Economic sustainability Indicators	creating a self-regulatory or co-regulatory regime		Market dimension and Application Potential	Australian_impact_analysis
Economic sustainability Indicators	changing the requirements for a licence, permit or other authorisation		Market dimension and Application Potential	Australian_impact_analysis
Economic sustainability Indicators	influencing the price or quantity of goods that are sold		Economic Benefits	Australian_impact_analysis
Economic sustainability Indicators	setting standards for product or service quality		Consumer Benefits	Australian_impact_analysis
Economic sustainability Indicators	changing the prices or types of inputs available to businesses		Other costs	Australian_impact_analysis
Economic sustainability Indicators	creating subsidies or cross-subsidies for businesses and/or industries		Economic Benefits	Australian_impact_analysis
Economic sustainability Indicators	changes to the number or type of products that businesses can offer		Process Optimization	Australian_impact_analysis
Economic sustainability Indicators	banning products or industry practices		Market dimension and Application Potential	Australian_impact_analysis
Economic sustainability Indicators	changing the way products can be offered		Market dimension and Application Potential	Australian_impact_analysis
Economic sustainability Indicators	impacts on consumer demand for certain products, such as:		Consumer Benefits	Australian_impact_analysis
Economic sustainability Indicators	compliance costs		Other costs	Australian_impact_analysis
Economic sustainability Indicators	administrative costs		Other costs	Australian_impact_analysis
Economic sustainability Indicators	substantive compliance costs		Other costs	Australian_impact_analysis
Economic sustainability Indicators	delay costs		Other costs	Australian_impact_analysis
[truncated: 5,000 more columns]

## Sheet: tabA3
		Inappropriate categorisation	Indicator	AI indicators' category	Final indicators' category	Tool
		example of wrong understanding	wastewater	Water Pollution	Waste production and management	Screening MCDA NANORIGO
			Does the manufacturing process lead to emissions of ozone depleting gases?	Emissions	Ozone depletion	AdMaCat
			ozone depletion potential (ODP)	Climate Change	Ozone depletion	ISA_chemicals
			Direct costs of end-of-life	Direct Costs	Waste management costs	TIER1B_SUNSHINE
			waste disposal	Direct Costs	Waste production and management	SAFA_FAO
			Critical materials	Resource Efficiency	Critical materials	TIER1B_SUNSHINE
			Use of raw materials derived from renewable resources	Resource Efficiency	Renewable resources	TIER1B_SUNSHINE
			eutrophication potential (EP)	Water Pollution	Eutrophication	ISA_chemicals
			Total turnover and employment for affected companies/industries	Revenue and Profitability	Employment	ECHA_SEA
			Landscape/aesthetic quality of environment	Other Environmental Impacts	Land Consumption	ECHA_SEA
			Presence of a written contract which defines the relationship between the employers and workers (rights and responsibilities of each)	Labour Force	Worker rights	UNEP_categories
			Change in inspection and monitoring costs (e.g. of imports, of emissions, etc.)	Emissions	Other costs	ECHA_SEA
			Cost difference in case of relocation of production (costs of establishing production facilities, cost of raw materials, transport costs etc)	Geographical Impact	Capital costs	ECHA_SEA
		example of too specific indicators'categories grouped by the research team into a broader one	organization efforts to strengthen community health (e.g. through shared community access to organization health resources)	Health and Safety	Impacts on local communities	UNEP_categories
			Do policies related to intellectual property respect moral and economic rights of the community	Intellectual Property Rights	Impacts on local communities	UNEP_categories
			Days and months without sufficient food in past year	Food Security	Impacts on local communities	UNEP_categories
		example of a too generic indictaors' caegory refined into more specific ones	Direct costs of end-of-life	Direct Costs	Waste management costs	TIER1B_SUNSHINE
			Direct costs of installation (heating, lighting) for manufacturing	Direct Costs	Manufacturing costs	TIER1B_SUNSHINE

## Sheet: check
Tool dell'excel vecchio (colonne copiate dal foglio stats vecchio)	WASP	NGRA	AdMa_overview	AdMaCat	agent_network	Early4AdMa	ECHA_SEA	GRI_standards	ISA_chemicals	ivl	SUNRISE_WP3	LicaraNanoSCAN	NANORIGO_MCDA	SAFA_FAO	Safety_Sustainability_screening	SLCA	SMM	socio_economic_SSbD	TIER1B_SUNSHINE	UNEP_categories	SSbD
Tool di questo excel (funzione unique qui valori "Tool" del foglio appendix1)	WASP	NGRA framework	AdMa_overview	AdMaCat	Agent_network	Early4AdMa	ECHA_SEA	GRI_standards	ISA_chemicals	ivl_LCBROM	SUNRISE_WP3	LicaraNanoSCAN	Screening MCDA NANORIGO	SAFA_FAO	SLCA_exploration	SMM	Socio_economic_SSbD	TIER1B_SUNSHINE	UNEP_categories	JRC-SSbD framework	Australian_impact_analysis
	uguali	diversi	uguali	uguali	uguali	uguali	uguali	uguali	uguali	diversi	uguali	uguali	diversi	uguali	diversi	diversi	diversi	diversi	diversi	diversi	diversi

## Sheet: dimensions stats
Revised common name	Total Occurrences	Environmental Sustainability Indicators	Social sustainability Indicators	Economic sustainability Indicators	Functionality Indicators	Regulatory Indicators	Safety Indicators	Good Governance Indicators	Total (sum of steps)	n° of Steps that consider the indicator
Contribution to SDGs	4	1	2	1	0	0	0	0	4	3
Energy Consumption	20	20	0	0	0	0	0	0	20	1
Resource Efficiency	15	15	0	0	0	0	0	0	15	1
Climate Change	13	13	0	0	0	0	0	0	13	1
Emissions	42	42	0	0	0	0	0	0	42	1
Functionality	57	9	25	7	16	0	0	0	57	4
Environment resilience and vulnerability	3	3	0	0	0	0	0	0	3	1
Innovation and R&D	22	1	11	10	0	0	0	0	22	3
Market dimension and Application Potential	27	1	4	22	0	0	0	0	27	3
Revenues	11	0	0	11	0	0	0	0	11	1
Economic Benefits	8	0	0	8	0	0	0	0	8	1
Social improvement	14	1	13	0	0	0	0	0	14	2
Occupational safety	19	0	19	0	0	0	0	0	19	1
Consumer Health and Safety	8	0	8	0	0	0	0	0	8	1
Healthcare Access	6	0	6	0	0	0	0	0	6	1
Employment	34	0	31	3	0	0	0	0	34	2
Persistent, bioaccumulative and toxic	7	7	0	0	0	0	0	0	7	1
Circular Economy	33	31	0	2	0	0	0	0	33	2
Critical materials	8	8	0	0	0	0	0	0	8	1
Eco-Toxicity	13	13	0	0	0	0	0	0	13	1
Hazardous substances or materials	8	7	1	0	0	0	0	0	8	2
Data management and Transparency	15	0	13	1	0	1	0	0	15	3
Environmental exposure, fate, stability and transformation	11	11	0	0	0	0	0	0	11	1
Chemical/material within the scope of availalbe legislations	25	1	6	0	0	18	0	0	25	3
Recognised techniques for characterisation and exposure estimation	3	0	0	0	0	3	0	0	3	1
Waste production and management	37	36	1	0	0	0	0	0	37	2
Land Consumption	6	6	0	0	0	0	0	0	6	1
Ozone depletion	6	6	0	0	0	0	0	0	6	1
Water Consumption	19	18	1	0	0	0	0	0	19	2
Conflicts Management	5	0	4	0	0	0	0	1	5	2
Consumer Benefits	15	0	13	2	0	0	0	0	15	2
Process Optimization	6	3	0	2	1	0	0	0	6	3
Use costs	18	0	2	16	0	0	0	0	18	2
Manufacturing costs	19	0	0	19	0	0	0	0	19	1
Air Quality	5	5	0	0	0	0	0	0	5	1
Biodiversity	8	8	0	0	0	0	0	0	8	1
Labour Impact	7	0	7	0	0	0	0	0	7	1
Workplace Conditions	21	0	21	0	0	0	0	0	21	1
Child Labour	8	0	8	0	0	0	0	0	8	1
Capital costs	4	0	0	4	0	0	0	0	4	1
Other costs	30	0	0	29	0	0	0	1	30	2
Materials costs	3	0	0	3	0	0	0	0	3	1
Transportation costs	2	0	0	2	0	0	0	0	2	1
Maintenance costs	6	0	0	6	0	0	0	0	6	1
Waste management costs	6	0	0	6	0	0	0	0	6	1
Personell costs	4	0	0	4	0	0	0	0	4	1
Forced Labour	5	0	5	0	0	0	0	0	5	1
Soil Quality	8	8	0	0	0	0	0	0	8	1
Supply chain traceability	27	0	15	12	0	0	0	0	27	2
Wages and Salaries	10	0	10	0	0	0	0	0	10	1
Water Pollution	2	2	0	0	0	0	0	0	2	1
Work Fairness	28	0	28	0	0	0	0	0	28	1
Worker Rights	22	0	22	0	0	0	0	0	22	1
Remediation of contamination activities/sites	1	1	0	0	0	0	0	0	1	1
Asset integrity and critical incident management	1	1	0	0	0	0	0	0	1	1
Corporate Social Responsibility	57	3	40	2	0	0	0	12	57	4
Indigenous Rights	9	0	9	0	0	0	0	0	9	1
Impacts on local communities	25	0	25	0	0	0	0	0	25	1
Eutrophication	5	5	0	0	0	0	0	0	5	1
Human Toxicity	5	5	0	0	0	0	0	0	5	1
Child Welfare	12	0	12	0	0	0	0	0	12	1
Animal Welfare	13	4	9	0	0	0	0	0	13	2
Cost-effectiveness	1	0	1	0	0	0	0	0	1	1
Geographical Accessibility of the Product	1	0	0	1	0	0	0	0	1	1
Renewable Energy	2	2	0	0	0	0	0	0	2	1
Packaging optimization	4	4	0	0	0	0	0	0	4	1
Manufacturing Comparison	1	1	0	0	0	0	0	0	1	1
Diversity of technological options	1	0	1	0	0	0	0	0	1	1
Resource Independence	3	0	3	0	0	0	0	0	3	1
Community Resilience	1	0	1	0	0	0	0	0	1	1
Capacity building	9	0	9	0	0	0	0	0	9	1
Habitat diversity and connectivity	1	1	0	0	0	0	0	0	1	1
Renewable resources	2	2	0	0	0	0	0	0	2	1
Stakeholders Engagement	20	0	19	0	0	0	0	1	20	2
Support to vulnerable people	3	0	3	0	0	0	0	0	3	1
Food quality and safety	2	0	0	2	0	0	0	0	2	1
Criminality	5	0	5	0	0	0	0	0	5	1
Education Access	6	0	6	0	0	0	0	0	6	1
Housing Quality	2	0	2	0	0	0	0	0	2	1
Poverty Alleviation	6	0	6	0	0	0	0	0	6	1
Conflict-Free Sourcing	5	0	5	0	0	0	0	0	5	1
Migrant Labour	1	0	1	0	0	0	0	0	1	1
Violation of regulations	2	0	2	0	0	0	0	0	2	1
Process scalability	0	0	0	0	0	0	0	0	0	0
Use of bio-based materials	1	1	0	0	0	0	0	0	1	1
Company governace	1	0	1	0	0	0	0	0	1	1
Infrastructure Management	1	0	1	0	0	0	0	0	1	1
Agricultural Productivity	2	0	2	0	0	0	0	0	2	1
Cultural Heritage Protection	4	0	4	0	0	0	0	0	4	1
End-of-life information	2	0	2	0	0	0	0	0	2	1
Migrant Integration	1	0	1	0	0	0	0	0	1	1
Sexual harassment	4	0	4	0	0	0	0	0	4	1
Water acidification	1	1	0	0	0	0	0	0	1	1
0	0	0	0	0	0	0	0	0	0	0

## Sheet: tools stats
Revised common name	WASP	NGRA framework	AdMa_overview	AdMaCat	Agent_network	Early4AdMa	ECHA_SEA	GRI_standards	ISA_chemicals	ivl_LCBROM	SUNRISE_WP3	LicaraNanoSCAN	Screening MCDA NANORIGO	SAFA_FAO	SLCA_exploration	SMM	Socio_economic_SSbD	TIER1B_SUNSHINE	UNEP_categories	JRC-SSbD framework	Australian_impact_analysis	Total occurrences	n° of different tools considering it
Contribution to SDGs	3	0	0	0	0	0	0	0	0	0	0	0	1	0	0	0	0	0	0	0	0	4	2
Energy Consumption	0	1	1	2	0	3	0	0	0	3	4	1	1	1	0	0	0	3	0	0	0	20	10
Resource Efficiency	0	1	2	1	0	1	0	0	0	0	2	1	2	1	0	1	0	1	0	2	0	15	11
Climate Change	0	1	0	0	0	3	1	1	1	0	0	0	1	0	0	0	0	4	0	1	0	13	8
Emissions	0	1	1	3	0	0	0	2	0	1	18	2	6	1	0	0	0	6	0	0	1	42	11
Functionality	0	2	1	0	0	1	6	0	0	0	6	8	6	0	0	0	0	17	7	3	0	57	10
Environment resilience and vulnerability	0	1	0	0	0	0	1	0	0	0	0	0	0	0	0	0	0	0	0	0	1	3	3
Innovation and R&D	0	1	2	0	1	0	1	0	0	3	1	2	4	0	0	0	1	0	3	2	1	22	12
Market dimension and Application Potential	0	3	3	0	3	1	0	0	0	2	3	3	0	2	0	0	1	0	1	0	5	27	11
Revenues	0	1	0	0	0	0	8	0	0	0	1	1	0	0	0	0	0	0	0	0	0	11	4
Economic Benefits	0	1	0	0	0	0	0	1	0	0	0	0	0	0	0	0	0	4	0	0	2	8	4
Social improvement	0	2	1	0	0	0	1	0	0	0	1	1	0	0	0	0	0	0	0	5	3	14	7
Occupational safety	0	1	0	0	0	0	0	0	0	2	0	0	0	0	0	0	1	0	12	3	0	19	5
Consumer Health and Safety	0	1	0	0	0	0	0	0	0	0	2	0	0	0	0	0	0	0	3	1	1	8	5
Healthcare Access	0	1	0	0	0	0	0	0	0	0	0	0	0	0	2	0	1	0	0	1	1	6	5
Employment	0	1	0	0	0	0	12	2	0	0	0	1	2	3	1	0	1	2	4	4	1	34	12
Persistent, bioaccumulative and toxic	0	0	2	0	0	2	0	0	0	0	3	0	0	0	0	0	0	0	0	0	0	7	3
Circular Economy	0	0	5	1	0	6	0	0	0	1	11	1	3	0	0	0	0	5	0	0	0	33	8
Critical materials	0	0	1	1	0	1	0	0	0	1	1	0	1	0	0	1	0	1	0	0	0	8	8
Eco-Toxicity	0	0	2	0	0	0	1	0	2	2	6	0	0	0	0	0	0	0	0	0	0	13	5
Hazardous substances or materials	0	0	1	0	0	4	0	0	0	0	0	2	0	0	0	0	0	0	1	0	0	8	4
Data management and Transparency	0	0	1	0	0	0	0	3	0	0	2	0	0	1	0	0	0	0	4	2	2	15	7
Environmental exposure, fate, stability and trasformation	0	0	0	0	0	0	0	0	0	0	0	0	0	0	0	0	0	0	0	0	0	0	0
Chemical/material within the scope of availalbe legislations	0	0	5	0	0	10	0	0	0	0	0	3	1	0	0	0	0	0	6	0	0	25	5
Recognised techniques for characterisation and exposure estimation	0	0	3	0	0	0	0	0	0	0	0	0	0	0	0	0	0	0	0	0	0	3	1
Waste production and management	0	0	1	2	0	2	0	2	0	2	6	9	5	1	0	1	1	5	0	0	0	37	12
Land Consumption	0	0	0	1	0	3	1	1	0	0	0	0	0	0	0	0	0	0	0	0	0	6	4
Ozone depletion	0	0	0	1	0	0	0	0	1	0	1	0	1	0	0	0	0	0	0	2	0	6	5
Water Consumption	0	0	0	1	0	3	1	0	0	0	5	0	4	1	0	0	0	3	0	1	0	19	8
Conflicts Management	0	0	0	0	1	0	0	1	0	0	0	0	0	1	0	0	0	0	1	1	0	5	5
Consumer Benefits	0	0	0	0	1	0	1	0	0	1	3	0	0	0	0	0	1	0	1	5	2	15	8
Process Optimization	0	0	0	0	1	0	0	0	0	0	1	1	0	0	0	0	0	2	0	0	1	6	5
Use costs	0	0	0	0	0	0	12	0	0	1	0	1	3	0	0	0	0	0	0	1	0	18	5
Manufacturing costs	0	0	0	0	0	0	12	0	1	1	1	1	0	0	0	0	0	3	0	0	0	19	6
Air Quality	0	0	0	0	0	0	1	0	1	0	0	0	0	1	0	0	0	0	0	2	0	5	4
Biodiversity	0	0	0	0	0	0	2	1	0	0	0	0	0	5	0	0	0	0	0	0	0	8	3
Labour Impact	0	0	0	0	0	0	6	0	0	0	0	0	0	0	0	0	0	0	0	0	1	7	2
Workplace Conditions	0	0	0	0	0	0	6	2	0	0	1	0	1	1	0	0	3	0	4	3	0	21	8
Child Labour	0	0	0	0	0	0	1	0	0	0	0	0	0	1	0	0	1	0	3	2	0	8	5
Capital costs	0	0	0	0	0	0	3	0	1	0	0	0	0	0	0	0	0	0	0	0	0	4	2
Other costs	0	0	0	0	0	0	17	1	0	0	1	0	1	5	0	0	0	0	0	0	5	30	6
Materials costs	0	0	0	0	0	0	1	0	1	0	0	0	0	0	0	0	0	1	0	0	0	3	3
Transportation costs	0	0	0	0	0	0	1	0	0	0	0	0	0	0	0	0	0	1	0	0	0	2	2
Maintenance costs	0	0	0	0	0	0	4	0	0	0	0	0	0	0	0	0	0	2	0	0	0	6	2
Waste management costs	0	0	0	0	0	0	1	0	0	2	0	0	0	0	0	0	0	3	0	0	0	6	3
Personell costs	0	0	0	0	0	0	3	0	0	0	0	0	1	0	0	0	0	0	0	0	0	4	2
Forced Labour	0	0	0	0	0	0	1	1	0	0	0	0	0	1	0	0	1	0	0	1	0	5	5
Soil Quality	0	0	0	0	0	0	1	0	1	0	0	0	1	4	0	0	0	0	0	1	0	8	5
Supply chain traceability	0	0	0	0	0	0	1	5	0	1	0	0	2	3	0	0	1	5	7	2	0	27	9
Wages and Salaries	0	0	0	0	0	0	1	2	0	0	0	0	0	1	0	0	1	0	2	2	1	10	7
Water Pollution	0	0	0	0	0	0	1	0	0	0	0	0	0	1	0	0	0	0	0	0	0	2	2
Work Fairness	0	0	0	0	0	0	1	7	0	0	0	0	1	2	2	0	2	0	9	4	0	28	8
Worker Rights	0	0	0	0	0	0	2	0	0	0	0	0	0	1	0	0	1	0	14	4	0	22	5
Remediation of contamination activities/sites	0	0	0	0	0	0	0	1	0	0	0	0	0	0	0	0	0	0	0	0	0	1	1
Asset integrity and critical incident management	0	0	0	0	0	0	0	1	0	0	0	0	0	0	0	0	0	0	0	0	0	1	1
Corporate Social Responsibility	0	0	0	0	0	0	0	2	0	0	5	0	0	12	0	0	2	0	32	4	0	57	6
Indigenous Rights	0	0	0	0	0	0	0	1	0	0	0	0	0	1	0	0	1	0	4	1	1	9	6
Impacts on local communities	0	0	0	0	0	0	0	1	0	0	0	0	1	3	1	0	2	2	5	9	1	25	9
Eutrophication	0	0	0	0	0	0	0	0	1	0	0	0	1	0	0	0	0	0	0	3	0	5	3
Human Toxicity	0	0	0	0	0	0	0	0	2	0	0	0	0	0	0	0	0	0	0	3	0	5	2
Child Welfare	0	0	0	0	0	0	0	0	0	1	0	0	0	0	3	0	0	0	3	5	0	12	4
Animal Welfare	0	0	0	0	0	0	0	0	0	0	2	0	0	1	0	0	1	0	7	1	1	13	6
Cost-effectiveness	0	0	0	0	0	0	0	0	0	0	1	0	0	0	0	0	0	0	0	0	0	1	1
Geographical Accessibility of the Product	0	0	0	0	0	0	0	0	0	0	1	0	0	0	0	0	0	0	0	0	0	1	1
Renewable Energy	0	0	0	0	0	0	0	0	0	0	2	0	0	0	0	0	0	0	0	0	0	2	1
Packaging optimization	0	0	0	0	0	0	0	0	0	0	3	0	0	0	0	0	0	1	0	0	0	4	2
Manufacturing Comparison	0	0	0	0	0	0	0	0	0	0	0	1	0	0	0	0	0	0	0	0	0	1	1
Diversity of technological options	0	0	0	0	0	0	0	0	0	0	0	0	1	0	0	0	0	0	0	0	0	1	1
Resource Independence	0	0	0	0	0	0	0	0	0	0	0	0	3	0	0	0	0	0	0	0	0	3	1
Community Resilience	0	0	0	0	0	0	0	0	0	0	0	0	1	0	0	0	0	0	0	0	0	1	1
Capacity building	0	0	0	0	0	0	0	0	0	0	0	0	0	1	1	0	0	1	6	0	0	9	4
Habitat diversity and connectivity	0	0	0	0	0	0	0	0	0	0	0	0	0	1	0	0	0	0	0	0	0	1	1
Renewable resources	0	0	0	0	0	0	0	0	0	0	0	0	0	1	0	0	0	1	0	0	0	2	2
Stakeholders Engagement	0	0	0	0	0	0	0	0	0	0	0	0	0	1	0	0	0	0	12	7	0	20	3
Support to vulnerable people	0	0	0	0	0	0	0	0	0	0	0	0	0	1	0	0	0	0	0	2	0	3	2
Food quality and safety	0	0	0	0	0	0	0	0	0	0	0	0	0	2	0	0	0	0	0	0	0	2	1
Criminality	0	0	0	0	0	0	0	0	0	0	0	0	0	0	1	0	0	0	0	0	4	5	2
Education Access	0	0	0	0	0	0	0	0	0	0	0	0	0	0	3	0	0	0	1	2	0	6	3
Housing Quality	0	0	0	0	0	0	0	0	0	0	0	0	0	0	1	0	0	0	0	1	0	2	2
Poverty Alleviation	0	0	0	0	0	0	0	0	0	0	0	0	0	0	1	0	1	0	3	1	0	6	4
Conflict-Free Sourcing	0	0	0	0	0	0	0	0	0	0	0	0	0	0	0	0	2	1	1	1	0	5	4
Migrant Labour	0	0	0	0	0	0	0	0	0	0	0	0	0	0	0	0	1	0	0	0	0	1	1
Violation of regulations	0	0	0	0	0	0	0	0	0	0	0	0	0	0	0	0	1	0	1	0	0	2	2
Process scalability	0	0	0	0	0	0	0	0	0	0	0	0	0	0	0	0	0	0	0	0	0	0	0
Use of bio-based materials	0	0	0	0	0	0	0	0	0	0	0	0	0	0	0	0	0	1	0	0	0	1	1
Company governace	0	0	0	0	0	0	0	0	0	0	0	0	0	0	0	0	0	0	1	0	0	1	1
Infrastructure Management	0	0	0	0	0	0	0	0	0	0	0	0	0	0	0	0	0	0	1	0	0	1	1
Agricultural Productivity	0	0	0	0	0	0	0	0	0	0	0	0	0	0	0	0	0	0	2	0	0	2	1
Cultural Heritage Protection	0	0	0	0	0	0	0	0	0	0	0	0	0	0	0	0	0	0	3	1	0	4	2
End-of-life information	0	0	0	0	0	0	0	0	0	0	0	0	0	0	0	0	0	0	1	1	0	2	2
Migrant Integration	0	0	0	0	0	0	0	0	0	0	0	0	0	0	0	0	0	0	1	0	0	1	1
Sexual harassment	0	0	0	0	0	0	0	0	0	0	0	0	0	0	0	0	0	0	3	1	0	4	2
Water acidification	0	0	0	0	0	0	0	0	0	0	0	0	0	0	0	0	0	0	0	1	0	1	1
0	0	0	0	0	0	0	0	0	0	0	0	0	0	0	0	0	0	0	0	0	0	0	0

## Sheet: tools by dimension stats
	Good Governance Indicators
Revised common name	WASP	NGRA framework	AdMa_overview	AdMaCat	Agent_network	Early4AdMa	ECHA_SEA	GRI_standards	ISA_chemicals	ivl_LCBROM	SUNRISE_WP3	LicaraNanoSCAN	Screening MCDA NANORIGO	SAFA_FAO	SLCA_exploration	SMM	Socio_economic_SSbD	TIER1B_SUNSHINE	UNEP_categories	JRC-SSbD framework	Australian_impact_analysis	Total occurrences	n° of different tools considering it
Contribution to SDGs	0	0	0	0	0	0	0	0	0	0	0	0	0	0	0	0	0	0	0	0	0	0	0
Energy Consumption	0	0	0	0	0	0	0	0	0	0	0	0	0	0	0	0	0	0	0	0	0	0	0
Resource Efficiency	0	0	0	0	0	0	0	0	0	0	0	0	0	0	0	0	0	0	0	0	0	0	0				Dimensions
Climate Change	0	0	0	0	0	0	0	0	0	0	0	0	0	0	0	0	0	0	0	0	0	0	0				Environmental Sustainability Indicators
Emissions	0	0	0	0	0	0	0	0	0	0	0	0	0	0	0	0	0	0	0	0	0	0	0				Economic sustainability Indicators
Functionality	0	0	0	0	0	0	0	0	0	0	0	0	0	0	0	0	0	0	0	0	0	0	0				Social sustainability Indicators
Environment resilience and vulnerability	0	0	0	0	0	0	0	0	0	0	0	0	0	0	0	0	0	0	0	0	0	0	0				Regulatory Indicators
Innovation and R&D	0	0	0	0	0	0	0	0	0	0	0	0	0	0	0	0	0	0	0	0	0	0	0				Good Governance Indicators
Market dimension and Application Potential	0	0	0	0	0	0	0	0	0	0	0	0	0	0	0	0	0	0	0	0	0	0	0				Functionality Indicators
Revenues	0	0	0	0	0	0	0	0	0	0	0	0	0	0	0	0	0	0	0	0	0	0	0
Economic Benefits	0	0	0	0	0	0	0	0	0	0	0	0	0	0	0	0	0	0	0	0	0	0	0
Social improvement	0	0	0	0	0	0	0	0	0	0	0	0	0	0	0	0	0	0	0	0	0	0	0
Occupational safety	0	0	0	0	0	0	0	0	0	0	0	0	0	0	0	0	0	0	0	0	0	0	0
Consumer Health and Safety	0	0	0	0	0	0	0	0	0	0	0	0	0	0	0	0	0	0	0	0	0	0	0
Healthcare Access	0	0	0	0	0	0	0	0	0	0	0	0	0	0	0	0	0	0	0	0	0	0	0
Employment	0	0	0	0	0	0	0	0	0	0	0	0	0	0	0	0	0	0	0	0	0	0	0
Persistent, bioaccumulative and toxic	0	0	0	0	0	0	0	0	0	0	0	0	0	0	0	0	0	0	0	0	0	0	0
Circular Economy	0	0	0	0	0	0	0	0	0	0	0	0	0	0	0	0	0	0	0	0	0	0	0
Critical materials	0	0	0	0	0	0	0	0	0	0	0	0	0	0	0	0	0	0	0	0	0	0	0
Eco-Toxicity	0	0	0	0	0	0	0	0	0	0	0	0	0	0	0	0	0	0	0	0	0	0	0
Hazardous substances or materials	0	0	0	0	0	0	0	0	0	0	0	0	0	0	0	0	0	0	0	0	0	0	0
Data management and Transparency	0	0	0	0	0	0	0	0	0	0	0	0	0	0	0	0	0	0	0	0	0	0	0
Environmental exposure, fate, stability and transformation	0	0	0	0	0	0	0	0	0	0	0	0	0	0	0	0	0	0	0	0	0	0	0
Chemical/material within the scope of availalbe legislations	0	0	0	0	0	0	0	0	0	0	0	0	0	0	0	0	0	0	0	0	0	0	0
Recognised techniques for characterisation and exposure estimation	0	0	0	0	0	0	0	0	0	0	0	0	0	0	0	0	0	0	0	0	0	0	0
Waste production and management	0	0	0	0	0	0	0	0	0	0	0	0	0	0	0	0	0	0	0	0	0	0	0
Land Consumption	0	0	0	0	0	0	0	0	0	0	0	0	0	0	0	0	0	0	0	0	0	0	0
Ozone depletion	0	0	0	0	0	0	0	0	0	0	0	0	0	0	0	0	0	0	0	0	0	0	0
Water Consumption	0	0	0	0	0	0	0	0	0	0	0	0	0	0	0	0	0	0	0	0	0	0	0
Conflicts Management	0	0	0	0	0	0	0	0	0	0	0	0	0	1	0	0	0	0	0	0	0	1	1
Consumer Benefits	0	0	0	0	0	0	0	0	0	0	0	0	0	0	0	0	0	0	0	0	0	0	0
Process Optimization	0	0	0	0	0	0	0	0	0	0	0	0	0	0	0	0	0	0	0	0	0	0	0
Use costs	0	0	0	0	0	0	0	0	0	0	0	0	0	0	0	0	0	0	0	0	0	0	0
Manufacturing costs	0	0	0	0	0	0	0	0	0	0	0	0	0	0	0	0	0	0	0	0	0	0	0
Air Quality	0	0	0	0	0	0	0	0	0	0	0	0	0	0	0	0	0	0	0	0	0	0	0
Biodiversity	0	0	0	0	0	0	0	0	0	0	0	0	0	0	0	0	0	0	0	0	0	0	0
Labour Impact	0	0	0	0	0	0	0	0	0	0	0	0	0	0	0	0	0	0	0	0	0	0	0
Workplace Conditions	0	0	0	0	0	0	0	0	0	0	0	0	0	0	0	0	0	0	0	0	0	0	0
Child Labour	0	0	0	0	0	0	0	0	0	0	0	0	0	0	0	0	0	0	0	0	0	0	0
Capital costs	0	0	0	0	0	0	0	0	0	0	0	0	0	0	0	0	0	0	0	0	0	0	0
Other costs	0	0	0	0	0	0	0	0	0	0	0	0	0	1	0	0	0	0	0	0	0	1	1
Materials costs	0	0	0	0	0	0	0	0	0	0	0	0	0	0	0	0	0	0	0	0	0	0	0
Transportation costs	0	0	0	0	0	0	0	0	0	0	0	0	0	0	0	0	0	0	0	0	0	0	0
Maintenance costs	0	0	0	0	0	0	0	0	0	0	0	0	0	0	0	0	0	0	0	0	0	0	0
Waste management costs	0	0	0	0	0	0	0	0	0	0	0	0	0	0	0	0	0	0	0	0	0	0	0
Personell costs	0	0	0	0	0	0	0	0	0	0	0	0	0	0	0	0	0	0	0	0	0	0	0
Forced Labour	0	0	0	0	0	0	0	0	0	0	0	0	0	0	0	0	0	0	0	0	0	0	0
Soil Quality	0	0	0	0	0	0	0	0	0	0	0	0	0	0	0	0	0	0	0	0	0	0	0
Supply chain traceability	0	0	0	0	0	0	0	0	0	0	0	0	0	0	0	0	0	0	0	0	0	0	0
Wages and Salaries	0	0	0	0	0	0	0	0	0	0	0	0	0	0	0	0	0	0	0	0	0	0	0
Water Pollution	0	0	0	0	0	0	0	0	0	0	0	0	0	0	0	0	0	0	0	0	0	0	0
Work Fairness	0	0	0	0	0	0	0	0	0	0	0	0	0	0	0	0	0	0	0	0	0	0	0
Worker Rights	0	0	0	0	0	0	0	0	0	0	0	0	0	0	0	0	0	0	0	0	0	0	0
Remediation of contamination activities/sites	0	0	0	0	0	0	0	0	0	0	0	0	0	0	0	0	0	0	0	0	0	0	0
Asset integrity and critical incident management	0	0	0	0	0	0	0	0	0	0	0	0	0	0	0	0	0	0	0	0	0	0	0
Corporate Social Responsibility	0	0	0	0	0	0	0	0	0	0	0	0	0	12	0	0	0	0	0	0	0	12	1
Indigenous Rights	0	0	0	0	0	0	0	0	0	0	0	0	0	0	0	0	0	0	0	0	0	0	0
Impacts on local communities	0	0	0	0	0	0	0	0	0	0	0	0	0	0	0	0	0	0	0	0	0	0	0
Eutrophication	0	0	0	0	0	0	0	0	0	0	0	0	0	0	0	0	0	0	0	0	0	0	0
Human Toxicity	0	0	0	0	0	0	0	0	0	0	0	0	0	0	0	0	0	0	0	0	0	0	0
Child Welfare	0	0	0	0	0	0	0	0	0	0	0	0	0	0	0	0	0	0	0	0	0	0	0
Animal Welfare	0	0	0	0	0	0	0	0	0	0	0	0	0	0	0	0	0	0	0	0	0	0	0
Cost-effectiveness	0	0	0	0	0	0	0	0	0	0	0	0	0	0	0	0	0	0	0	0	0	0	0
Geographical Accessibility of the Product	0	0	0	0	0	0	0	0	0	0	0	0	0	0	0	0	0	0	0	0	0	0	0
Renewable Energy	0	0	0	0	0	0	0	0	0	0	0	0	0	0	0	0	0	0	0	0	0	0	0
Packaging optimization	0	0	0	0	0	0	0	0	0	0	0	0	0	0	0	0	0	0	0	0	0	0	0
Manufacturing Comparison	0	0	0	0	0	0	0	0	0	0	0	0	0	0	0	0	0	0	0	0	0	0	0
Diversity of technological options	0	0	0	0	0	0	0	0	0	0	0	0	0	0	0	0	0	0	0	0	0	0	0
Resource Independence	0	0	0	0	0	0	0	0	0	0	0	0	0	0	0	0	0	0	0	0	0	0	0
Community Resilience	0	0	0	0	0	0	0	0	0	0	0	0	0	0	0	0	0	0	0	0	0	0	0
Capacity building	0	0	0	0	0	0	0	0	0	0	0	0	0	0	0	0	0	0	0	0	0	0	0
Habitat diversity and connectivity	0	0	0	0	0	0	0	0	0	0	0	0	0	0	0	0	0	0	0	0	0	0	0
Renewable resources	0	0	0	0	0	0	0	0	0	0	0	0	0	0	0	0	0	0	0	0	0	0	0
Stakeholders Engagement	0	0	0	0	0	0	0	0	0	0	0	0	0	1	0	0	0	0	0	0	0	1	1
Support to vulnerable people	0	0	0	0	0	0	0	0	0	0	0	0	0	0	0	0	0	0	0	0	0	0	0
Food quality and safety	0	0	0	0	0	0	0	0	0	0	0	0	0	0	0	0	0	0	0	0	0	0	0
Criminality	0	0	0	0	0	0	0	0	0	0	0	0	0	0	0	0	0	0	0	0	0	0	0
Education Access	0	0	0	0	0	0	0	0	0	0	0	0	0	0	0	0	0	0	0	0	0	0	0
Housing Quality	0	0	0	0	0	0	0	0	0	0	0	0	0	0	0	0	0	0	0	0	0	0	0
Poverty Alleviation	0	0	0	0	0	0	0	0	0	0	0	0	0	0	0	0	0	0	0	0	0	0	0
Conflict-Free Sourcing	0	0	0	0	0	0	0	0	0	0	0	0	0	0	0	0	0	0	0	0	0	0	0
Migrant Labour	0	0	0	0	0	0	0	0	0	0	0	0	0	0	0	0	0	0	0	0	0	0	0
Violation of regulations	0	0	0	0	0	0	0	0	0	0	0	0	0	0	0	0	0	0	0	0	0	0	0
Process scalability	0	0	0	0	0	0	0	0	0	0	0	0	0	0	0	0	0	0	0	0	0	0	0
Use of bio-based materials	0	0	0	0	0	0	0	0	0	0	0	0	0	0	0	0	0	0	0	0	0	0	0
Company governace	0	0	0	0	0	0	0	0	0	0	0	0	0	0	0	0	0	0	0	0	0	0	0
Infrastructure Management	0	0	0	0	0	0	0	0	0	0	0	0	0	0	0	0	0	0	0	0	0	0	0
Agricultural Productivity	0	0	0	0	0	0	0	0	0	0	0	0	0	0	0	0	0	0	0	0	0	0	0
Cultural Heritage Protection	0	0	0	0	0	0	0	0	0	0	0	0	0	0	0	0	0	0	0	0	0	0	0
End-of-life information	0	0	0	0	0	0	0	0	0	0	0	0	0	0	0	0	0	0	0	0	0	0	0
Migrant Integration	0	0	0	0	0	0	0	0	0	0	0	0	0	0	0	0	0	0	0	0	0	0	0
Sexual harassment	0	0	0	0	0	0	0	0	0	0	0	0	0	0	0	0	0	0	0	0	0	0	0
Water acidification	0	0	0	0	0	0	0	0	0	0	0	0	0	0	0	0	0	0	0	0	0	0	0
0	0	0	0	0	0	0	0	0	0	0	0	0	0	0	0	0	0	0	0	0	0	0	0

## Sheet: env
				Indicators' category	Number of tools per indicators' category within the environmental sustainability dimension	Indicators' category total occurrences within the environmental sustainability dimension
				Emissions	11	42
				Waste production and management	11	36
				Resource Efficiency	11	15
				Energy Consumption	10	20
				Circular Economy	8	31
				Water Consumption	8	18
				Climate Change	8	13
				Critical materials	8	8
				Eco-Toxicity	5	13
				Soil Quality	5	8
				Ozone depletion	5	6
				Environmental exposure, fate, stability and transformation	4	11
				Functionality	4	9
				Land Consumption	4	6
				Air Quality	4	5
				Environment resilience and vulnerability	4	4
				Persistent, bioaccumulative and toxic	3	7
				Hazardous substances or materials	3	7
				Biodiversity	3	7
				Eutrophication	3	5
				Animal Welfare	3	4
				Process Optimization	3	3
				Human Toxicity	2	5
				Packaging optimization	2	4
				Water Pollution	2	2
				Renewable resources	2	2
				Corporate Social Responsibility	1	3
				Renewable Energy	1	2
				Contribution to SDGs	1	1
				Innovation and R&D	1	1
				Market dimension and Application Potential	1	1
				Social improvement	1	1
				Chemical/material within the scope of availalbe legislations	1	1
				Remediation of contamination activities/sites	1	1
				Asset integrity and critical incident management	1	1
				Manufacturing Comparison	1	1
				Habitat diversity and connectivity	1	1
				Use of bio-based materials	1	1
				Water acidification	1	1

## Sheet: soc
	Indicators' category	Number of tools per indicators' category within the social sustainability dimension	Indicators' category total occurrences within the social sustainability dimension
	Employment	12	31
	Impacts on local communities	9	25
	Work Fairness	8	28
	Workplace Conditions	8	21
	Functionality	7	25
	Consumer Benefits	7	13
	Innovation and R&D	7	11
	Wages and Salaries	7	10
	Social improvement	6	13
	Indigenous Rights	6	9
	Corporate Social Responsibility	5	40
	Worker Rights	5	22
	Occupational safety	5	19
	Data management and Transparency	5	13
	Consumer Health and Safety	5	8
	Child Labour	5	8
	Healthcare Access	5	6
	Forced Labour	5	5
	Supply chain traceability	4	15
	Child Welfare	4	12
	Capacity building	4	9
	Poverty Alleviation	4	6
	Conflict-Free Sourcing	4	5
	Conflicts Management	4	4
	Animal Welfare	3	9
	Education Access	3	6
	Market dimension and Application Potential	3	4
	Stakeholders Engagement	2	19
	Labour Impact	2	7
	Criminality	2	5
	Cultural Heritage Protection	2	4
	Sexual harassment	2	4
	Support to vulnerable people	2	3
	Contribution to SDGs	2	2
	Use costs	2	2
	Housing Quality	2	2
	Violation of regulations	2	2
	End-of-life information	2	2
	Chemical/material within the scope of availalbe legislations	1	6
	Resource Independence	1	3
	Agricultural Productivity	1	2
	Hazardous substances or materials	1	1
	Waste production and management	1	1
	Water Consumption	1	1
	Cost-effectiveness	1	1
	Diversity of technological options	1	1
	Community Resilience	1	1
	Migrant Labour	1	1
	Company governace	1	1
	Infrastructure Management	1	1
	Migrant Integration	1	1

## Sheet: econ
	Indicators' category	Number of tools per indicators' category within the economic sustainability dimension	Indicators' category total occurrences within the economic sustainability dimension
	Market dimension and Application Potential	8	22
	Innovation and R&D	7	10
	Other costs	6	29
	Manufacturing costs	6	19
	Supply chain traceability	5	12
	Functionality	5	7
	Use costs	4	16
	Revenues	4	11
	Economic Benefits	4	8
	Waste management costs	3	6
	Materials costs	3	3
	Maintenance costs	2	6
	Capital costs	2	4
	Personell costs	2	4
	Employment	2	3
	Circular Economy	2	2
	Process Optimization	2	2
	Transportation costs	2	2
	Corporate Social Responsibility	2	2
	Consumer Benefits	1	2
	Food quality and safety	1	2
	Contribution to SDGs	1	1
	Data management and Transparency	1	1
	Geographical Accessibility of the Product	1	1

## Sheet: reg
		Indicators' category	Number of tools per indicators' category within the regulation dimension	Indicators' category total occurrences within the regulation dimension
		Chemical/material within the scope of availalbe legislations	3	18
		Recognised techniques for characterisation and exposure estimation	1	3
		Data management and Transparency	1	1

[truncated: 1 more sheets: gov]
