# Supplementary material
Source: Royal Society of Chemistry journal article supplement (doi:10.1039/d5su00883b)
Supplement: d5su00883b2.pdf [file d5su00883b2.pdf]

## SUPPLEMENTARY INFORMATION

*Table A 1: List of the 29 tools analysed in this study. Each tool is identified by a number. The table includes tools' name (attributed by the author of this study if no official name is available), year of release, sector of application, main objective, assessment structure, target user, developers, and reference. Tools specifically developed for AdMa assessment show their sector of application highlighted.*

| Number | Tool name     | Release year | Sector of application | Objective                                                                                                                                                                                            | Assessment structure                                   | Target user                                                                                  | Developers                                                                                                                                          | References |
|--------|---------------|--------------|-----------------------|------------------------------------------------------------------------------------------------------------------------------------------------------------------------------------------------------|--------------------------------------------------------|----------------------------------------------------------------------------------------------|-----------------------------------------------------------------------------------------------------------------------------------------------------|------------|
| 1      | AdMa_overview | 2020         | AdMa                  | To provide an overview of advanced materials and potential needs to act on chemical safety.                                                                                                          | set of aspects or indicators or criteria or parameters | regulators or national authorities or general decision-makers                                | German Environment Agency                                                                                                                           | (18)       |
| 2      | AdMaCat       | 2024         | AdMa                  | AdMaCat can assist in identifying data gaps and inform decisions regarding the design of tailored AdMa by optimizing the balance of functionality, safety, and sustainability in a circular economy. | questionnaire                                          | enterprises/industries of any dimensions/any kind of organization/or sustainability appliers | Department of Environmental and Resource Engineering, Technical University of Denmark<br>Tecnológico de Monterrey, Escuela de Ingeniería y Ciencias | (19)       |

| Number | Tool name                  | Release year | Sector of application              | Objective                                                                                                                                                                                       | Assessment structure                                   | Target user                                                                                  | Developers                                                                                                             | References |
|--------|----------------------------|--------------|------------------------------------|-------------------------------------------------------------------------------------------------------------------------------------------------------------------------------------------------|--------------------------------------------------------|----------------------------------------------------------------------------------------------|------------------------------------------------------------------------------------------------------------------------|------------|
| 3      | Agent_network              | 2007         | Nanomaterials                      | To analyse agent network for sustainable governance of emerging technologies                                                                                                                    | set of aspects or indicators or criteria or parameters | innovators                                                                                   | Institute for Environmental Decisions, Natural and Social Science Interface, ETH Zurich, CHN, 8092 Zurich, Switzerland | (20)       |
| 4      | Australian_impact_analysis | 2023         | Emerging problems or new proposals | To develop a guide for impact analysis (a preliminary assessment form)                                                                                                                          | set of aspects or indicators or criteria or parameters | regulators or national authorities or general decision-makers                                | OIA (Office of Impact Analysis) Australian Government                                                                  | (21)       |
| 5      | CENARIOS®                  | 2007         | Nanomaterials                      | CENARIOS® represents the World's First Certifiable Risk Management and Monitoring System for Nanotechnologies                                                                                   | questionnaire                                          | enterprises/industries of any dimensions/any kind of organization/or sustainability appliers | the Innovation Society Ltd. (St. Gallen, Switzerland) and TÜV SÜD (Munich, Germany)                                    | (22)       |
| 6      | Early4AdMa                 | 2023         | AdMa                               | Pre-regulatory risk governance tool. The outcome should help regulatory decision makers to take action so that potential issues posed by advanced materials can be addressed at an early stage. | questionnaire                                          | regulators or national authorities or general decision-makers                                | Developed by RIVM and further communicated by the OECD advanced materials group                                        | (23)       |

| Number | Tool name                            | Release year | Sector of application | Objective                                                                                                                                                                                                                                                                                                                                                           | Assessment structure                                   | Target user                                                                                  | Developers                                                                                                                         | References |
|--------|--------------------------------------|--------------|-----------------------|---------------------------------------------------------------------------------------------------------------------------------------------------------------------------------------------------------------------------------------------------------------------------------------------------------------------------------------------------------------------|--------------------------------------------------------|----------------------------------------------------------------------------------------------|------------------------------------------------------------------------------------------------------------------------------------|------------|
| 7      | ECHA_SEA                             | 2008         | Chemicals             | To evaluate what costs and benefits an action related to chemicals restriction will create for society (analyse proposed restrictions)                                                                                                                                                                                                                              | set of aspects or indicators or criteria or parameters | enterprises/industries of any dimensions/any kind of organization/or sustainability appliers | European Chemicals Agency (drafted and discussed within the REACH Implementation Projects led by the European Commission services) | (24)       |
| 8      | Global Social Compliance Programme 1 | 2010         | Sector-independent    | To develop a framework of reference requirements as a reference tool for employment sites across the whole supply chain. The Reference requirements reflect the need to comply with existing local, national and international legislation and provide a common understanding of good environmental practice.                                                       | framework or guideline                                 | enterprises/industries of any dimensions/any kind of organization/or sustainability appliers | Global Social Compliance Programme facilitated by The Consumer Goods Forum                                                         | (25)       |
| 9      | Global Social Compliance Programme 2 | 2013         | Sector-independent    | To provide a general overview of the management system (MS) approach that can help a Supplier to consistently improve its level of social compliance and to provide the Supplier with best practice elements of an effective social and labour policy management system, which can be integrated with other management functions to promote continuous improvement. | framework or guideline                                 | enterprises/industries of any dimensions/any kind of organization/or sustainability appliers | Global Social Compliance Programme facilitated by The Consumer Goods Forum                                                         | (26)       |

| Number | Tool name                            | Release year | Sector of application | Objective                                                                                                                                                         | Assessment structure                                   | Target user                                                                                  | Developers                                                                                                                                                                                                                        | References |
|--------|--------------------------------------|--------------|-----------------------|-------------------------------------------------------------------------------------------------------------------------------------------------------------------|--------------------------------------------------------|----------------------------------------------------------------------------------------------|-----------------------------------------------------------------------------------------------------------------------------------------------------------------------------------------------------------------------------------|------------|
| 10     | Global Social Compliance Programme 3 | 2013         | Sector-independent    | To support buying organisations in monitoring and improving social compliance performance in the whole supply chain.                                              | framework or guideline                                 | enterprises/industries of any dimensions/any kind of organization/or sustainability appliers | Global Social Compliance Programme facilitated by The Consumer Goods Forum                                                                                                                                                        | (27)       |
| 11     | Green Chemistry Nanotechnology       | 2016         | Nanomaterials         | To develop a mainly qualitative (but also quantitative) guidance and principles for developing safer and more sustainable nanomaterials and nano-enabled products | framework or guideline                                 | innovators                                                                                   | Department of Chemistry and Biochemistry and Materials Science Institute, University of Oregon                                                                                                                                    | (28)       |
| 12     | GRI Standards                        | 2022         | Sector-independent    | To guide sustainability reporting                                                                                                                                 | set of aspects or indicators or criteria or parameters | enterprises/industries of any dimensions/any kind of organization/or sustainability appliers | Global Sustainability Standards Boars (GSSB)                                                                                                                                                                                      | (29)       |
| 13     | ISA_chemicals                        | 2015         | Chemicals             | To develop a holistic methodology that enables the evaluation and comparison of process sustainability in an integrated system.                                   | set of aspects or indicators or criteria or parameters | enterprises/industries of any dimensions/any kind of organization/or sustainability appliers | School of Environment and Safety Engineering, Qingdao University of Science and Technology, Qingdao 266042, China and School of Chemistry and Chemical Engineering, South China University of Technology, Guangzhou 510640, China | (17)       |

| Number | Tool name             | Release year | Sector of application | Objective                                                                                                                                                                             | Assessment structure                                   | Target user                                                                                  | Developers                         | References |
|--------|-----------------------|--------------|-----------------------|---------------------------------------------------------------------------------------------------------------------------------------------------------------------------------------|--------------------------------------------------------|----------------------------------------------------------------------------------------------|------------------------------------|------------|
| 14     | ivl_LCBROM            | 2025         | Sector-independent    | To provide a screening sustainability assessment for chemicals, materials or processes                                                                                                | questionnaire                                          | innovators                                                                                   | IVL Svenska Miljöinstitutet        | (30)       |
| 15     | JRC-SSbD framework    | 2022         | Chemicals             | To guide the development of chemicals and materials that are both safe for human health and the environment and sustainable throughout their life cycle, from production to disposal. | set of aspects or indicators or criteria or parameters | innovators                                                                                   | JRC                                | (1)        |
| 16     | LICARA InnovationSCAN | 2021         | Nanomaterials         | To provide a pro-active approach towards the elimination and mitigation of potential risks and thus ensures sustainable development of the devices along their innovation value chain | questionnaire                                          | enterprises/industries of any dimensions/any kind of organization/or sustainability appliers | Empa and TNO                       | (31)       |
| 17     | LICARA NanoSCAN       | 2014         | Nanomaterials         | To guide SMEs through their decision-making processes regarding new nanoproducts, but also to re-evaluate existing nanoproducts in order to improve them.                             | questionnaire                                          | enterprises/industries of any dimensions/any kind of organization/or sustainability appliers | Empa, TNO and university of Zurich | (32)       |

| Number | Tool name      | Release year | Sector of application | Objective                                                                                                                                                                                                                                                                                                                                                                                                                                                                                                                                                                                                                                                                              | Assessment structure                                   | Target user                                                                                  | Developers                                                                   | References |
|--------|----------------|--------------|-----------------------|----------------------------------------------------------------------------------------------------------------------------------------------------------------------------------------------------------------------------------------------------------------------------------------------------------------------------------------------------------------------------------------------------------------------------------------------------------------------------------------------------------------------------------------------------------------------------------------------------------------------------------------------------------------------------------------|--------------------------------------------------------|----------------------------------------------------------------------------------------------|------------------------------------------------------------------------------|------------|
| 18     | NanoRiskCat    | 2011         | Nanomaterials         | To identify, categorize and rank exposures and effects of nanomaterials used in consumer products based on data available in the peer-reviewed scientific literature and other regulatory relevant sources of information and data. The primary focus was on nanomaterials relevant for professional end-users and consumers as, as well as nanomaterials released into the environment. The wider goal of NanoRiskCat is to help manufacturers, down-stream end-users, regulators and other stakeholders to evaluate, rank and communicate the potential for exposure and effects through a tiered approach in which the specific applications of a given nanomaterial are evaluated. | questionnaire                                          | enterprises/industries of any dimensions/any kind of organization/or sustainability appliers | DTU Environment and the National Research Centre for the Working Environment | (33).      |
| 19     | NGRA framework | 2024         | AdMa                  | To applying New Approach Methodologies (NAMs) for safe by design and regulatory risk assessment of advanced nanomaterials (AdNMs).                                                                                                                                                                                                                                                                                                                                                                                                                                                                                                                                                     | set of aspects or indicators or criteria or parameters | innovators                                                                                   | see paper authors                                                            | (34)       |
| 20     | SAFA FAO       | 2012         | Food and agriculture  | To support sustainable development of the food and agriculture sector, from primary production in agriculture, forestry and fisheries, through manufacturing and to the point of sale to the consumer to ensure human rights and well-being                                                                                                                                                                                                                                                                                                                                                                                                                                            | set of aspects or indicators or criteria or parameters | enterprises/industries of any dimensions/any kind of organization/or sustainability appliers | The Natural Resources Management and Environment Department of FAO           | (35)       |

| Number | Tool name               | Release year | Sector of application | Objective                                                                                                                                                                                                                                                                                                                                                                                                               | Assessment structure                                   | Target user                                                                                  | Developers                                                                                                                        | References |
|--------|-------------------------|--------------|-----------------------|-------------------------------------------------------------------------------------------------------------------------------------------------------------------------------------------------------------------------------------------------------------------------------------------------------------------------------------------------------------------------------------------------------------------------|--------------------------------------------------------|----------------------------------------------------------------------------------------------|-----------------------------------------------------------------------------------------------------------------------------------|------------|
|        |                         |              |                       | without depleting or diminishing the capacity of Earth's ecosystems to support life now or for future generations.                                                                                                                                                                                                                                                                                                      |                                                        |                                                                                              |                                                                                                                                   |            |
| 21     | Screening MCDA NANORIGO | 2023         | Sector-independent    | To develop a set of weighted criteria for use in a stochastic multicriteria analysis to support decision-making for a broad range of societal stakeholders and to improve the assessment of new materials beyond a characterization of the risks to the environment and human health. To assess dealing with non-knowledge and derive assumptions about the behaviour of the product and its impact on affected systems | set of aspects or indicators or criteria or parameters | enterprises/industries of any dimensions/any kind of organization/or sustainability appliers | Developed within NANORIGO project                                                                                                 | (36)       |
| 22     | SLCA exploration        | 2008         | Sector-independent    | To explain how to incorporate the social dimension of sustainability into business decision-making                                                                                                                                                                                                                                                                                                                      | set of aspects or indicators or criteria or parameters | enterprises/industries of any dimensions/any kind of organization/or sustainability appliers | Department of Mechanical Engineering–Engineering Mechanics, Sustainable Futures Institute, Michigan Technological University, USA | (37)       |

| Number | Tool name           | Release year | Sector of application | Objective                                                                                                                                                                                                                                                                              | Assessment structure                                   | Target user                                                                                  | Developers                                                                                                                                                                        | References |
|--------|---------------------|--------------|-----------------------|----------------------------------------------------------------------------------------------------------------------------------------------------------------------------------------------------------------------------------------------------------------------------------------|--------------------------------------------------------|----------------------------------------------------------------------------------------------|-----------------------------------------------------------------------------------------------------------------------------------------------------------------------------------|------------|
| 23     | SMM                 | 2015         | Nanomaterials         | To develop an inclusion in the assessments, not only of human health and environmental risks, but also of aspects related to sustainable materials management.                                                                                                                         | set of aspects or indicators or criteria or parameters | regulators or national authorities or general decision-makers                                | Department of Technological Design and Development, Faculty of Production Engineering, University of Bremen, Badgasteiner and ARTEC – Research Center for Sustainability Studies. | (38)       |
| 24     | Societal Incubator  | 2015         | Nanomaterials         | To offer the opportunity to organise a collective action or learning process to accelerate responsible innovation and increase the chances of social success of nanotechnology.                                                                                                        | framework or guideline                                 | enterprises/industries of any dimensions/any kind of organization/or sustainability appliers | Rathenau Instituut                                                                                                                                                                | (39)       |
| 25     | Socio_economic_SSbD | 2022         | AdMa                  | To develop an innovative semi-quantitative methodology to socio-economic assessment of (advanced) engineered nanomaterials and nano-enabled products (NEPs) to support safe-and-sustainable-by-design (SSbD) decision making by industries in the early stages of product development. | set of aspects or indicators or criteria or parameters | enterprises/industries of any dimensions/any kind of organization/or sustainability appliers | see paper authors                                                                                                                                                                 | (40)       |

| Number | Tool name                             | Release year | Sector of application | Objective                                                                                                                                                                                                                 | Assessment structure                                   | Target user                                                                                  | Developers                        | References |
|--------|---------------------------------------|--------------|-----------------------|---------------------------------------------------------------------------------------------------------------------------------------------------------------------------------------------------------------------------|--------------------------------------------------------|----------------------------------------------------------------------------------------------|-----------------------------------|------------|
| 26     | SUNRISE_WP3<br>(SUNRISE project)      | 2025         | AdMa                  | To provide a refined set of questions indicators spanning environmental, social, and economic dimensions, and structured to reflect both product- and company-specific considerations across different life-cycle stages. | questionnaire                                          | enterprises/industries of any dimensions/any kind of organization/or sustainability appliers | Developed within SUNRISE project  | (41)       |
| 27     | SUNSHINE_TIER_1<br>(SUNSHINE project) | 2023         | Nanomaterials         | To evaluate the safety, functionality and sustainability in the early R&D stages of the lifecycle of chemicals and materials for a transition to a SSbD approach to chemicals                                             | questionnaire                                          | enterprises/industries of any dimensions/any kind of organization/or sustainability appliers | Developed within SUNSHINE project | (7)        |
| 28     | UNEP categories                       | 2020         | Sector-independent    | To help conducting S-LCA studies and to provide detailed information on each of the subcategories introduced in the Guidelines organized by stakeholder category.                                                         | set of aspects or indicators or criteria or parameters | enterprises/industries of any dimensions/any kind of organization/or sustainability appliers | UNEP                              | (42)       |

| Number | Tool name                  | Release year | Sector of application | Objective                                                                                                                                                                                                                           | Assessment structure | Target user | Developers                        | References |
|--------|----------------------------|--------------|-----------------------|-------------------------------------------------------------------------------------------------------------------------------------------------------------------------------------------------------------------------------------|----------------------|-------------|-----------------------------------|------------|
| 29     | WASP<br>(HARMLESS project) | 2025         | AdMa                  | To guide innovators in developing SSbD AdMa, by facilitating the assessment of most SSbD dimensions and visualizing the results in a comprehensive, yet detailed way, enabling their own balancing of SSbD benefits and trade-offs. | questionnaire        | innovators  | Developed within HARMLESS project | (43)       |

Table A 2: Dimensions assessed in each analysed tool. The analysis is qualitative and subjective. Yellow indicates that the dimension is partially addressed, meaning that more than one aspect of the dimension is considered, but not in a comprehensive or exhaustive manner. Light blue indicates that only a single, specific aspect of the dimension is (exhaustively or not exhaustively) addressed, without broader coverage. Purple means the dimension is the main focus/assessment purpose of the tool (probably related to a singular specific-dimension tool). Green means the dimension is well treated. Light green means the dimension is treated but less in comparison with the other dimension treated by the same tool (the difference is not quantified). Red means the dimension is not considered. The first column reports the number of the assessed tools as described in Table A 1.

| DIMENSION |        |                              |                         |                       |            |               |            |
|-----------|--------|------------------------------|-------------------------|-----------------------|------------|---------------|------------|
| Tool      | Safety | Environmental sustainability | Economic sustainability | Social sustainability | Regulation | Functionality | Governance |
| 1         |        |                              |                         |                       |            |               |            |
| 2         | Yellow | Purple                       |                         |                       |            |               |            |
| 3         |        |                              |                         |                       |            |               |            |
| 4         |        |                              |                         |                       |            |               |            |
| 5         |        |                              |                         |                       |            |               |            |
| 6         |        |                              |                         |                       |            |               |            |
| 7         |        |                              |                         |                       |            |               |            |
| 8         |        |                              |                         |                       |            |               |            |
| 9         |        |                              |                         |                       |            |               |            |
| 10        |        |                              |                         |                       |            |               |            |
| 11        |        |                              |                         |                       |            |               |            |
| 12        |        |                              |                         |                       |            |               |            |
| 13        |        |                              |                         |                       |            |               |            |
| 14        |        |                              |                         |                       |            |               |            |
| 15        |        |                              |                         |                       |            |               |            |
| 16        |        |                              |                         |                       |            |               |            |
| 17        |        |                              |                         |                       |            |               |            |
| 18        |        |                              |                         |                       |            |               |            |
| 19        |        |                              |                         |                       |            |               |            |
| 20        |        |                              |                         |                       |            |               |            |
| 21        |        |                              |                         |                       |            |               |            |
| 22        |        |                              |                         |                       |            |               |            |
| 23        |        |                              |                         |                       |            |               |            |
| 24        |        |                              |                         |                       |            |               |            |
| 25        |        |                              |                         |                       |            |               |            |
| 26        |        |                              |                         |                       |            |               |            |
| 27        |        |                              |                         |                       |            |               |            |
| 28        |        |                              |                         |                       |            |               |            |
| 29        |        |                              |                         |                       |            |               |            |

Table A 3: Examples of research team interventions to correct inappropriate AI categorisation. The modifications are grouped according to the type of intervention required.

| Inappropriate categorisation   | Indicator                                                                                                                             | AI indicators' category     | Final indicators' category      | Tool                    |
|--------------------------------|---------------------------------------------------------------------------------------------------------------------------------------|-----------------------------|---------------------------------|-------------------------|
| Example of wrong understanding | Wastewater                                                                                                                            | Water Pollution             | Waste production and management | Screening MCDA NANORIGO |
|                                | Does the manufacturing process lead to emissions of ozone depleting gases?                                                            | Emissions                   | Ozone depletion                 | AdMaCat                 |
|                                | ozone depletion potential (ODP)                                                                                                       | Climate Change              | Ozone depletion                 | ISA_chemicals           |
|                                | Direct costs of end-of-life                                                                                                           | Direct Costs                | Waste management costs          | TIER1B_SUNSHINE         |
|                                | Waste disposal                                                                                                                        | Direct Costs                | Waste production and management | SAFA_FAO                |
|                                | Critical materials                                                                                                                    | Resource Efficiency         | Critical materials              | TIER1B_SUNSHINE         |
|                                | Use of raw materials derived from renewable resources                                                                                 | Resource Efficiency         | Renewable resources             | TIER1B_SUNSHINE         |
|                                | Eutrophication potential (EP)                                                                                                         | Water Pollution             | Eutrophication                  | ISA_chemicals           |
|                                | Total turnover and employment for affected companies/industries                                                                       | Revenue and Profitability   | Employment                      | ECHA_SEA                |
|                                | Landscape/aesthetic quality of environment                                                                                            | Other Environmental Impacts | Land Consumption                | ECHA_SEA                |
|                                | Presence of a written contract which defines the relationship between the employers and workers (rights and responsibilities of each) | Labour Force                | Worker rights                   | UNEP_categories         |
|                                | Change in inspection and monitoring costs (e.g. of imports, of emissions, etc.)                                                       | Emissions                   | Other costs                     | ECHA_SEA                |
|                                | Cost difference in case of relocation of production (costs of establishing production facilities, cost of raw materials, transport    | Geographical Impact         | Capital costs                   | ECHA_SEA                |

| Inappropriate categorisation                                                                   | Indicator                                                                                                                   | AI indicators' category      | Final indicators' category   | Tool            |
|------------------------------------------------------------------------------------------------|-----------------------------------------------------------------------------------------------------------------------------|------------------------------|------------------------------|-----------------|
|                                                                                                | costs etc)                                                                                                                  |                              |                              |                 |
| Example of too specific indicators' categories grouped by the research team into a broader one | Organization efforts to strengthen community health (e.g. through shared community access to organization health resources) | Health and Safety            | Impacts on local communities | UNEP_categories |
|                                                                                                | Do policies related to intellectual property respect moral and economic rights of the community                             | Intellectual Property Rights | Impacts on local communities | UNEP_categories |
|                                                                                                | Days and months without sufficient food in past year                                                                        | Food Security                | Impacts on local communities | UNEP_categories |
| Example of a too generic indicators' category refined into more specific ones                  | Direct costs of end-of-life                                                                                                 | Direct Costs                 | Waste management costs       | TIER1B_SUNSHINE |
|                                                                                                | Direct costs of installation (heating, lighting) for manufacturing                                                          | Direct Costs                 | Manufacturing costs          | TIER1B_SUNSHINE |

Table A 4: List of 92 indicators' categories, showing the total number of occurrences and the number of distinct tools in which each indicators' category is mentioned, ordered by decreasing tools per indicators' category. The eleven functionality indicators' categories, derived from the initial "Functionality" one, were excluded, as reported in Table A 5.

| Indicators' category                                         | Total Occurrences | Number of tools per indicators' category |
|--------------------------------------------------------------|-------------------|------------------------------------------|
| Waste production and management                              | 37                | 12                                       |
| Employment                                                   | 34                | 12                                       |
| Innovation and R&D                                           | 22                | 12                                       |
| Emissions                                                    | 42                | 11                                       |
| Market dimension and Application Potential                   | 27                | 11                                       |
| Resource Efficiency                                          | 15                | 11                                       |
| Energy Consumption                                           | 20                | 10                                       |
| Supply chain traceability                                    | 27                | 9                                        |
| Impacts on local communities                                 | 25                | 9                                        |
| Circular Economy                                             | 33                | 8                                        |
| Work Fairness                                                | 28                | 8                                        |
| Workplace Conditions                                         | 21                | 8                                        |
| Water Consumption                                            | 19                | 8                                        |
| Consumer Benefits                                            | 15                | 8                                        |
| Climate Change                                               | 13                | 8                                        |
| Critical materials                                           | 8                 | 8                                        |
| Data management and Transparency                             | 15                | 7                                        |
| Social improvement                                           | 14                | 7                                        |
| Wages and Salaries                                           | 10                | 7                                        |
| Corporate Social Responsibility                              | 57                | 6                                        |
| Other costs                                                  | 30                | 6                                        |
| Manufacturing costs                                          | 19                | 6                                        |
| Animal Welfare                                               | 13                | 6                                        |
| Indigenous Rights                                            | 9                 | 6                                        |
| Chemical/material within the scope of available legislations | 25                | 5                                        |
| Worker Rights                                                | 22                | 5                                        |
| Occupational safety                                          | 19                | 5                                        |
| Use costs                                                    | 18                | 5                                        |
| Eco-Toxicity                                                 | 13                | 5                                        |
| Consumer Health and Safety                                   | 8                 | 5                                        |
| Child Labour                                                 | 8                 | 5                                        |
| Soil Quality                                                 | 8                 | 5                                        |
| Healthcare Access                                            | 6                 | 5                                        |
| Ozone depletion                                              | 6                 | 5                                        |
| Conflicts Management                                         | 5                 | 5                                        |
| Process Optimization                                         | 5                 | 5                                        |
| Forced Labour                                                | 5                 | 5                                        |
| Child Welfare                                                | 12                | 4                                        |
| Revenues                                                     | 11                | 4                                        |
| Environmental exposure, fate, stability and transformation   | 11                | 4                                        |

| Indicators' category                                               | Total Occurrences | Number of tools per indicators' category |
|--------------------------------------------------------------------|-------------------|------------------------------------------|
| Capacity building                                                  | 9                 | 4                                        |
| Economic Benefits                                                  | 8                 | 4                                        |
| Hazardous substances or materials                                  | 8                 | 4                                        |
| Land Consumption                                                   | 6                 | 4                                        |
| Poverty Alleviation                                                | 6                 | 4                                        |
| Air Quality                                                        | 5                 | 4                                        |
| Conflict-Free Sourcing                                             | 5                 | 4                                        |
| Environment resilience and vulnerability                           | 4                 | 4                                        |
| Stakeholders Engagement                                            | 20                | 3                                        |
| Persistent, bioaccumulative and toxic                              | 7                 | 3                                        |
| Biodiversity                                                       | 7                 | 3                                        |
| Waste management costs                                             | 6                 | 3                                        |
| Education Access                                                   | 6                 | 3                                        |
| Eutrophication                                                     | 5                 | 3                                        |
| Materials costs                                                    | 3                 | 3                                        |
| Labour Impact                                                      | 7                 | 2                                        |
| Maintenance costs                                                  | 6                 | 2                                        |
| Human Toxicity                                                     | 5                 | 2                                        |
| Criminality                                                        | 5                 | 2                                        |
| Contribution to SDGs                                               | 4                 | 2                                        |
| Capital costs                                                      | 4                 | 2                                        |
| Personnel costs                                                    | 4                 | 2                                        |
| Packaging optimization                                             | 4                 | 2                                        |
| Cultural Heritage Protection                                       | 4                 | 2                                        |
| Sexual harassment                                                  | 4                 | 2                                        |
| Support to vulnerable people                                       | 3                 | 2                                        |
| Transportation costs                                               | 2                 | 2                                        |
| Water Pollution                                                    | 2                 | 2                                        |
| Renewable resources                                                | 2                 | 2                                        |
| Housing Quality                                                    | 2                 | 2                                        |
| Violation of regulations                                           | 2                 | 2                                        |
| End-of-life information                                            | 2                 | 2                                        |
| Recognised techniques for characterisation and exposure estimation | 3                 | 1                                        |
| Resource Independence                                              | 3                 | 1                                        |
| Renewable Energy                                                   | 2                 | 1                                        |
| Food quality and safety                                            | 2                 | 1                                        |
| Agricultural Productivity                                          | 2                 | 1                                        |
| Remediation of contamination activities/sites                      | 1                 | 1                                        |
| Asset integrity and critical incident management                   | 1                 | 1                                        |
| Cost-effectiveness                                                 | 1                 | 1                                        |
| Geographical Accessibility of the Product                          | 1                 | 1                                        |
| Manufacturing Comparison                                           | 1                 | 1                                        |

| Indicators' category               | Total Occurrences | Number of tools per indicators' category |
|------------------------------------|-------------------|------------------------------------------|
| Diversity of technological options | 1                 | 1                                        |
| Community Resilience               | 1                 | 1                                        |
| Habitat diversity and connectivity | 1                 | 1                                        |
| Migrant Labour                     | 1                 | 1                                        |
| Process scalability                | 1                 | 1                                        |
| Use of bio-based materials         | 1                 | 1                                        |
| Company governance                 | 1                 | 1                                        |
| Infrastructure Management          | 1                 | 1                                        |
| Migrant Integration                | 1                 | 1                                        |
| Water acidification                | 1                 | 1                                        |

Table A 5: Indicators' category and their relative occurrences per dimension. The number of dimensions in which each indicator is included is reported in the last column. Cells in grey are those with 0 occurrence for the indicators' category within a specific dimension.

| Indicators' category                       | Environmental sustainability dimension | Social sustainability dimension | Economic sustainability dimension | Functionality dimension | Regulation dimension | Governance dimension | Total Occurrences | Number of dimensions per indicators' category |
|--------------------------------------------|----------------------------------------|---------------------------------|-----------------------------------|-------------------------|----------------------|----------------------|-------------------|-----------------------------------------------|
| Contribution to SDGs                       | 1                                      | 2                               | 1                                 | 0                       | 0                    | 0                    | 4                 | 3                                             |
| Energy Consumption                         | 20                                     | 0                               | 0                                 | 0                       | 0                    | 0                    | 20                | 1                                             |
| Resource Efficiency                        | 15                                     | 0                               | 0                                 | 0                       | 0                    | 0                    | 15                | 1                                             |
| Climate Change                             | 13                                     | 0                               | 0                                 | 0                       | 0                    | 0                    | 13                | 1                                             |
| Emissions                                  | 42                                     | 0                               | 0                                 | 0                       | 0                    | 0                    | 42                | 1                                             |
| Functionality                              | 9                                      | 25                              | 7                                 | 16                      | 0                    | 0                    | 57                | 4                                             |
| Environment resilience and vulnerability   | 4                                      | 0                               | 0                                 | 0                       | 0                    | 0                    | 4                 | 1                                             |
| Innovation and R&D                         | 1                                      | 11                              | 10                                | 0                       | 0                    | 0                    | 22                | 3                                             |
| Market dimension and Application Potential | 1                                      | 4                               | 22                                | 0                       | 0                    | 0                    | 27                | 3                                             |
| Revenues                                   | 0                                      | 0                               | 11                                | 0                       | 0                    | 0                    | 11                | 1                                             |
| Economic Benefits                          | 0                                      | 0                               | 8                                 | 0                       | 0                    | 0                    | 8                 | 1                                             |
| Social improvement                         | 1                                      | 13                              | 0                                 | 0                       | 0                    | 0                    | 14                | 2                                             |
| Occupational safety                        | 0                                      | 19                              | 0                                 | 0                       | 0                    | 0                    | 19                | 1                                             |
| Consumer Health and Safety                 | 0                                      | 8                               | 0                                 | 0                       | 0                    | 0                    | 8                 | 1                                             |
| Healthcare Access                          | 0                                      | 6                               | 0                                 | 0                       | 0                    | 0                    | 6                 | 1                                             |
| Employment                                 | 0                                      | 31                              | 3                                 | 0                       | 0                    | 0                    | 34                | 2                                             |
| Persistent, bioaccumulative and toxic      | 7                                      | 0                               | 0                                 | 0                       | 0                    | 0                    | 7                 | 1                                             |

| Indicators' category                                               | Environmental sustainability dimension | Social sustainability dimension | Economic sustainability dimension | Functionality dimension | Regulation dimension | Governance dimension | Total Occurrences | Number of dimensions per indicators' category |
|--------------------------------------------------------------------|----------------------------------------|---------------------------------|-----------------------------------|-------------------------|----------------------|----------------------|-------------------|-----------------------------------------------|
| Circular Economy                                                   | 31                                     | 0                               | 2                                 | 0                       | 0                    | 0                    | 33                | 2                                             |
| Critical materials                                                 | 8                                      | 0                               | 0                                 | 0                       | 0                    | 0                    | 8                 | 1                                             |
| Eco-Toxicity                                                       | 13                                     | 0                               | 0                                 | 0                       | 0                    | 0                    | 13                | 1                                             |
| Hazardous substances or materials                                  | 7                                      | 1                               | 0                                 | 0                       | 0                    | 0                    | 8                 | 2                                             |
| Data management and Transparency                                   | 0                                      | 13                              | 1                                 | 0                       | 1                    | 0                    | 15                | 3                                             |
| Environmental exposure, fate, stability and transformation         | 11                                     | 0                               | 0                                 | 0                       | 0                    | 0                    | 11                | 1                                             |
| Chemical/material within the scope of available legislations       | 1                                      | 6                               | 0                                 | 0                       | 18                   | 0                    | 25                | 3                                             |
| Recognised techniques for characterisation and exposure estimation | 0                                      | 0                               | 0                                 | 0                       | 3                    | 0                    | 3                 | 1                                             |
| Waste production and management                                    | 36                                     | 1                               | 0                                 | 0                       | 0                    | 0                    | 37                | 2                                             |
| Land Consumption                                                   | 6                                      | 0                               | 0                                 | 0                       | 0                    | 0                    | 6                 | 1                                             |
| Ozone depletion                                                    | 6                                      | 0                               | 0                                 | 0                       | 0                    | 0                    | 6                 | 1                                             |
| Water Consumption                                                  | 18                                     | 1                               | 0                                 | 0                       | 0                    | 0                    | 19                | 2                                             |
| Conflicts Management                                               | 0                                      | 4                               | 0                                 | 0                       | 0                    | 1                    | 5                 | 2                                             |
| Consumer Benefits                                                  | 0                                      | 13                              | 2                                 | 0                       | 0                    | 0                    | 15                | 2                                             |
| Process Optimization                                               | 3                                      | 0                               | 2                                 | 0                       | 0                    | 0                    | 5                 | 2                                             |
| Use costs                                                          | 0                                      | 2                               | 16                                | 0                       | 0                    | 0                    | 18                | 2                                             |

| Indicators' category                          | Environmental sustainability dimension | Social sustainability dimension | Economic sustainability dimension | Functionality dimension | Regulation dimension | Governance dimension | Total Occurrences | Number of dimensions per indicators' category |
|-----------------------------------------------|----------------------------------------|---------------------------------|-----------------------------------|-------------------------|----------------------|----------------------|-------------------|-----------------------------------------------|
| Manufacturing costs                           | 0                                      | 0                               | 19                                | 0                       | 0                    | 0                    | 19                | 1                                             |
| Air Quality                                   | 5                                      | 0                               | 0                                 | 0                       | 0                    | 0                    | 5                 | 1                                             |
| Biodiversity                                  | 7                                      | 0                               | 0                                 | 0                       | 0                    | 0                    | 7                 | 1                                             |
| Labour Impact                                 | 0                                      | 7                               | 0                                 | 0                       | 0                    | 0                    | 7                 | 1                                             |
| Workplace Conditions                          | 0                                      | 21                              | 0                                 | 0                       | 0                    | 0                    | 21                | 1                                             |
| Child Labour                                  | 0                                      | 8                               | 0                                 | 0                       | 0                    | 0                    | 8                 | 1                                             |
| Capital costs                                 | 0                                      | 0                               | 4                                 | 0                       | 0                    | 0                    | 4                 | 1                                             |
| Other costs                                   | 0                                      | 0                               | 29                                | 0                       | 0                    | 1                    | 30                | 2                                             |
| Materials costs                               | 0                                      | 0                               | 3                                 | 0                       | 0                    | 0                    | 3                 | 1                                             |
| Transportation costs                          | 0                                      | 0                               | 2                                 | 0                       | 0                    | 0                    | 2                 | 1                                             |
| Maintenance costs                             | 0                                      | 0                               | 6                                 | 0                       | 0                    | 0                    | 6                 | 1                                             |
| Waste management costs                        | 0                                      | 0                               | 6                                 | 0                       | 0                    | 0                    | 6                 | 1                                             |
| Personell costs                               | 0                                      | 0                               | 4                                 | 0                       | 0                    | 0                    | 4                 | 1                                             |
| Forced Labour                                 | 0                                      | 5                               | 0                                 | 0                       | 0                    | 0                    | 5                 | 1                                             |
| Soil Quality                                  | 8                                      | 0                               | 0                                 | 0                       | 0                    | 0                    | 8                 | 1                                             |
| Supply chain traceability                     | 0                                      | 15                              | 12                                | 0                       | 0                    | 0                    | 27                | 2                                             |
| Wages and Salaries                            | 0                                      | 10                              | 0                                 | 0                       | 0                    | 0                    | 10                | 1                                             |
| Water Pollution                               | 2                                      | 0                               | 0                                 | 0                       | 0                    | 0                    | 2                 | 1                                             |
| Work Fairness                                 | 0                                      | 28                              | 0                                 | 0                       | 0                    | 0                    | 28                | 1                                             |
| Worker Rights                                 | 0                                      | 22                              | 0                                 | 0                       | 0                    | 0                    | 22                | 1                                             |
| Remediation of contamination activities/sites | 1                                      | 0                               | 0                                 | 0                       | 0                    | 0                    | 1                 | 1                                             |

| Indicators' category                             | Environmental sustainability dimension | Social sustainability dimension | Economic sustainability dimension | Functionality dimension | Regulation dimension | Governance dimension | Total Occurrences | Number of dimensions per indicators' category |
|--------------------------------------------------|----------------------------------------|---------------------------------|-----------------------------------|-------------------------|----------------------|----------------------|-------------------|-----------------------------------------------|
| Asset integrity and critical incident management | 1                                      | 0                               | 0                                 | 0                       | 0                    | 0                    | 1                 | 1                                             |
| Corporate Social Responsibility                  | 3                                      | 40                              | 2                                 | 0                       | 0                    | 12                   | 57                | 4                                             |
| Indigenous Rights                                | 0                                      | 9                               | 0                                 | 0                       | 0                    | 0                    | 9                 | 1                                             |
| Impacts on local communities                     | 0                                      | 25                              | 0                                 | 0                       | 0                    | 0                    | 25                | 1                                             |
| Eutrophication                                   | 5                                      | 0                               | 0                                 | 0                       | 0                    | 0                    | 5                 | 1                                             |
| Human Toxicity                                   | 5                                      | 0                               | 0                                 | 0                       | 0                    | 0                    | 5                 | 1                                             |
| Child Welfare                                    | 0                                      | 12                              | 0                                 | 0                       | 0                    | 0                    | 12                | 1                                             |
| Animal Welfare                                   | 4                                      | 9                               | 0                                 | 0                       | 0                    | 0                    | 13                | 2                                             |
| Cost-effectiveness                               | 0                                      | 1                               | 0                                 | 0                       | 0                    | 0                    | 1                 | 1                                             |
| Geographical Accessibility of the Product        | 0                                      | 0                               | 1                                 | 0                       | 0                    | 0                    | 1                 | 1                                             |
| Renewable Energy                                 | 2                                      | 0                               | 0                                 | 0                       | 0                    | 0                    | 2                 | 1                                             |
| Packaging optimization                           | 4                                      | 0                               | 0                                 | 0                       | 0                    | 0                    | 4                 | 1                                             |
| Manufacturing Comparison                         | 1                                      | 0                               | 0                                 | 0                       | 0                    | 0                    | 1                 | 1                                             |
| Diversity of technological options               | 0                                      | 1                               | 0                                 | 0                       | 0                    | 0                    | 1                 | 1                                             |
| Resource Independence                            | 0                                      | 3                               | 0                                 | 0                       | 0                    | 0                    | 3                 | 1                                             |
| Community Resilience                             | 0                                      | 1                               | 0                                 | 0                       | 0                    | 0                    | 1                 | 1                                             |
| Capacity building                                | 0                                      | 9                               | 0                                 | 0                       | 0                    | 0                    | 9                 | 1                                             |

| <b>Indicators' category</b>        | <b>Environmental sustainability dimension</b> | <b>Social sustainability dimension</b> | <b>Economic sustainability dimension</b> | <b>Functionality dimension</b> | <b>Regulation dimension</b> | <b>Governance dimension</b> | <b>Total Occurrences</b> | <b>Number of dimensions per indicators' category</b> |
|------------------------------------|-----------------------------------------------|----------------------------------------|------------------------------------------|--------------------------------|-----------------------------|-----------------------------|--------------------------|------------------------------------------------------|
| Habitat diversity and connectivity | 1                                             | 0                                      | 0                                        | 0                              | 0                           | 0                           | 1                        | 1                                                    |
| Renewable resources                | 2                                             | 0                                      | 0                                        | 0                              | 0                           | 0                           | 2                        | 1                                                    |
| Stakeholders Engagement            | 0                                             | 19                                     | 0                                        | 0                              | 0                           | 1                           | 20                       | 2                                                    |
| Support to vulnerable people       | 0                                             | 3                                      | 0                                        | 0                              | 0                           | 0                           | 3                        | 1                                                    |
| Food quality and safety            | 0                                             | 0                                      | 2                                        | 0                              | 0                           | 0                           | 2                        | 1                                                    |
| Criminality                        | 0                                             | 5                                      | 0                                        | 0                              | 0                           | 0                           | 5                        | 1                                                    |
| Education Access                   | 0                                             | 6                                      | 0                                        | 0                              | 0                           | 0                           | 6                        | 1                                                    |
| Housing Quality                    | 0                                             | 2                                      | 0                                        | 0                              | 0                           | 0                           | 2                        | 1                                                    |
| Poverty Alleviation                | 0                                             | 6                                      | 0                                        | 0                              | 0                           | 0                           | 6                        | 1                                                    |
| Conflict-Free Sourcing             | 0                                             | 5                                      | 0                                        | 0                              | 0                           | 0                           | 5                        | 1                                                    |
| Migrant Labour                     | 0                                             | 1                                      | 0                                        | 0                              | 0                           | 0                           | 1                        | 1                                                    |
| Violation of regulations           | 0                                             | 2                                      | 0                                        | 0                              | 0                           | 0                           | 2                        | 1                                                    |
| Process scalability                | 0                                             | 0                                      | 0                                        | 1                              | 0                           | 0                           | 1                        | 1                                                    |
| Use of bio-based materials         | 1                                             | 0                                      | 0                                        | 0                              | 0                           | 0                           | 1                        | 1                                                    |
| Company governance                 | 0                                             | 1                                      | 0                                        | 0                              | 0                           | 0                           | 1                        | 1                                                    |
| Infrastructure Management          | 0                                             | 1                                      | 0                                        | 0                              | 0                           | 0                           | 1                        | 1                                                    |
| Agricultural Productivity          | 0                                             | 2                                      | 0                                        | 0                              | 0                           | 0                           | 2                        | 1                                                    |
| Cultural Heritage Protection       | 0                                             | 4                                      | 0                                        | 0                              | 0                           | 0                           | 4                        | 1                                                    |

| <b>Indicators' category</b> | <b>Environmental sustainability dimension</b> | <b>Social sustainability dimension</b> | <b>Economic sustainability dimension</b> | <b>Functionality dimension</b> | <b>Regulation dimension</b> | <b>Governance dimension</b> | <b>Total Occurrences</b> | <b>Number of dimensions per indicators' category</b> |
|-----------------------------|-----------------------------------------------|----------------------------------------|------------------------------------------|--------------------------------|-----------------------------|-----------------------------|--------------------------|------------------------------------------------------|
| End-of-life information     | 0                                             | 2                                      | 0                                        | 0                              | 0                           | 0                           | 2                        | 1                                                    |
| Migrant Integration         | 0                                             | 1                                      | 0                                        | 0                              | 0                           | 0                           | 1                        | 1                                                    |
| Sexual harassment           | 0                                             | 4                                      | 0                                        | 0                              | 0                           | 0                           | 4                        | 1                                                    |
| Water acidification         | 1                                             | 0                                      | 0                                        | 0                              | 0                           | 0                           | 1                        | 1                                                    |

*Table A 6: The eleven “Functionality” indicators’ categories ordered by decreasing number of tools per indicators’ category. The corresponding total occurrences for each indicator within the emerging functionality dimension are also reported.*

| <b>Functionality indicators’ category</b> | <b>Total occurrences</b> | <b>Number of tools per “Functionality” indicators’ category</b> |
|-------------------------------------------|--------------------------|-----------------------------------------------------------------|
| Durability                                | 9                        | 8                                                               |
| Consumer needs                            | 8                        | 4                                                               |
| Social benefits                           | 10                       | 3                                                               |
| Additional functions                      | 5                        | 3                                                               |
| Reliability                               | 4                        | 2                                                               |
| Efficiency                                | 2                        | 2                                                               |
| End-of-life                               | 2                        | 2                                                               |
| Useability                                | 2                        | 2                                                               |
| Utility                                   | 3                        | 1                                                               |
| Maintenance                               | 1                        | 1                                                               |
| Versatility                               | 1                        | 1                                                               |
